# Supplementary material for: Comparison of immune checkpoint inhibitors related to pulmonary adverse events: a retrospective analysis of clinical studies and network meta-analysis
Source: Springer Nature journal article supplement (doi:10.1186/s12916-024-03285-3), 2024-02-19
Supplement: MOESM1 [file 26749538]

## Supplemental materials

**Supplementary Methods.** Search Terms

**Table S1.** PRISMA NMA Checklist

**Table S2.** Study and Patient Characteristics

**Table S3.** Results of individual studies

**Table S4.** Fatal Pulmonary Adverse Events Outcome: League Table

**Table S5.** All-grade Treatment-related Pulmonary Adverse Events in Tumors of Different Systems  
Outcome: League Table

**Table S6.** Grade 3-4 Treatment-related Pulmonary Adverse Events in Tumors of Different Systems  
Outcome: League Table

**Table S7.** Model selection of All Outcomes

**Table S8.** Inconsistency Test

**Figure S1.** Flowchart of Study Selection

**Figure S2.** Risk of Bias Assessment for Studies

**Figure S3.** Comparison-adjusted funnel plots

**Figure S4.** Network plots

**Figure S5.** The distribution of SUCRA values stratified by cancer types

**Figure S6.** Subgroup analysis by dose of drug

This supplementary material has been provided by the authors to give readers additional information about their work.

## Supplementary Methods. Search Terms

#1

“Neoplasms”[mh] OR Neoplasms[tiab] OR Neoplasm[tiab] OR Cancer[tiab] OR  
Cancers[tiab] OR Tumors [tiab] OR Tumor[tiab] OR  
Malignancy[tiab] OR Malignancies[tiab]

#2

Programmed death ligand 1[tiab] OR PD-L1[tiab] OR Programmed death 1[tiab] OR  
PD-1[tiab] OR Cytotoxic T-lymphocyte antigen 4[tiab] OR CTLA-4[tiab] OR Immune  
Checkpoint Inhibitor[tiab] OR immune therapy[tiab] OR immunotherapy[tiab]  
OR  
Nivolumab[tiab] OR MDX-1106[tiab] OR ONO-4538[tiab] OR BMS-936558[tiab] OR  
Opdivo [tiab] OR  
Pembrolizumab[tiab] OR lambrolizumab[tiab] OR Keytruda[tiab] OR MK-3475[tiab]  
OR  
Cemiplimab[tiab] OR Toripalimab[tiab] OR JS001[tiab]OR Sintilimab[tiab]  
OR  
Durvalumab [tiab]  
OR  
Atezolizumab[tiab] OR MPDL3280A[tiab] OR tecentriq[tiab] OR RG7446[tiab] OR  
RG-7446[tiab] OR  
Avelumab[tiab] OR MSB0010718C[tiab]  
OR  
Ipilimumab[tiab] OR Anti CTLA 4 MAb Ipilimumab[tiab] OR Anti-CTLA-4 MAb  
Ipilimumab[tiab] OR Ipilimumab, Anti-CTLA-4 MAb[tiab] OR Yervoy[tiab] OR  
MDX010[tiab] OR MDX 010[tiab] OR MDX-010 M[tiab] OR MDX CTLA 4[tiab]  
OR  
Tremelimumab[tiab] OR ticilimumab[tiab] OR CP 675[Title/Abstract] OR CP675 cpd[tiab]  
OR CP-675[tiab] OR CP-675,206[tiab] OR CP-675206[tiab] OR CP675206[tiab] OR CP  
675206[tiab]  
OR  
Camrelizumab[tiab]OR SHR-1210[tiab]OR SHR 1210[tiab]

#3

(randomized controlled trial[pt] OR controlled clinical trial[pt] OR randomized[tiab] OR  
placebo[tiab] OR clinical trials as topic[mesh:noexp] OR randomly[tiab] OR trial[ti]) NOT  
(animals[mh] NOT (humans[mh] AND animals[mh]))

#4

"2011/01/01"[Date - Publication] : "2023/04/30"[Date - Publication]

#5

#1AND#2AND#3AND#4

**Table S1 PRISMA NMA Checklist**

| Section/Topic             | Item | Checklist Item                                                                                                                                                                                                                                                                                                                                                                                                                                                                                                                                                                                                                                                                                                                                                                          | Reported on Page |
|---------------------------|------|-----------------------------------------------------------------------------------------------------------------------------------------------------------------------------------------------------------------------------------------------------------------------------------------------------------------------------------------------------------------------------------------------------------------------------------------------------------------------------------------------------------------------------------------------------------------------------------------------------------------------------------------------------------------------------------------------------------------------------------------------------------------------------------------|------------------|
| <b>TITLE</b>              |      |                                                                                                                                                                                                                                                                                                                                                                                                                                                                                                                                                                                                                                                                                                                                                                                         |                  |
| Title                     | 1    | Identify the report as a systematic review <i>incorporating a network meta-analysis (or related form of meta-analysis)</i> .                                                                                                                                                                                                                                                                                                                                                                                                                                                                                                                                                                                                                                                            | 1                |
| <b>ABSTRACT</b>           |      |                                                                                                                                                                                                                                                                                                                                                                                                                                                                                                                                                                                                                                                                                                                                                                                         |                  |
| Structured summary        | 2    | Provide a structured summary including, as applicable:<br><b>Background:</b> main objectives<br><b>Methods:</b> data sources; study eligibility criteria, participants, and interventions; study appraisal; and <i>synthesis methods, such as network meta-analysis</i> .<br><b>Results:</b> number of studies and participants identified; summary estimates with corresponding confidence/credible intervals; <i>treatment rankings may also be discussed. Authors may choose to summarize pairwise comparisons against a chosen treatment included in their analyses for brevity.</i><br><b>Discussion/Conclusions:</b> limitations; conclusions and implications of findings.<br><b>Other:</b> primary source of funding; systematic review registration number with registry name. | 2-3              |
| <b>INTRODUCTION</b>       |      |                                                                                                                                                                                                                                                                                                                                                                                                                                                                                                                                                                                                                                                                                                                                                                                         |                  |
| Rationale                 | 3    | Describe the rationale for the review in the context of what is already known, <i>including mention of why a network meta-analysis has been conducted.</i> _                                                                                                                                                                                                                                                                                                                                                                                                                                                                                                                                                                                                                            | 3                |
| Objectives                | 4    | Provide an explicit statement of questions being addressed, with reference to participants, interventions, comparisons, outcomes, and study design (PICOS).                                                                                                                                                                                                                                                                                                                                                                                                                                                                                                                                                                                                                             | 3                |
| <b>METHODS</b>            |      |                                                                                                                                                                                                                                                                                                                                                                                                                                                                                                                                                                                                                                                                                                                                                                                         |                  |
| Protocol and registration | 5    | Indicate whether a review protocol exists and if and where it can be accessed (e.g., Web address); and, if available, provide registration information, including registration number.                                                                                                                                                                                                                                                                                                                                                                                                                                                                                                                                                                                                  | 4                |
| Eligibility criteria      | 6    | Specify study characteristics (e.g., PICOS, length of follow-up) and report characteristics (e.g., years considered, language, publication status) used as criteria for eligibility, giving rationale. <i>Clearly describe eligible treatments included in the treatment network, and note whether any have been clustered or merged into the same node (with justification).</i> _                                                                                                                                                                                                                                                                                                                                                                                                     | 4-5              |
| Information sources       | 7    | Describe all information sources (e.g., databases with dates of coverage, contact with study authors to identify additional studies) in the search and date last searched.                                                                                                                                                                                                                                                                                                                                                                                                                                                                                                                                                                                                              | 5                |
| Search                    | 8    | Present full electronic search strategy for at least one                                                                                                                                                                                                                                                                                                                                                                                                                                                                                                                                                                                                                                                                                                                                | Supplemnt        |

| Section/Topic                          | Item      | Checklist Item                                                                                                                                                                                                                                                                                                                                                                                                         | Reported on Page |
|----------------------------------------|-----------|------------------------------------------------------------------------------------------------------------------------------------------------------------------------------------------------------------------------------------------------------------------------------------------------------------------------------------------------------------------------------------------------------------------------|------------------|
|                                        |           | database, including any limits used, such that it could be repeated.                                                                                                                                                                                                                                                                                                                                                   | eMethods         |
| Study selection                        | 9         | State the process for selecting studies (i.e., screening, eligibility, included in systematic review, and, if applicable, included in the meta-analysis).                                                                                                                                                                                                                                                              | Figure S1        |
| Data collection process                | 10        | Describe method of data extraction from reports (e.g., piloted forms, independently, in duplicate) and any processes for obtaining and confirming data from investigators.                                                                                                                                                                                                                                             | 5                |
| Data items                             | 11        | List and define all variables for which data were sought (e.g., PICOS, funding sources) and any assumptions and simplifications made.                                                                                                                                                                                                                                                                                  | 5                |
| <b>Geometry of the network</b>         | <b>S1</b> | Describe methods used to explore the geometry of the treatment network under study and potential biases related to it. This should include how the evidence base has been graphically summarized for presentation, and what characteristics were compiled and used to describe the evidence base to readers.                                                                                                           | 6                |
| Risk of bias within individual studies | 12        | Describe methods used for assessing risk of bias of individual studies (including specification of whether this was done at the study or outcome level), and how this information is to be used in any data synthesis.                                                                                                                                                                                                 | 6                |
| Summary measures                       | 13        | State the principal summary measures (e.g., risk ratio, difference in means). <i>Also describe the use of additional summary measures assessed, such as treatment rankings and surface under the cumulative ranking curve (SUCRA) values, as well as modified approaches used to present summary findings from meta-analyses.</i>                                                                                      | 6                |
| Planned methods of analysis            | 14        | Describe the methods of handling data and combining results of studies for each network meta-analysis. This should include, but not be limited to: <ul style="list-style-type: none"> <li>• <i>Handling of multi-arm trials;</i></li> <li>• <i>Selection of variance structure;</i></li> <li>• <i>Selection of prior distributions in Bayesian analyses; and</i></li> <li>• <i>Assessment of model fit.</i></li> </ul> | 6                |
| <b>Assessment of Inconsistency</b>     | <b>S2</b> | Describe the statistical methods used to evaluate the agreement of direct and indirect evidence in the treatment network(s) studied. Describe efforts taken to address its presence when found.                                                                                                                                                                                                                        | 6                |
| Risk of bias across studies            | 15        | Specify any assessment of risk of bias that may affect the cumulative evidence (e.g., publication bias, selective reporting within studies).                                                                                                                                                                                                                                                                           | 6                |
| Additional                             | 16        | Describe methods of additional analyses if done, indicating                                                                                                                                                                                                                                                                                                                                                            | 6                |



| Section/Topic                            | Item      | Checklist Item                                                                                                                                                                                                                                                                                                                                                                                                                                               | Reported on Page                                                    |
|------------------------------------------|-----------|--------------------------------------------------------------------------------------------------------------------------------------------------------------------------------------------------------------------------------------------------------------------------------------------------------------------------------------------------------------------------------------------------------------------------------------------------------------|---------------------------------------------------------------------|
| analyses                                 |           | <p>which were pre-specified. This may include, but not be limited to, the following:</p> <ul style="list-style-type: none"> <li>• Sensitivity or subgroup analyses;</li> <li>• Meta-regression analyses;</li> <li>• <i>Alternative formulations of the treatment network; and</i></li> <li>• <i>Use of alternative prior distributions for Bayesian analyses (if applicable).</i></li> </ul>                                                                 |                                                                     |
| <b>RESULTS</b>                           |           |                                                                                                                                                                                                                                                                                                                                                                                                                                                              |                                                                     |
| Study selection                          | 17        | Give numbers of studies screened, assessed for eligibility, and included in the review, with reasons for exclusions at each stage, ideally with a flow diagram.                                                                                                                                                                                                                                                                                              | 7, Figure S1                                                        |
| <b>Presentation of network structure</b> | <b>S3</b> | Provide a network graph of the included studies to enable visualization of the geometry of the treatment network.                                                                                                                                                                                                                                                                                                                                            | Figure 2, Figure S4                                                 |
| <b>Summary of network geometry</b>       | <b>S4</b> | Provide a brief overview of characteristics of the treatment network. This may include commentary on the abundance of trials and randomized patients for the different interventions and pairwise comparisons in the network, gaps of evidence in the treatment network, and potential biases reflected by the network structure.                                                                                                                            | 8-10                                                                |
| Study characteristics                    | 18        | For each study, present characteristics for which data were extracted (e.g., study size, PICOS, follow-up period) and provide the citations.                                                                                                                                                                                                                                                                                                                 | 7, Table S2                                                         |
| Risk of bias within studies              | 19        | Present data on risk of bias of each study and, if available, any outcome level assessment.                                                                                                                                                                                                                                                                                                                                                                  | 7, Figure S2                                                        |
| Results of individual studies            | 20        | For all outcomes considered (benefits or harms), present, for each study: 1) simple summary data for each intervention group, and 2) effect estimates and confidence intervals. <i>Modified approaches may be needed to deal with information from larger networks.</i>                                                                                                                                                                                      | Table S3                                                            |
| Synthesis of results                     | 21        | Present results of each meta-analysis done, including confidence/credible intervals. <i>In larger networks, authors may focus on comparisons versus a particular comparator (e.g. placebo or standard care), with full findings presented in an appendix. League tables and forest plots may be considered to summarize pairwise comparisons.</i> If additional summary measures were explored (such as treatment rankings), these should also be presented. | 8-11<br>Table 1,<br>Table S4,<br>Table S5,<br>Table S6<br>Figure S5 |
| <b>Exploration for inconsistency</b>     | <b>S5</b> | Describe results from investigations of inconsistency. This may include such information as measures of model fit to compare consistency and inconsistency models, <i>P</i> values from statistical tests, or summary of inconsistency estimates                                                                                                                                                                                                             | 12, Table S8                                                        |

| Section/Topic                  | Item | Checklist Item                                                                                                                                                                                                                                                                                                                                                                                                                 | Reported on Page                                            |
|--------------------------------|------|--------------------------------------------------------------------------------------------------------------------------------------------------------------------------------------------------------------------------------------------------------------------------------------------------------------------------------------------------------------------------------------------------------------------------------|-------------------------------------------------------------|
|                                |      | from different parts of the treatment network.                                                                                                                                                                                                                                                                                                                                                                                 |                                                             |
| Risk of bias across studies    | 22   | Present results of any assessment of risk of bias across studies for the evidence base being studied.                                                                                                                                                                                                                                                                                                                          | 12,<br>Figure S2<br>Figure S3                               |
| Results of additional analyses | 23   | Give results of additional analyses, if done (e.g., sensitivity or subgroup analyses, meta-regression analyses, <i>alternative network geometries studied, alternative choice of prior distributions for Bayesian analyses</i> , and so forth).                                                                                                                                                                                | 10-11,<br>Table S5<br>Table S6,<br>Figure S5,<br>Figure S6, |
| <b>DISCUSSION</b>              |      |                                                                                                                                                                                                                                                                                                                                                                                                                                |                                                             |
| Summary of evidence            | 24   | Summarize the main findings, including the strength of evidence for each main outcome; consider their relevance to key groups (e.g., healthcare providers, users, and policy-makers).                                                                                                                                                                                                                                          | 12-14                                                       |
| Limitations                    | 25   | Discuss limitations at study and outcome level (e.g., risk of bias), and at review level (e.g., incomplete retrieval of identified research, reporting bias). <i>Comment on the validity of the assumptions, such as transitivity and consistency. Comment on any concerns regarding network geometry (e.g., avoidance of certain comparisons).</i>                                                                            | 15                                                          |
| Conclusions                    | 26   | Provide a general interpretation of the results in the context of other evidence, and implications for future research.                                                                                                                                                                                                                                                                                                        | 15                                                          |
| <b>FUNDING</b>                 |      |                                                                                                                                                                                                                                                                                                                                                                                                                                |                                                             |
| Funding                        | 27   | Describe sources of funding for the systematic review and other support (e.g., supply of data); role of funders for the systematic review. This should also include information regarding whether funding has been received from manufacturers of treatments in the network and/or whether some of the authors are content experts with professional conflicts of interest that could affect use of treatments in the network. | 17                                                          |

**Table S2.Study and Patient Characteristics**

| Study         | Trial name    | NCTnumber   | Phase | Tumor type | Region | line of treatment | Disease Stage                                | Treatment           | Sample Size | Age (range) | male (n,%) | Follow-up (months) | pulmonary metastasis | Previous radiation therapy | Former smoker | Current smoker |
|---------------|---------------|-------------|-------|------------|--------|-------------------|----------------------------------------------|---------------------|-------------|-------------|------------|--------------------|----------------------|----------------------------|---------------|----------------|
| Ascierto,2020 | CheckMate 238 | NCT02388906 | III   | Melanoma   | NA     | NA                | Stage IIIB, IIIC, or IV                      | Niv 3mg/kg q2w      | 453         | 56 (19-83)  | 258 (57.0) | 51.1               | NA                   | NA                         | NA            | NA             |
|               |               |             |       |            |        |                   |                                              | Ipi 10mg/kg q3w     | 453         | 54 (18-86)  | 269 (59.4) | 51.1               | NA                   | NA                         | NA            | NA             |
| Bellmunt,2021 | IMvigor010    | NCT02450331 | III   | UC         | MN     | all               | M0 and either ypT2-4a or ypN+                | Ate 1200mg q3w      | 406         | 67 (60-72)  | 322 (79)   | 21.9               | NA                   | NA                         | NA            | NA             |
|               |               |             |       |            |        |                   |                                              | Placebo             | 403         | 66 (60-73)  | 316 (78)   | 21.9               | NA                   | NA                         | NA            | NA             |
| Emens,2021    | IMpassion130  | NCT02425891 | III   | TNBC       | MN     | all               | Unresectable, locally advanced or metastatic | Ate 840mg q2w+Chemo | 451         | 55 (46-64)  | 3 (1)      | 18.8               | 226 (50.1)           | 268 (59.4)                 | NA            | NA             |
|               |               |             |       |            |        |                   |                                              | Chemo               | 451         | 56 (47-65)  | 1 (<1)     | 18.8               | 242 (53.7)           | 280 (62.1)                 | NA            | NA             |

|                    |                  |                 |     |       |    |    |                                          |                               |     |                 |               |      |               |                  |    |    |
|--------------------|------------------|-----------------|-----|-------|----|----|------------------------------------------|-------------------------------|-----|-----------------|---------------|------|---------------|------------------|----|----|
| Chen,2020          | ATTRACTI<br>ON-2 | NCT02267<br>343 | III | G/GEJ | MN | ≥2 | Unresectable<br>advanced or<br>recurrent | Niv 3mg/kg q2w                | 330 | 62<br>(54-69)   | 229<br>(69)   | 27.3 | 18<br>(5%)    | NA               | NA | NA |
|                    |                  |                 |     |       |    |    |                                          | Placebo                       | 163 | 61<br>(53-68)   | 119<br>(73)   | 27.3 | 6 (4%)        | NA               | NA | NA |
| 1Choueiri,20<br>21 | CheckMate<br>9ER | NCT03141<br>177 | III | RCC   | MN | 1  | Advanced                                 | Niv 240mg<br>q2w+Cabozantinib | 323 | 62<br>(29-90)   | 249<br>(77.1) | 18.1 | 238<br>(73.7) | 46<br>(14.2<br>) | NA | NA |
|                    |                  |                 |     |       |    |    |                                          | Sunitinib                     | 328 | 61<br>(28-86)   | 232<br>(70.7) | 18.1 | 249<br>(75.9) | 45<br>(13.7<br>) | NA | NA |
| Cortes,2020        | KEYNOTE-<br>355  | NCT02819<br>518 | III | TNBC  | MN | 1  | Locally recurrent                        | Pem 200mg<br>q3w+Chemo        | 566 | 53<br>(44-63)   | NA            | 25.9 | 324<br>(57%)  | NA               | NA | NA |
|                    |                  |                 |     |       |    |    |                                          | Chemo                         | 281 | 53<br>(43-63)   | NA            | 26.3 | 162<br>(58%)  | NA               | NA | NA |
| Finn,2020          | KEYNOTE-<br>240  | NCT02702<br>401 | III | HCC   | MN | 2  | Stage C disease<br>or stage              | Pem 200mg q3w                 | 278 | 67<br>(18-91)   | 226<br>(81.3) | 13.8 | NA            | NA               | NA | NA |
|                    |                  |                 |     |       |    |    |                                          | Placebo                       | 135 | 65<br>(23-89)   | 112<br>(83)   | 10.6 | NA            | NA               | NA | NA |
| Fuchs,2020         | KEYNOTE-<br>061  | NCT02370<br>498 | III | G/GEJ | MN | ≥2 | Advanced                                 | Pem 200mg q3w                 | 296 | 62.5<br>(54-70) | 202<br>(68)   | 27   | NA            | NA               | NA | NA |
|                    |                  |                 |     |       |    |    |                                          | Paclitaxel                    | 296 | 60.0<br>(53-68) | 208<br>(70)   | 27   | NA            | NA               | NA | NA |

|              |              |             |     |          |       |   |                                            |                                                |     |                     |               |      |              |              |               |              |
|--------------|--------------|-------------|-----|----------|-------|---|--------------------------------------------|------------------------------------------------|-----|---------------------|---------------|------|--------------|--------------|---------------|--------------|
| Gutzmer,2020 | IMspire150   | NCT02908672 | III | Melanoma | MN    | 1 | Stage IIIc-IV                              | Ate 840mg q2w+<br>Cobimetinib +<br>Vemurafenib | 256 | 54.0<br>(44.8-64.0) | 150<br>(59)   | 18.9 | NA           | NA           | NA            | NA           |
|              |              |             |     |          |       |   |                                            | placebo+ Cobimetinib +<br>Vemurafenib          | 258 | 53.5<br>(43.0-63.8) | 149<br>(58)   | 18.9 | NA           | NA           | NA            | NA           |
| Herbst,2020  | IMpower110   | NCT02409342 | III | NSCLC    | MN    | 1 | Stage IV                                   | Ate 1200mg q3w                                 | 277 | 64<br>(30-81)       | 196<br>(70.8) | 13.4 | NA           | NA           | 166<br>(59.9) | 74<br>(26.7) |
|              |              |             |     |          |       |   |                                            | Chemo                                          | 277 | 65<br>(30-87)       | 193<br>(69.7) | 13.4 | NA           | NA           | 161<br>(58.1) | 81<br>(29.2) |
| Hodi,2018    | CheckMate067 | NCT01844505 | III | Melanoma | MN    | 1 | Stage III<br>(unresectable) or<br>stage IV | Niv 1mg/kg q3w+Ipi3<br>mg/kg q3w               | 314 | 61<br>(18-88)       | 206<br>(66)   | 46.9 | NA           | NA           | NA            | NA           |
|              |              |             |     |          |       |   |                                            | Niv 3mg/kg q2w                                 | 316 | 60<br>(25-90)       | 202<br>(64)   | 36   | NA           | NA           | NA            | NA           |
|              |              |             |     |          |       |   |                                            | Ipi 3mg/kg q3w                                 | 315 | 62<br>(18-89)       | 202<br>(64)   | 18.6 | NA           | NA           | NA            | NA           |
| Huang,2020   | NA           | NCT03099382 | III | OSCC     | China | 2 | Advanced or<br>metastatic                  | Cam 200mg q2w                                  | 228 | 60<br>(54-65)       | 208<br>(91)   | 8.3  | 107<br>(47%) | 155<br>(68%) | NA            | NA           |

|                |               |             |     |       |    |   |          |                                           |     |               |               |             |             |                   |            |    |
|----------------|---------------|-------------|-----|-------|----|---|----------|-------------------------------------------|-----|---------------|---------------|-------------|-------------|-------------------|------------|----|
|                |               |             |     |       |    |   |          |                                           |     |               |               |             |             | )                 |            |    |
|                |               |             |     |       |    |   |          | Chemo                                     | 220 | 60<br>(54-65) | 192<br>(87)   | 6.2         | 94<br>(43%) | 138<br>(63%)<br>) | NA         | NA |
| Janjigian,2021 | CheckMate 649 | NCT02872116 | III | G/GEJ | MN | 1 | Advanced | Niv 360mg q3w or 240mg q2w+Chemo          | 789 | 62<br>(54-69) | 540<br>(68)   | min12<br>.1 | NA          | NA                | NA         | NA |
|                |               |             |     |       |    |   |          | Chemo                                     | 792 | 61<br>(53-68) | 560<br>(71)   | min12<br>.1 | NA          | NA                | NA         | NA |
| Jotte,2020     | IMpower131    | NCT02367794 | III | NSCLC | MN | 1 | Stage IV | Ate 1200mg q3w+Carboplatin+Paclitaxel     | 338 | 64<br>(43-85) | 278<br>(82.2) | NA          | NA          | NA                | 308 (91.1) |    |
|                |               |             |     |       |    |   |          | Ate 1200mg q3w+Carboplatin+Nab-Paclitaxel | 343 | 65<br>(23-83) | 280<br>(81.6) | 26.8        | NA          | NA                | 311 (90.7) |    |
|                |               |             |     |       |    |   |          | Carboplatin+Nab-Paclitaxel                | 340 | 65<br>(38-86) | 277<br>(81.5) | 24.8        | NA          | NA                | 316 (92.9) |    |

|                 |               |             |     |                            |        |     |                                          |                     |     |            |           |      |          |          |          |    |
|-----------------|---------------|-------------|-----|----------------------------|--------|-----|------------------------------------------|---------------------|-----|------------|-----------|------|----------|----------|----------|----|
| Kuruville,2021  | KEYNOTE-204   | NCT02684292 | III | Classical Hodgkin lymphoma | MN     | all | Relapsed or refractory                   | Pem 200mg q3w       | 151 | 36 (28-53) | 84 (56)   | 25.7 | NA       | 58 (38%) | NA       | NA |
|                 |               |             |     |                            |        |     |                                          | Brentuximab Vedotin | 153 | 35 (28-50) | 90 (59)   | 25.7 | NA       | 61 (40%) | NA       | NA |
| 1Wu,2019        | CheckMate 078 | NCT02613507 | III | NSCLC                      | MN     | ≥2  | Stage IIIB or IV                         | Niv 3mg/kg q2w      | 338 | 60 (27-78) | 263 (78)  | 10.4 | NA       | NA       | 236 (70) |    |
|                 |               |             |     |                            |        |     |                                          | Docetaxel           | 166 | 60 (38-78) | 134 (81)  | 8.8  | NA       | NA       | 118 (71) |    |
| Miles,2021      | IMpassion13 1 | NCT03125902 | III | TNBC                       | Global | 1   | Unresectable locally advanced/metastatic | Chemo               | 220 | 53 (25-81) | 0         | 14.5 | 100 (45) | NA       | NA       | NA |
|                 |               |             |     |                            |        |     |                                          | Ate 840mg q2w+Chemo | 431 | 54 (22-85) | 1 (<1)    | 14.2 | 230 (53) | NA       | NA       | NA |
| Mittendorf,2020 | IMpassion03 1 | NCT03197935 | III | TNBC                       | MN     | 1   | Early-stage                              | Ate 840mg q2w+Chemo | 165 | 51 (22-76) | 165 (100) | 20.6 | NA       | NA       | NA       | NA |
|                 |               |             |     |                            |        |     |                                          | Chemo               | 168 | 51 (26-78) | 168 (100) | 19.8 | NA       | NA       | NA       | NA |
| Moore,2021      | IMagyn050     | NCT03038100 | III | OC                         | MN     | 1   | Stage III or IV                          | Ate 1200mg q3w      | 651 | 60 (29-84) | /         | 19.9 | NA       | NA       | NA       | NA |

|              |                  |                 |     |       |    |    |                                                    |                   |     |               |               |      |     |    |                   |                  |
|--------------|------------------|-----------------|-----|-------|----|----|----------------------------------------------------|-------------------|-----|---------------|---------------|------|-----|----|-------------------|------------------|
|              |                  |                 |     |       |    |    |                                                    | Chemo+Bevacizumab | 650 | 59<br>(18-83) | /             | 19.8 | NA  | NA | NA                | NA               |
| 1Motzer,2020 | CheckMate<br>025 | NCT01668<br>784 | III | RCC   | MN | ≥2 | Advanced or<br>metastatic                          | Niv 3mg/kg q2w    | 410 | 62<br>(23-88) | 315<br>(77)   | 72   | 278 | NA | NA                | NA               |
|              |                  |                 |     |       |    |    |                                                    | Everolimus        | 411 | 62<br>(18-86) | 304<br>(74)   | 72   | 274 | NA | NA                | NA               |
| Fradet,2019  | KEYNOTE-<br>045  | NCT02256<br>436 | III | UC    | MN | 2  | Advanced                                           | Pem 200mg q3w     | 270 | 67<br>(29-88) | 200<br>(74.1) | 27.7 | NA  | NA | 136<br>(50.4<br>) | 29<br>(10.7<br>) |
|              |                  |                 |     |       |    |    |                                                    | Chemo             | 272 | 65<br>(26-84) | 202<br>(74.3) | 27.7 | NA  | NA | 148<br>(54.4<br>) | 38<br>(14.0<br>) |
| Antonia,2017 | PACIFIC          | NCT02125<br>461 | III | NSCLC | MN | ≥2 | Stage III                                          | Dur 10mg/kg q2w   | 473 | 64<br>(31-84) | 334<br>(70.2) | 14.5 | NA  | NA | 354<br>(74.4<br>) | 79<br>(16.6<br>) |
|              |                  |                 |     |       |    |    |                                                    | Placebo           | 236 | 63<br>(23-90) | 166<br>(70.0) | 14.5 | NA  | NA | 98<br>(41.4<br>)  | 38<br>(16.0<br>) |
| 1Powles,2020 | DANUBE           | NCT02516<br>241 | III | UC    | MN | 1  | Unresectable,<br>locally advanced<br>or metastatic | Dur 1500mg q4w    | 346 | 67<br>(60-73) | 249<br>(72)   | 41.2 | NA  | NA | 159<br>(46)       | 60<br>(17)       |



|              |                  |                 |     |                  |    |    |           |                                |     |                 |               |      |              |              |             |            |
|--------------|------------------|-----------------|-----|------------------|----|----|-----------|--------------------------------|-----|-----------------|---------------|------|--------------|--------------|-------------|------------|
|              |                  |                 |     |                  |    |    |           | Dur 1500mg q4w+Tre<br>75mg q4w | 342 | 68<br>(60-73)   | 256<br>(75)   | 41.2 | 186<br>(54)  | NA           | 176<br>(51) | 66<br>(19) |
|              |                  |                 |     |                  |    |    |           | Chemo                          | 344 | 68<br>(60-73)   | 274<br>(80)   | 41.2 | 178<br>(52)  | NA           | 178<br>(52) | 61<br>(18) |
| 2Powles,2020 | KEYNOTE-<br>426  | NCT02853<br>331 | III | RCC              | MN | 1  | Advanced  | Pem 200mg<br>q3w+Axitinib      | 432 | 62<br>(55-68)   | 308<br>(71)   | 30.6 | 312<br>(72%) | 41<br>(9%)   | NA          | NA         |
|              |                  |                 |     |                  |    |    |           | Sunitinib                      | 429 | 61<br>(53-68)   | 320<br>(75)   | 30.6 | 309<br>(72%) | 40<br>(9%)   | NA          | NA         |
| Powles,2021  | KEYNOTE-<br>361  | NCT02853<br>305 | III | UC               | MN | 1  | Advanced  | Pem 200mg<br>q3w+Chemo         | 351 | 69<br>(62-75)   | 272<br>(78)   | 31.7 | NA           | NA           | NA          | NA         |
|              |                  |                 |     |                  |    |    |           | Pem 200mg q3w                  | 307 | 68<br>(61-74)   | 228<br>(74)   | 31.7 | NA           | NA           | NA          | NA         |
|              |                  |                 |     |                  |    |    |           | Chemo                          | 352 | 69<br>(61-75)   | 262<br>(74)   | 31.7 | NA           | NA           | NA          | NA         |
| Reardon,2020 | CheckMate<br>143 | NCT02017<br>717 | III | Glioblasto<br>ma | MN | ≥2 | Recurrent | Niv 3mg/kg q2w                 | 184 | 55.5<br>(22-77) | 116<br>(63.0) | 9.5  | NA           | 184<br>(100) | NA          | NA         |
|              |                  |                 |     |                  |    |    |           | Bevacizumab                    | 185 | 55.0<br>(22-76) | 119<br>(64.3) | 9.5  | NA           | 185<br>(100) | NA          | NA         |

|            |                   |                 |     |       |    |   |                                    |                                       |     |                 |               |       |    |    |                   |                   |
|------------|-------------------|-----------------|-----|-------|----|---|------------------------------------|---------------------------------------|-----|-----------------|---------------|-------|----|----|-------------------|-------------------|
| Reck,2021  | CheckMate<br>9LA  | NCT03215<br>706 | III | NSCLC | MN | 1 | Advanced(stage<br>IV or recurrent) | Niv 360mg q2w+Ipi<br>1mg/kg q6w+Chemo | 361 | 65<br>(35-81)   | 252<br>(70)   | min24 | NA | NA | 315 (87)          |                   |
|            |                   |                 |     |       |    |   |                                    | Chemo                                 | 358 | 65<br>(26-86)   | 252<br>(70)   | min24 | NA | NA | 306 (86)          |                   |
| Rizvi,2020 | MYSTIC            | NCT02453<br>282 | III | NSCLC | MN | 1 | Stage IV                           | Dur 20mg/kg q4w                       | 374 | 65.0<br>(28-84) | 256<br>(68.4) | 30.2  | NA | NA | 211<br>(56.4<br>) | 106<br>(28.3<br>) |
|            |                   |                 |     |       |    |   |                                    | Dur 20mg/kg q4w+Tre<br>1mg/kg q4w     | 372 | 66.0<br>(28-87) | 266<br>(71.5) | 30.2  | NA | NA | 233<br>(62.6<br>) | 83<br>(22.3<br>)  |
|            |                   |                 |     |       |    |   |                                    | Chemo                                 | 372 | 64.0<br>(30-85) | 250<br>(67.2) | 30.2  | NA | NA | 227<br>(61.0<br>) | 93<br>(25.0<br>)  |
| Rudin,2020 | KEYNOTE-<br>604   | NCT03066<br>778 | III | SCLC  | MN | 1 | Sstage IV                          | Pem 200mg q3w                         | 228 | 64<br>(24-81)   | 152<br>(66.7) | 30.5  | NA | NA | 72<br>(31.6<br>)  | 148<br>(64.9<br>) |
|            |                   |                 |     |       |    |   |                                    | Etoposide                             | 225 | 65<br>(37-83)   | 142<br>(63.1) | 30.5  | NA | NA | 84<br>(37.3<br>)  | 133<br>(59.1<br>) |
| Sezer,2021 | Empwer-Lun<br>g 1 | NCT03088<br>540 | III | NSCLC | MN | 1 | Advanced                           | Cem 350mg q3w                         | 356 | 63<br>(58-69)   | 312<br>(88)   | 13.1  | NA | NA | 223<br>(63%)      | 133<br>(37%)      |

|               |             |             |     |                    |    |   |                                              |                     |     |                 |               |      |    |    |               |              |
|---------------|-------------|-------------|-----|--------------------|----|---|----------------------------------------------|---------------------|-----|-----------------|---------------|------|----|----|---------------|--------------|
|               |             |             |     |                    |    |   |                                              |                     |     |                 |               |      |    |    | )             | )            |
|               |             |             |     |                    |    |   |                                              | Chemo               | 354 | 64<br>(57-69)   | 294<br>(83)   | 13.1 | NA | NA | 234<br>(66%)  | 120<br>(34%) |
| Shitara,2020  | KEYNOTE-062 | NCT02494583 | III | Gastric Cancer     | MN | 1 | Advanced                                     | Pem 200mg q3w       | 256 | 61<br>(20-83)   | 180<br>(70.3) | 29.4 | NA | NA | NA            | NA           |
|               |             |             |     |                    |    |   |                                              | Pem 200mg q3w+Chemo | 257 | 62<br>(22-83)   | 195<br>(75.9) | 29.4 | NA | NA | NA            | NA           |
|               |             |             |     |                    |    |   |                                              | Chemo               | 250 | 62.5<br>(23-87) | 179<br>(71.6) | 29.4 | NA | NA | NA            | NA           |
| Sugawara,2021 | ONO-4538-52 | NCT03117049 | III | NSCLC              | MN | 1 | Stage IIIB/IV or recurrent                   | Niv 360mg q3w       | 275 | 66<br>(27-85)   | 205<br>(74.5) | 13.7 | NA | NA | 196<br>(71.3) | 18<br>(6.5)  |
|               |             |             |     |                    |    |   |                                              | Placebo             | 275 | 66<br>(33-83)   | 206<br>(74.9) | 13.7 | NA | NA | 200<br>(72.7) | 21<br>(7.6)  |
| Sun2021       | KEYNOTE-590 | NCT03189719 | III | Oesophageal cancer | MN | 1 | Locally advanced, unresectable or metastatic | Pem 200mg q3w       | 373 | 64<br>(28-94)   | 306<br>(82)   | 22.6 | NA | NA | NA            | NA           |
|               |             |             |     |                    |    |   |                                              | Chemo               | 376 | 62<br>(27-89)   | 319<br>(85)   | 22.6 | NA | NA | NA            | NA           |

|            |             |             |     |       |       |    |                             |                                          |     |               |               |      |             |             |               |              |
|------------|-------------|-------------|-----|-------|-------|----|-----------------------------|------------------------------------------|-----|---------------|---------------|------|-------------|-------------|---------------|--------------|
| Winer2021  | KEYNOTE-119 | NCT02555657 | III | TNBC  | MN    | ≥2 | Metastatic                  | Pem 200mg q3w                            | 312 | 50<br>(43-59) | 0             | 31.4 | NA          | NA          | NA            | NA           |
|            |             |             |     |       |       |    |                             | Chemo                                    | 310 | 53<br>(44-61) | 2 (1)         | 31.5 | NA          | NA          | NA            | NA           |
| Yang,2021  | CAPTAIN-1st | NCT03707509 | III | NC    | China | 1  | Recurrent or metastatic     | Cam 200mg q3w+Gemcitabine and Cisplatin  | 134 | 52<br>(40-58) | 113<br>(84)   | 10.2 | 66<br>(49%) | 86<br>(64%) | NA            | NA           |
|            |             |             |     |       |       |    |                             | Gemcitabine and Cisplatin                | 129 | 49<br>(40-56) | 105<br>(81)   | 10.2 | 61<br>(47%) | 83<br>(64%) | NA            | NA           |
| 1Zhou,2021 | ORIENT-12   | NCT03629925 | III | NSCLC | China | 1  | Stage IIIB/IIIC or stage IV | Sin 200mg q3w+GP                         | 179 | 64<br>(39-75) | 163<br>(91.1) | 12.9 | NA          | 8<br>(4.5)  | 103<br>(57.5) | 52<br>(29.1) |
|            |             |             |     |       |       |    |                             | GP                                       | 178 | 62<br>(33-75) | 164<br>(92.1) | 12.9 | NA          | 4<br>(2.2)  | 97<br>(54.5)  | 50<br>(28.1) |
| 2Zhou,2021 | CameL       | NCT03134872 | III | NSCLC | China | 1  | Advanced                    | Cam 200mg q3w+Carboplatin and Pemetrexed | 205 | 59<br>(54-64) | 146<br>(71)   | 11.9 | NA          | NA          | NA            | NA           |
|            |             |             |     |       |       |    |                             | Chemo                                    | 207 | 61<br>(53-65) | 149<br>(72)   | 11.9 | NA          | NA          | NA            | NA           |

|               |                  |                 |     |          |     |     |                       |                 |     |                 |               |       |    |                  |                   |                  |
|---------------|------------------|-----------------|-----|----------|-----|-----|-----------------------|-----------------|-----|-----------------|---------------|-------|----|------------------|-------------------|------------------|
| Ferris,2017   | CheckMate<br>141 | NCT02105<br>636 | III | HNSCC    | all | ≥2  | Recurrent             | Niv 3mg/kg q2w  | 240 | 59<br>(29-83)   | 197<br>(82.1) | 5.1   | NA | NA               | 191 (79.6)        |                  |
|               |                  |                 |     |          |     |     |                       | Chemo           | 121 | 61<br>(28-78)   | 103<br>(85.1) | 5.1   | NA | NA               | 85 (70.2)         |                  |
| Brahmer,2015  | CheckMate<br>017 | NCT01642<br>004 | III | NSCLC    | all | 2   | Stage IIIB or IV      | Niv 3mg/kg q2w  | 135 | 62<br>(39-85)   | 111<br>(82)   | min11 | NA | NA               | 121 (90)          |                  |
|               |                  |                 |     |          |     |     |                       | Chemo           | 137 | 64<br>(42-84)   | 97<br>(71)    | min11 | NA | NA               | 129 (94)          |                  |
| Borghaei,2015 | CheckMate<br>057 | NCT01673<br>867 | III | NSCLC    | NA  | ≥2  | Stage IIIB or IV      | Niv 3mg/kg q2w  | 292 | 61<br>(37-84)   | 151<br>(52)   | 13.2  | NA | 19<br>(12.6<br>) | 231 (79)          |                  |
|               |                  |                 |     |          |     |     |                       | Chemo           | 290 | 64<br>(21-85)   | 168<br>(58)   | 13.2  | NA | NA               | 227 (78)          |                  |
| Reck,2019     | KEYNOTE-<br>024  | NCT21427<br>38  | III | NSCLC    | MN  | 1   | untreated stage<br>IV | Pem 200mg q3w   | 154 | 64.5<br>(33-90) | 92<br>(59.7)  | 25.2  | NA | NA               | 115<br>(74.7<br>) | 34<br>(22.1<br>) |
|               |                  |                 |     |          |     |     |                       | Chemo           | 151 | 66.0<br>(38-85) | 95<br>(62.9)  | 25.2  | NA | NA               | 101<br>(66.9<br>) | 31<br>(20.5<br>) |
| 1Robert,2015  | KEYNOTE-<br>006  | NCT01866<br>319 | III | Melanoma | MN  | all | Stage III or IV       | Pem 10mg/kg q2w | 279 | 61<br>(18-89)   | 161<br>(58)   | 7.9   | NA | NA               | NA                | NA               |
|               |                  |                 |     |          |     |     |                       | Pem 10mg/kg q3w | 277 | 63<br>(22-89)   | 174<br>(63)   | 7.9   | NA | NA               | NA                | NA               |

|                       |                  |                 |     |       |            |    |                                      |                        |     |                         |               |       |    |                 |                   |                   |
|-----------------------|------------------|-----------------|-----|-------|------------|----|--------------------------------------|------------------------|-----|-------------------------|---------------|-------|----|-----------------|-------------------|-------------------|
|                       |                  |                 |     |       |            |    |                                      | Ipi 3 mg/kg q3w        | 278 | 62<br>(18-88)           | 162<br>(58)   | 7.9   | NA | NA              | NA                | NA                |
| Carbone,2017          | CheckMate<br>026 | NCT20415<br>33  | III | NSCLC | MN         | 1  | Stage IV or<br>Recurrent             | Niv 3mg/kg q2w         | 271 | 63<br>(32-89)           | 184<br>(68)   | 13.5  | NA | 102<br>(38)     | 186<br>(69)       | 52<br>(19)        |
|                       |                  |                 |     |       |            |    |                                      | Chemo                  | 270 | 65<br>(29-87)           | 148<br>(55)   | 13.5  | NA | 107<br>(40)     | 182<br>(67)       | 55<br>(20)        |
| Fehrenbacher,<br>2018 | OAK              | NCT02008<br>227 | III | NSCLC | MN         | ≥2 | Stage IIIB or IV                     | Ate 1200mg q3w         | 613 | 63.0<br>(25-84)         | 379<br>(61.8) | min26 | NA | NA              | 418<br>(68.2<br>) | 83<br>(13.5<br>)  |
|                       |                  |                 |     |       |            |    |                                      | Docetaxel              | 612 | 64.0<br>(34-85)         | 379<br>(61.9) | min21 | NA | NA              | 409<br>(66.8<br>) | 107<br>(17.5<br>) |
| Paz-Ares,201<br>8     | KEYNOTE-<br>407  | NCT02775<br>435 | III | NSCLC | MN         | 1  | Stage IV                             | Pem 200mg<br>q3w+Chemo | 278 | 65<br>(29-87)           | 220<br>(79.1) | 7.8   | NA | NA              | 256 (92.1)        |                   |
|                       |                  |                 |     |       |            |    |                                      | Chemo                  | 281 | 65<br>(36-88)           | 235<br>(83.6) | 7.8   | NA | NA              | 262 (93.2)        |                   |
| Mok,2019              | KEYNOTE-<br>042  | NCT02220<br>894 | III | NSCLC | Glo<br>bal | 1  | Locally<br>advanced or<br>metastatic | Pem 200mg q3w          | 637 | 63.0<br>(57.0-69.<br>0) | 450<br>(71)   | 12.8  | NA | 75<br>(12%<br>) | 370<br>(58%<br>)  | 125<br>(20%<br>)  |
|                       |                  |                 |     |       |            |    |                                      | Chemo                  | 637 | 63.0<br>(57.0-69.<br>0) | 452<br>(71)   | 12.8  | NA | 81<br>(13%<br>) | 351<br>(55%<br>)  | 146<br>(23%<br>)  |

|                |               |             |     |          |     |    |                       |                               |     |                  |            |      |    |    |            |           |
|----------------|---------------|-------------|-----|----------|-----|----|-----------------------|-------------------------------|-----|------------------|------------|------|----|----|------------|-----------|
| Paz-Ares,2019  | CASPIAN       | NCT03043872 | III | SCLC     | MN  | 1  | Stage IV              | Dur 1500mg q4w+Chemo          | 268 | 62 (58-68)       | 190 (71)   | 14.2 | NA | NA | 126 (47%)  | 120 (45%) |
|                |               |             |     |          |     |    |                       | Chemo                         | 269 | 63 (57-68)       | 184 (68)   | 14.2 | NA | NA | 128 (48%)  | 126 (47%) |
| Hellmann,2018  | CheckMate 227 | NCT02477826 | III | NSCLC    | all | 1  | Stage IV or recurrent | Niv 1mg/kg q2w+Ipi 1mg/kg q6w | 583 | 64 (26-87)       | 391 (67)   | 11.2 | NA | NA | 85         |           |
|                |               |             |     |          |     |    |                       | Niv 240mg q2w                 | 396 | 64 (27-85)       | 273 (68)   | 11.2 | NA | NA | 86         |           |
|                |               |             |     |          |     |    |                       | Chemo                         | 583 | 64               | 385 (66)   | 11.2 | NA | NA | 86         |           |
| Gandhi,2018    | KEYNOTE-189   | NCT02578680 | III | NSCLC    | MN  | 1  | Metastatic            | Pem 200mg q3w+Chemo           | 410 | 65.0 (34.0-84.0) | 254 (62.0) | 10.5 | NA | NA | 362 (88.3) |           |
|                |               |             |     |          |     |    |                       | Chemo                         | 206 | 63.5 (34.0-84.0) | 109 (52.9) | 10.5 | NA | NA | 181 (87.9) |           |
| Eggermont,2015 | EORTC 18071   | NCT00636168 | III | Melanoma | MN  | ≥2 | Stage III             | Ipi 10 mg/kg q3w              | 475 | 51 (20-84)       | 296 (62)   | 32.9 | NA | NA | NA         | NA        |
|                |               |             |     |          |     |    |                       | Placebo                       | 476 | 52               | 293        | 32.9 | NA | NA | NA         | NA        |

|                    |                 |                 |     |          |    |     |                                 |                              |     |                 |               |      |    |    |     |    |
|--------------------|-----------------|-----------------|-----|----------|----|-----|---------------------------------|------------------------------|-----|-----------------|---------------|------|----|----|-----|----|
|                    |                 |                 |     |          |    |     |                                 |                              |     | (18-78)         | (62)          |      |    |    |     |    |
| Eng,2019           | IMblaze370      | NCT02788<br>279 | III | CRC      | MN | ≥2  | Advanced or                     | Ate 840mg<br>q2w+Cobimetinib | 183 | 58<br>(51-67)   | 107<br>(58)   | 7.3  | NA | NA | NA  | NA |
|                    |                 |                 |     |          |    |     |                                 | Ate 1200mg q3w               | 90  | 56<br>(51-64)   | 59<br>(66)    | 7.3  | NA | NA | NA  | NA |
|                    |                 |                 |     |          |    |     |                                 | Regorafenib                  | 90  | 59<br>(52-66)   | 51<br>(57)    | 7.3  | NA | NA | NA  | NA |
| Cohen,2019         | KEYNOTE-<br>040 | NCT02252<br>042 | III | HNSCC    | MN | ≥2  | Recurrent or<br>metastatic      | Pem 200mg q3w                | 247 | 60.0<br>(55-66) | 207<br>(84)   | 7.5  | NA | NA | 147 | 32 |
|                    |                 |                 |     |          |    |     |                                 | Placebo                      | 248 | 60.0<br>(54-66) | 205<br>(83)   | 7.1  | NA | NA | 146 | 36 |
| Eggermont,20<br>18 | KEYNOTE-<br>054 | NCT02362<br>594 | III | Melanoma | MN | 1   | Stage III                       | Pem 200mg q3w                | 514 | 54<br>(19-88)   | 324<br>(63.0) | 15   | NA | NA | NA  | NA |
|                    |                 |                 |     |          |    |     |                                 | Placebo                      | 505 | 54<br>(19-83)   | 304<br>(60.2) | 15   | NA | NA | NA  | NA |
| Long,2019          | KEYNOTE-<br>252 | NCT02752<br>074 | III | Melanoma | MN | all | Unresectable<br>stage III or IV | Pem 200mg<br>q3w+Epacadostat | 354 | 64<br>(52-72)   | 217<br>(61)   | 12.4 | NA | NA | NA  | NA |
|                    |                 |                 |     |          |    |     |                                 | Pem 200mg q3w                | 352 | 63<br>(53.5-72) | 206<br>(59)   | 12.4 | NA | NA | NA  | NA |
| Reck,2016          | CA184-156       | NCT01450<br>761 | III | SCLC     | MN | all | Extensive-stage                 | Ipi 10mg/kg<br>q3w+Chemo     | 478 | 62<br>(39-85)   | 317<br>(66)   | 10.5 | NA | NA | NA  | NA |
|                    |                 |                 |     |          |    |     |                                 | Chemo                        | 476 | 63<br>(36-81)   | 326<br>(68)   | 10.2 | NA | NA | NA  | NA |



|               |                 |                 |     |                       |            |     |                                                   |                                |     |                 |               |      |    |                  |                   |                  |
|---------------|-----------------|-----------------|-----|-----------------------|------------|-----|---------------------------------------------------|--------------------------------|-----|-----------------|---------------|------|----|------------------|-------------------|------------------|
| Socinski,2018 | IMpower150      | NCT23661<br>43  | III | NSCLC                 | MN         | 1   | Stage IV or<br>recurrent                          | Ate 1200mg<br>q3w+TTD+Chemo    | 400 | 63<br>(31-89)   | 240<br>(60.0) | 20   | NA | NA               | 228<br>(57.0<br>) | 90<br>(22.5<br>) |
|               |                 |                 |     |                       |            |     |                                                   | TTD+chemo                      | 400 | 63<br>(31-90)   | 239<br>(59.8) | 20   | NA | NA               | 231<br>(57.8<br>) | 92<br>(23.0<br>) |
| Kojima,2020   | KEYNOTE-<br>181 | NCT02564<br>263 | III | Esophagea<br>l Cancer | Glo<br>bal | all | Etastatic or<br>locally advanced,<br>unresectable | Pem 200mg q3w                  | 314 | 63.0<br>(23-84) | 273<br>(86.9) | 7.1  | NA | NA               | NA                | NA               |
|               |                 |                 |     |                       |            |     |                                                   | Chemo                          | 314 | 62.0<br>(24-84) | 271<br>(86.3) | 6.9  | NA | NA               | NA                | NA               |
| Finns,2020    | IMbrave-150     | NCT03434<br>379 | III | HCC                   | Glo<br>bal | 1   | Unresectable                                      | Ate 1200mg q3w                 | 336 | 64<br>(56-71)   | 277<br>(82)   | 8.9  | NA | NA               | NA                | NA               |
|               |                 |                 |     |                       |            |     |                                                   | Sorafenib                      | 165 | 66<br>(59-71)   | 137<br>(83)   | 8.1  | NA | NA               | NA                | NA               |
| Yang,2019     | CAURAL          | NCT02454<br>933 | III | NSCLC                 | MN         | all | Stage IIIB-IV                                     | Osimertinib                    | 17  | 65<br>(41-80)   | 4 (24)        | 23.9 | NA | NA               | 4                 | 0                |
|               |                 |                 |     |                       |            |     |                                                   | Dur 10mg/kg<br>q2w+Osimertinib | 12  | 56<br>(41-78)   | 6 (50)        | 17.1 | NA | NA               | 3                 | 1                |
| Horn,2018     | IMpower133      | NCT27635<br>79  | III | SCLC                  | MN         | 1   | Extensive-stage                                   | Ate 1200mg<br>q3w+Chemo        | 201 | 64<br>(28-90)   | 129<br>(64.2) | 13.9 | NA | 25<br>(12.4<br>) | 118<br>(58.7<br>) | 74<br>(36.8<br>) |
|               |                 |                 |     |                       |            |     |                                                   | Chemo                          | 202 | 64              | 132           | 13.9 | NA | 28               | 124               | 75               |

|                |                         |             |     |          |       |    |                                               |                                |     |                 |               |     |    |            |              |              |
|----------------|-------------------------|-------------|-----|----------|-------|----|-----------------------------------------------|--------------------------------|-----|-----------------|---------------|-----|----|------------|--------------|--------------|
|                |                         |             |     |          |       |    |                                               |                                |     | (26-87)         | (65.3)        |     |    | (13.9)     | (61.4)       | (37.1)       |
| Owonikoko,2021 | CheckMate 451           | NCT02538666 | III | SCLC     | MN    | ≥2 | Extensive-Disease                             | Niv 1mg/kg q3w+ Ipi 3mg/kg q3w | 279 | 64.0<br>(39-85) | 180<br>(64.5) | 8.4 | NA | NA         | 257 (92.1)   |              |
|                |                         |             |     |          |       |    |                                               | Niv 240mg q2w                  | 280 | 65.0<br>(32-84) | 177<br>(63)   | 9.9 | NA | NA         | 257 (91.8)   |              |
|                |                         |             |     |          |       |    |                                               | Placebo                        | 275 | 64.0<br>(44-84) | 175<br>(63.6) | 9.1 | NA | NA         | 259 (94.2)   |              |
| 2Wu,2020       | KEYNOTE-042 China Study | NCT03850444 | III | NSCLC    | china | 1  | PD-L1-positive locally advanced or metastatic | Pem 200mg q3w                  | 128 | 62<br>(22-78)   | 105<br>(82)   | 33  | NA | 6<br>(4.7) | 69<br>(53.9) | 28<br>(21.9) |
|                |                         |             |     |          |       |    |                                               | Chemo                          | 134 | 62<br>(32-82)   | 119<br>(88.8) | 33  | NA | 4<br>(3.0) | 77<br>(57.5) | 29<br>(21.6) |
| Gogas,2020     | IMspire170              | NCT03273153 | III | Melanoma | MN    | 1  | Locally advanced and                          | Pem 200mg q3w                  | 224 | 66<br>(55-73)   | 141<br>(62.9) | 7.2 | NA | NA         | NA           | NA           |
|                |                         |             |     |          |       |    |                                               | Ate 840mg q2w+TTD              | 222 | 66<br>(54-73)   | 129<br>(58.1) | 7.1 | NA | NA         | NA           | NA           |

|               |                  |             |     |       |    |     |                                                 |                     |     |                   |               |      |    |    |              |             |
|---------------|------------------|-------------|-----|-------|----|-----|-------------------------------------------------|---------------------|-----|-------------------|---------------|------|----|----|--------------|-------------|
| Powers,2018   | IMvigor211       | NCT02302807 | III | UC    | MN | ≥2  | Platinum-treated locally advanced or metastatic | Ate 1200mg q3w      | 467 | 67<br>(33-88)     | 357<br>(76)   | 17.3 | NA | NA | 266<br>(57%) | 60<br>(13%) |
|               |                  |             |     |       |    |     |                                                 | Chemo               | 464 | 67<br>(31-84)     | 361<br>(78)   | 17.3 | NA | NA | 280<br>(61%) | 60<br>(13%) |
| Barlesi,2018  | JAVELIN Lung 200 | NCT02395172 | III | NSCLC | MN | ≥2  | Platinum-treated advanced                       | Ave 10mg/kg q2w     | 396 | 64<br>(58-69)     | 269<br>(68)   | 18.9 | NA | NA | 324 (82%)    |             |
|               |                  |             |     |       |    |     |                                                 | Docetaxel           | 396 | 63<br>(57-69)     | 273<br>(69)   | 17.8 | NA | NA | 333 (84%)    |             |
| Burtness,2019 | KEYNOTE-048      | NCT02358031 | III | HNSCC | MN | 1   | Recurrent or metastatic                         | Pem 200mg q3w       | 301 | 62<br>(56-68)     | 250<br>(83)   | 11.5 | NA | NA | 239 (79%)    |             |
|               |                  |             |     |       |    |     |                                                 | Pem 200mg q3w+Chemo | 281 | 61<br>(55-68)     | 224<br>(80)   | 13   | NA | NA | 224 (80%)    |             |
|               |                  |             |     |       |    |     |                                                 | TTD+Chemo           | 300 | 61<br>(54.5-68.0) | 261<br>(87)   | 10.7 | NA | NA | 234 (78%)    |             |
| Bajorin,2021  | CheckMate 274    | NCT02632409 | III | UC    | MN | all | A high risk of recurrence                       | Niv 240mg q2w       | 353 | 65.3<br>(30-92)   | 265<br>(75.1) | 20.9 | NA | NA | 237          |             |
|               |                  |             |     |       |    |     |                                                 | Placebo             | 356 | 65.9              | 275           | 19.5 | NA | NA | 247          |             |

|                |             |             |     |                        |       |    |                                                  |                                              |     |               |               |      |    |              |               |              |
|----------------|-------------|-------------|-----|------------------------|-------|----|--------------------------------------------------|----------------------------------------------|-----|---------------|---------------|------|----|--------------|---------------|--------------|
|                |             |             |     |                        |       |    |                                                  |                                              |     | (42-88)       | (77.2)        |      |    |              |               |              |
| Fennell,2021   | CONFIRM     | NCT03063450 | III | Malignant mesothelioma | UK    | ≥2 | Relapsed                                         | Niv 240mg q2w                                | 221 | 70<br>(65-74) | 167<br>(76)   | 11.6 | NA | NA           | 105<br>(48%)  | 15<br>(7%)   |
|                |             |             |     |                        |       |    |                                                  | Placebo                                      | 111 | 71<br>(65-76) | 86<br>(78)    | 11.6 | NA | NA           | 52<br>(47%)   | 6<br>(5%)    |
| Boyer,2021     | KEYNOTE-598 | NCT03302234 | III | NSCLC                  | MN    | 1  | Stage IV                                         | Pem 200mg q3w+Ipi 1mg/kg q6w                 | 284 | 64<br>(35-85) | 202<br>(71.1) | 20.6 | NA | 60<br>(21.1) | 197<br>(69.4) | 58<br>(20.4) |
|                |             |             |     |                        |       |    |                                                  | Pem 200mg q3w                                | 284 | 65<br>(35-85) | 191<br>(67.3) | 20.6 | NA | 57<br>(20.1) | 183<br>(64.4) | 76<br>(26.8) |
| Usmani,2019    | KEYNOTE-185 | NCT02579863 | III | Multiple myeloma       | MN    | 1  | Newly diagnosed,treatment-naive, active multiple | Pem 200mg q3w+Lenalidomide and Dexamethasone | 151 | 74<br>(70-79) | 70<br>(46)    | 6.6  | NA | NA           | NA            | NA           |
|                |             |             |     |                        |       |    |                                                  | Lenalidomide and Dexamethasone               | 150 | 74<br>(70-78) | 71<br>(47)    | 6.6  | NA | NA           | NA            | NA           |
| Hamanishi,2021 | NINJA       |             | III | OC                     | Japan | ≥2 | Advanced or recurrent                            | Niv 240 mg q2w                               | 157 | 58<br>(29-84) | 0             | 1    | NA | NA           | NA            | NA           |
|                |             |             |     |                        |       |    |                                                  | GEM or PLD                                   | 159 | 60<br>(34-80) | 0             | 1    | NA | NA           | NA            | NA           |

|                |               |             |     |          |       |    |                                              |                       |     |                 |               |      |    |    |            |
|----------------|---------------|-------------|-----|----------|-------|----|----------------------------------------------|-----------------------|-----|-----------------|---------------|------|----|----|------------|
| Wang,2021      | BGB-A317-307  | NCT03594747 | III | SCLC     | China | 1  | Advanced                                     | Tis 200mg q3w+PC      | 120 | 60<br>(41-74)   | 107<br>(89.2) | 8.6  | NA | NA | 96 (80.0)  |
|                |               |             |     |          |       |    |                                              | Tis 200mg q3w+nab-PC  | 119 | 63<br>(38-74)   | 112<br>(94.1) | 8.6  | NA | NA | 107 (89.9) |
|                |               |             |     |          |       |    |                                              | PC                    | 121 | 62<br>(34-74)   | 111<br>(91.7) | 8.6  | NA | NA | 98 (81.0)  |
| 2Robert,2015   | CheckMate 066 | NCT01721772 | III | Melanoma | MN    | 1  | Stage III or IV                              | Niv 3mg/kg q2w        | 210 | 64<br>(18-86)   | 121<br>(57.6) | 8.9  | NA | NA | NA NA      |
|                |               |             |     |          |       |    |                                              | Chemo                 | 208 | 66<br>(26-87)   | 125<br>(60.1) | 6.8  | NA | NA | NA NA      |
| Govindan,2017  | CA184-104     | NCT01285609 | III | NSCLC    | MN    | 1  | Stage IV                                     | Ipi 10mg/kg q3w+Chemo | 388 | 64<br>(28-84)   | 326<br>(84)   | 12.5 | NA | NA | NA NA      |
|                |               |             |     |          |       |    |                                              | Chemo                 | 361 | 64<br>(28-85)   | 309<br>(52)   | 11.8 | NA | NA | NA NA      |
| Schmid,2020    | KEYNOTE-522   | NCT03036488 | III | TNBC     | MN    | 1  | Stage II or Stage III                        | Pem 200mg q3w+Chemo   | 784 | 49<br>(22-80)   | 1 (<1)        | 15.5 | NA | NA | NA NA      |
|                |               |             |     |          |       |    |                                              | Chemo                 | 390 | 48<br>(24-79)   | 0             | 15.5 | NA | NA | NA NA      |
| Planchard,2020 | ARCTIC        | NCT02352948 | III | NSCLC    | MN    | ≥2 | Stage IIIB/IV locally advanced or metastatic | Dur 10mg/kg q2w       | 62  | 63.5<br>(35-79) | 42<br>(67.7)  | 9.1  | NA | NA | 47 (75.8)  |
|                |               |             |     |          |       |    |                                              | Soc                   | 64  | 62.0            | 48            | 9.1  | NA | NA | 45 10      |

|            |                  |                 |     |          |       |   |                  |                                   |     |                 |               |     |    |    |               |              |
|------------|------------------|-----------------|-----|----------|-------|---|------------------|-----------------------------------|-----|-----------------|---------------|-----|----|----|---------------|--------------|
|            |                  |                 |     |          |       |   |                  |                                   |     | (41-81)         | (75.0)        |     |    |    | (70.3)        | (15.6)       |
|            |                  |                 |     |          |       |   |                  | Dur 20mg/kg q4w+Tre<br>1mg/kg q4w | 174 | 62.5<br>(26-81) | 115<br>(66.1) | 9.1 | NA | NA | 109<br>(62.6) | 30<br>(17.2) |
|            |                  |                 |     |          |       |   |                  | Soc                               | 118 | 65.0<br>(42-83) | 81<br>(68.6)  | 9.1 | NA | NA | 74<br>(62.7)  | 22<br>(18.6) |
|            |                  |                 |     |          |       |   |                  | Dur 10mg/kg q2w                   | 117 | 63.0<br>(19-83) | 73<br>(62.4)  | 9.1 | NA | NA | 67<br>(57.3)  | 22<br>(18.8) |
|            |                  |                 |     |          |       |   |                  | Tre 10mg/kg q4w                   | 60  | 63.5<br>(45-81) | 39<br>(65.0)  | 9.1 | NA | NA | 38<br>(63.3)  | 8<br>(13.3)  |
| Yang,2020  | CIBI308C30<br>2  | NCT03607<br>539 | III | NSCLC    | china | 1 | Stage IIIB to IV | Sin 200mg q3w+Chemo               | 266 | 61<br>(30-75)   | 204<br>(76.7) | 8.9 | NA | NA | 122<br>(45.9) | 49<br>(18.4) |
|            |                  |                 |     |          |       |   |                  | Chemo                             | 131 | 61<br>(35-75)   | 99<br>(75.6)  | 8.9 | NA | NA | 64<br>(48.9)  | 23<br>(17.6) |
| Weber,2015 | CheckMate<br>037 | NCT01721<br>746 | III | Melanoma | MN    | 2 | Stage IIIC or IV | Niv 3mg/kg q2w                    | 272 | 59<br>(23-88)   | 176<br>(65)   | 8.4 | NA | NA | NA            |              |
|            |                  |                 |     |          |       |   |                  | Chemo                             | 133 | 62<br>(29-85)   | 85<br>(64)    | 8.4 | NA | NA | NA            | NA           |

|                      |                           |                 |     |                    |    |    |                                              |                                   |     |                 |               |      |              |    |                   |                  |
|----------------------|---------------------------|-----------------|-----|--------------------|----|----|----------------------------------------------|-----------------------------------|-----|-----------------|---------------|------|--------------|----|-------------------|------------------|
| Ferris,2020          | EAGLE                     | NCT02369<br>874 | III | HNSCC              | MN | ≥2 | progression or<br>recurrence                 | Dur 10mg/kg q2w                   | 240 | 59.0<br>(24-84) | 202<br>(84.2) | 7.6  | NA           | NA | 153<br>(63.8<br>) | 41<br>(17.1<br>) |
|                      |                           |                 |     |                    |    |    |                                              | Dur 20mg/kg q4w+Tre<br>1mg/kg q4w | 247 | 61.0<br>(23-81) | 209<br>(84.6) | 6.3  | NA           | NA | 146<br>(59.1<br>) | 45<br>(18.2<br>) |
|                      |                           |                 |     |                    |    |    |                                              | Chemo                             | 249 | 61.0<br>(22-82) | 207<br>(83.1) | 7.8  | NA           | NA | 140<br>(56.2<br>) | 56<br>(22.5<br>) |
| Pujade-Lauraine,2021 | JAVELIN<br>OVARIAN<br>200 | NCT02580<br>058 |     | OC                 | MN | ≥2 | Platinum-resistant or<br>platinum-refractory | Ave 10mg/kg q2w                   | 188 | 61<br>(53-69.5) | 0             | 18.2 | NA           | NA | NA                | NA               |
|                      |                           |                 |     |                    |    |    |                                              | Ave 10mg/kg<br>q2w+PLD            | 188 | 60<br>(53-67)   | 0             | 18.4 | NA           | NA | NA                | NA               |
|                      |                           |                 |     |                    |    |    |                                              | PLD                               | 190 | 60<br>(53-69)   | 0             | 17.4 | NA           | NA | NA                | NA               |
| Rini,2019            | IMmotion15<br>1           | NCT02420<br>821 | III | RCC                | MN | 1  | Advanced                                     | Ate 1200mg<br>q3w+Bevacizumab     | 454 | 62<br>(56-69)   | 317<br>(70)   | 24   | 339<br>(75%) | NA | NA                | NA               |
|                      |                           |                 |     |                    |    |    |                                              | Sunitinib                         | 461 | 60<br>(54-66)   | 352<br>(76)   | 24   | 325<br>(71%) | NA | NA                | NA               |
| Beer,2016            | CA184-095                 | NCT01057<br>810 | III | Prostate<br>Cancer | MN | 1  | Metastatic                                   | Ipi 10mg/kg q3w                   | 400 | 70<br>(44-91)   | 400<br>(100)  | 24   | NA           | NA | NA                | NA               |

|              |                  |                 |     |                                          |            |   |                                                  |                                                  |     |               |               |      |             |                 |                  |                 |
|--------------|------------------|-----------------|-----|------------------------------------------|------------|---|--------------------------------------------------|--------------------------------------------------|-----|---------------|---------------|------|-------------|-----------------|------------------|-----------------|
|              |                  |                 |     |                                          |            |   |                                                  | Placebo                                          | 202 | 69<br>(42-92) | 202<br>(100)  | 24   | NA          | NA              | NA               | NA              |
| Mario,2015   | CA184-024        | NCT00324<br>155 | III | Melanoma                                 | ,<br>MN    | 1 | Stage IIIc, N3<br>(unresectable), or<br>Stage IV | Ipi 10mg/kg<br>q3w+Dacarbazine                   | 250 | 57.5          | 152<br>(60.8) | 54   | NA          | NA              | NA               | NA              |
|              |                  |                 |     |                                          |            |   |                                                  | Dacarbazine                                      | 252 | 56.4          | 149<br>(59.1) | 54   | NA          | NA              | NA               | NA              |
| 2Motzer,2020 | CheckMate<br>214 | NCT02231<br>749 | III | RCC                                      | Glo<br>bal | 1 | Advanced                                         | Niv 3mg/kg q3w+Ipi<br>1mg/kg q3w                 | 550 | 62<br>(26-85) | 413<br>(75)   | 42   | 381<br>(69) | 63<br>(11)      | NA               | NA              |
|              |                  |                 |     |                                          |            |   |                                                  | Sunitinib                                        | 546 | 62<br>(21-85) | 395<br>(72)   | 42   | 373<br>(68) | 70<br>(13)      | NA               | NA              |
| West,2019    | IMpower130       | NCT02367<br>781 | III | NSCLC                                    | ,<br>MN    | 1 | Stage IV                                         | Ate 1200mg<br>q3w+carboplatin+nab-p<br>aclitaxel | 483 | 64<br>(18-86) | 277<br>(57)   | 18.5 | NA          | NA              | 323<br>(67%<br>) | 96<br>(20%<br>) |
|              |                  |                 |     |                                          |            |   |                                                  | Chemo                                            | 240 | 65<br>(38-85) | 138<br>(58)   | 18.8 | NA          | NA              | 167<br>(70%<br>) | 53<br>(22%<br>) |
| Baas,2021    | CheckMate<br>743 | NCT02899<br>299 | III | Malignant<br>pleural<br>mesothelio<br>ma | Glo<br>bal | 1 | Unresectable                                     | Niv 3mg/kg q2w+Ipi<br>1mg/kg q6w                 | 303 | 69<br>(65-75) | 234<br>(77)   | 29.7 | NA          | 29<br>(10%<br>) | 173 (57%)        |                 |
|              |                  |                 |     |                                          |            |   |                                                  | Chemo                                            | 302 | 69            | 233           | 29.7 | NA          | 28              | 171 (57%)        |                 |



|                |                           |             |     |                |        |    |                                    |                                   |     |              |            |          |          |           |           |          |
|----------------|---------------------------|-------------|-----|----------------|--------|----|------------------------------------|-----------------------------------|-----|--------------|------------|----------|----------|-----------|-----------|----------|
|                |                           |             |     |                |        |    |                                    |                                   |     | (62-75)      | (77)       |          |          | (9%)      |           |          |
| Lee,2021       | JAVELIN HEAD AND NECK 100 | NCT02952586 | III | HNSCC          | MN     | 1  | Locally advanced                   | Ave 10mg/kg q2w+Chemoradiotherapy | 350 | 60 (54-65)   | 290 (83)   | 16.7     | NA       | NA        | NA        | NA       |
|                |                           |             |     |                |        |    |                                    | Chemoradiotherapy                 | 347 | 59 (54-65)   | 285 (82)   | 16.8     | NA       | NA        | NA        | NA       |
| Moehler,2021   | JAVELIN Gastric 100       | NCT02625610 | III | Gastric Cancer | Global | 1  | Advanced or metastatic             | Ave 10mg/kg q2w                   | 249 | 62           | 164 (65.9) | 24.1     | NA       | NA        | NA        | NA       |
|                |                           |             |     |                |        |    |                                    | Chemo                             | 250 | 61           | 167 (66.8) | 24       | NA       | NA        | NA        | NA       |
| Kato,2019      | ATTRACTI ON-3             | NCT02569242 | III | OSCC           | MN     | 2  | Unresectable advanced or recurrent | Niv 240mg q2w                     | 210 | 64 (57-69)   | 179 (85)   | min17 .6 | 98 (47%) | 153 (73%) | 159 (76%) | 21 (10%) |
|                |                           |             |     |                |        |    |                                    | Chemo                             | 209 | 67 (57-72)   | 185 (89)   | min17 .6 | 92 (44%) | 142 (68%) | 147 (70%) | 30 (14%) |
| Shitara,2018   | KEYNOTE-061               | NCT02370498 | III | G/GEJ          | MN     | ≥2 | Advanced                           | Pem 200mg q3w                     | 296 | 62.5 (54-70) | 202 (68)   | 7.9      | NA       | NA        | NA        | NA       |
|                |                           |             |     |                |        |    |                                    | Paclitaxel                        | 296 | 60.0 (53-68) | 208 (70)   | 7.9      | NA       | NA        | NA        | NA       |
| 2Choueiri,2021 | KEYNOTE-564               | NCT03142334 | III | RCC            | MN     | NA | High risk for recurrence           | Pem 200mg q3w                     | 488 | 60.0 (27-81) | 347 (70.0) | 24.1     | NA       | NA        | NA        | NA       |
|                |                           |             |     |                |        |    |                                    | Placebo                           | 496 | 60.0         | 359        | 24.1     | NA       | NA        | NA        | NA       |

|                |                 |             |     |                  |       |    |                  |                                          |     |                  |            |      |            |         |            |           |
|----------------|-----------------|-------------|-----|------------------|-------|----|------------------|------------------------------------------|-----|------------------|------------|------|------------|---------|------------|-----------|
|                |                 |             |     |                  |       |    |                  |                                          |     | (25-84)          | (72.1)     |      |            |         |            |           |
| Mateos,2019    | KEYNOTE-183     | NCT02576977 | III | Multiple Myeloma | MN    | ≥2 | Active multiple  | Pem 200mg q3w+Pomalidomide+Dexamethasone | 125 | 65 (60-72)       | 77 (62)    | 8.1  | NA         | NA      | NA         | NA        |
|                |                 |             |     |                  |       |    |                  | Pomalidomide+Dexamethasone               | 124 | 67 (60-74)       | 78 (63)    | 8.1  | NA         | NA      | NA         | NA        |
| Gettinger,2021 | Lung-MAP S1400I | NCT02785952 | III | SCLC             | MN    | 1  | Stage IV         | Niv 3mg/kg q2w+Ipi 1mg/kg q6w            | 125 | 67.5 (41.8-83.4) | 83 (66)    | 29.5 | NA         | 41 (33) | 75 (60)    | 48 (38)   |
|                |                 |             |     |                  |       |    |                  | Niv 3mg/kg q2w                           | 127 | 68.1 (48.6-90.3) | 86 (68)    | 29.5 | NA         | 45 (35) | 72 (57)    | 54 (43)   |
| Motzer,2021    | KEYNOTE-581     | NCT02811861 | III | RCC              | MN    | 1  | Advanced         | Pem 200mg q3w+Lenvatinib                 | 355 | 64 (34-88)       | 255 (71.8) | 26.6 | 249 (70.1) | NA      | NA         | NA        |
|                |                 |             |     |                  |       |    |                  | Lenvatinib+Everolimus                    | 357 | 62 (32-86)       | 266 (74.5) | 26.6 | 245 (68.6) | NA      | NA         | NA        |
|                |                 |             |     |                  |       |    |                  | Sunitinib                                | 357 | 61 (29-82)       | 275 (77.0) | 26.6 | 239 (66.9) | NA      | NA         | NA        |
| Lu,2021        | RATIONAL E 304  | NCT03663205 | III | NSCLC            | china | 1  | Stage IIIB or IV | Tis 200mg q3w+Chemo                      | 223 | 60 (27-75)       | 168 (75.3) | 9.8  | NA         | NA      | 115 (51.6) | 32 (14.3) |

|                 |                           |                 |     |      |        |    |              |                                                  |     |                         |               |      |    |    |              |              |
|-----------------|---------------------------|-----------------|-----|------|--------|----|--------------|--------------------------------------------------|-----|-------------------------|---------------|------|----|----|--------------|--------------|
|                 |                           |                 |     |      |        |    |              | Chemo                                            | 111 | 61<br>(25-74)           | 79<br>(71.2)  | 9.8  | NA | NA | 53<br>(47.7) | 13<br>(11.7) |
| Monk,2021       | JAVELIN<br>OVARIAN<br>100 | NCT02718<br>417 | III | OC   | Global | 1  | Stage III-IV | Chemotherapy followed<br>by Ave 10mg/kg q2w      | 332 | 59.0<br>(52.0-67.<br>0) | 0             | 10.8 | NA | NA | NA           | NA           |
|                 |                           |                 |     |      |        |    |              | Ave 10mg/kg<br>q3w+Chemo followed<br>by avelumab | 331 | 60.0<br>(50.0-66.<br>0) | 0             | 10.8 | NA | NA | NA           | NA           |
|                 |                           |                 |     |      |        |    |              | Chemo                                            | 335 | 57.0<br>(49.0-66.<br>0) | 0             | 10.8 | NA | NA | NA           | NA           |
| NCT0248183<br>0 | CheckMate<br>331          | NCT02481<br>830 | III | SCLC | NA     | ≥2 | Relapsed     | Niv 240mg q2w                                    | 284 | 61.5                    | 173<br>(61.3) | 15.8 | NA | NA | NA           | NA           |
|                 |                           |                 |     |      |        |    |              | Chemo                                            | 285 | 61.6                    | 165<br>(62.1) | 15.8 | NA | NA | NA           | NA           |
| NCT0336186<br>5 | KEYNOTE-<br>672           | NCT03361<br>865 | III | UC   | NA     | NA | NA           | Pem 200mg q3w+TTD                                | 43  | 73.3                    | 32<br>(75)    | NA   | NA | NA | NA           | NA           |
|                 |                           |                 |     |      |        |    |              | Pem 200mg q3w                                    | 49  | 72.4                    | 38<br>(77.6)  | NA   | NA | NA | NA           | NA           |

|                 |                  |                 |     |       |    |    |          |                          |     |               |              |      |    |                 |    |    |
|-----------------|------------------|-----------------|-----|-------|----|----|----------|--------------------------|-----|---------------|--------------|------|----|-----------------|----|----|
| NCT0335847<br>2 | KEYNOTE-<br>669  | NCT03358<br>472 | III | HNSCC | NA | NA | NA       | Pem 200mg q3w+TTD        | 34  | 62.1          | 29<br>(85.7) | NA   | NA | NA              | NA | NA |
|                 |                  |                 |     |       |    |    |          | Pem 200mg q3w            | 19  | 63            | 16<br>(84.2) | NA   | NA | NA              | NA | NA |
|                 |                  |                 |     |       |    |    |          | Chemo                    | 34  | 62.7          | 28<br>(82.9) | NA   | NA | NA              | NA | NA |
| NCT0227973<br>2 | NA               | NCT02279<br>732 | III | NSCLC | NA | NA | NA       | Ipi 10mg/kg<br>q3w+Chemo | 98  | 60.9          | 87<br>(88.8) | NA   | NA | NA              | NA | NA |
|                 |                  |                 |     |       |    |    |          | Chemo                    | 106 | 59.8          | 93<br>(87.7) | NA   | NA | NA              | NA | NA |
| Chan,2021       | KEYNOTE-<br>122  | NCT02611<br>960 | III | NC    | NA | NA | NA       | Pem 200mg q3w            | 116 | NA            | NA           | NA   | NA | NA              | NA | NA |
|                 |                  |                 |     |       |    |    |          | Chemo                    | 112 | NA            | NA           | NA   | NA | NA              | NA | NA |
| Zhou,2020       | KEYNOTE-<br>033  | NCT02864<br>394 | III | NSCLC | NA | NA | NA       | Pem 200mg q3w            | 213 | NA            | NA           | NA   | NA | NA              | NA | NA |
|                 |                  |                 |     |       |    |    |          | Chemo                    | 198 | NA            | NA           | NA   | NA | NA              | NA | NA |
| NCT0257650<br>9 | CheckMate<br>459 | NCT02576<br>509 | III | HCC   | MN | 1  | Advanced | Niv 240mg q2w            | 371 | 65<br>(57-71) | 314<br>(85)  | 15.2 | NA | 45<br>(12%<br>) | NA | NA |
|                 |                  |                 |     |       |    |    |          | Sorafenib                | 372 | 65<br>(58-72) | 317<br>(85)  | 15.2 | NA | 40<br>(11%<br>) | NA | NA |

|                  |                 |             |     |                                |    |    |                        |                                |     |                  |           |      |    |           |           |           |
|------------------|-----------------|-------------|-----|--------------------------------|----|----|------------------------|--------------------------------|-----|------------------|-----------|------|----|-----------|-----------|-----------|
| NCT02576509      | IMbassador250   | NCT03016312 | III | mCRPC                          | NA | NA | Metastatic             | Ate 1200mg q3w+Enzalutamide    | 379 | 70.0 (51-91)     | 379 (100) | 15.2 | NA | NA        | NA        | NA        |
|                  |                 |             |     |                                |    |    |                        | Enzalutamide                   | 380 | 70.0 (40-92)     | 380 (100) | 15.2 | NA | NA        | NA        | NA        |
| Peters,2021      | CheckMate-032   | NCT02046733 | II  | SCLC                           | MN | ≥2 | Stage IA-IIIB          | Niv 1mg/kg+Ipi 3mg/kg q3w      | 78  | 61.1 (37.7-83.2) | 50 (64.1) | 22.4 | NA | NA        | 51 (65.4) | 27 (34.6) |
|                  |                 |             |     |                                |    |    |                        | Placebo                        | 75  | 61.9 (38.6-77.3) | 42 (56.0) | 22.4 | NA | NA        | 49 (65.3) | 25 (33.3) |
| Scherpereel,2019 | IFCT-1501 MAPS2 | NCT02716272 | II  | Malignant pleural mesothelioma | MN | ≥2 | Relapsed               | Niv 3mg/kg q2w                 | 63  | 72.3 (32.5-87.2) | 47 (75.0) | 20.1 | NA | NA        | NA        | 34 (54%)  |
|                  |                 |             |     |                                |    |    |                        | Niv 3mg/kg q2w+Ipi 1mg/kg q6w  | 61  | 71.2 (48.1-88.1) | 53 (85.0) | 20.1 | NA | NA        | NA        | 36 (58%)  |
| Voss,2022        | NA              | NCT02118337 | II  | RCC                            | MN | 2  | Advanced or Metastatic | MEDI0680 20mg/kg+Dur 750mg q2w | 42  | 64.0 (39-80)     | 33 (78.6) | 38.3 | NA | 15 (35.7) | NA        | NA        |
|                  |                 |             |     |                                |    |    |                        | Niv 240mg q2w                  | 21  | 58.0 (38-80)     | 15 (71.4) | 14.1 | NA | 5 (23.8)  | NA        | NA        |

|                |                |             |     |       |        |    |            |                              |     |                 |           |      |    |    |           |          |
|----------------|----------------|-------------|-----|-------|--------|----|------------|------------------------------|-----|-----------------|-----------|------|----|----|-----------|----------|
| Loibl,2019     | GeparNuevo     | NCT02685059 | II  | TNBC  | MN     | NA | Early      | Dur 750mg q2w                | 92  | 49.5(25.0-74.0) | NA        | NA   | NA | NA | NA        | NA       |
|                |                |             |     |       |        |    |            | placebo                      | 82  | 49.5(23.0-76.0) | NA        | NA   | NA | NA | NA        | NA       |
| McDermott,2018 | IMmotion150    | NCT01984242 | II  | RCC   | MN     | NA | Metastatic | Sunitinib 50mg qd            | 101 | 61(25-85)       | 79(78)    | 20.7 | NA | NA | NA        | NA       |
|                |                |             |     |       |        |    |            | Ate 1200mg q3w               | 103 | 62(32-88)       | 74(73)    | 20.7 | NA | NA | NA        | NA       |
|                |                |             |     |       |        |    |            | Ate 1200mg + Bev 15mg/kg q3w | 101 | 61(27-81)       | 77(75)    | 20.7 | NA | NA | NA        | NA       |
| Zhou,2023      | RATIONAL E-303 | NCT03358875 | III | NSCLC | Global | ≥2 | Advanced   | Tislelizumab 200 mg q3w      | 534 | 61.0(28-88)     | 416(77.8) | 16   | NA | NA | 373(69.7) |          |
|                |                |             |     |       |        |    |            | Docetaxel                    | 258 | 61.0(32-81)     | 206(76.3) | 10.7 | NA | NA | 188(69.6) |          |
| Johnson,2023   | POSEIDON       | NCT03164616 | III | NSCLC | Global | 1  | Metastatic | Tre 75mg+Dur 1500mg+Chemo    | 330 | 63.0(27-87)     | 269(79.6) | 10.3 | NA | NA | 195(57.7) | 84(24.9) |
|                |                |             |     |       |        |    |            | Dur 1500mg+Chemo             | 334 | 64.5(32-87)     | 253(74.9) | 10.3 | NA | NA | 190(56.2) | 64(18.9) |
|                |                |             |     |       |        |    |            | Chemo                        | 333 | 64.0            | 248       | 10.3 | NA | NA | 191       | 66       |

|             |                  |                 |     |       |        |    |                        |                                             |     |                 |               |      |    |    |               |               |
|-------------|------------------|-----------------|-----|-------|--------|----|------------------------|---------------------------------------------|-----|-----------------|---------------|------|----|----|---------------|---------------|
|             |                  |                 |     |       |        |    |                        |                                             |     | (32-84)         | (73.6)        |      |    |    | (56.7)        | (19.6)        |
| Forde,2022  | CheckMate<br>816 | NCT02998<br>528 | III | NSCLC | MN     | ≥2 | Stage IB-III A         | Niv 360mg<br>q3w+Chemo                      | 176 | 64<br>(41-82)   | 128<br>(71.5) | 29.5 | NA | NA | 160<br>(89.4) |               |
|             |                  |                 |     |       |        |    |                        | Chemo                                       | 176 | 65<br>(34-84)   | 127<br>(70.9) | 29.5 | NA | NA | 158<br>(88.3) |               |
| Jr,2023     | NEPTUNE          | NCT02542<br>293 | III | NSCLC | MN     | 1  | Metastatic             | Dur 20<br>mg/kg+Tremelimumab<br>1 mg/kg q4w | 410 | 63.0<br>(27-83) | 297<br>(72.4) | 32.9 | NA | NA | 200<br>(48.8) | 138<br>(33.7) |
|             |                  |                 |     |       |        |    |                        | Chemo                                       | 339 | 65.0<br>(30-90) | 305<br>(73.8) | 32.9 | NA | NA | 222<br>(53.8) | 117<br>(28.3) |
| Herbst,2022 | COAST            | NCT03822<br>351 | II  | NSCLC | Global | NA | Unresectable,Stage III | Dur 1500mg q4w                              | 66  | 66.0<br>(46-81) | 45( 6<br>7.2) | 11.5 | NA |    | 62<br>(92.5)  | 63 (94.0)     |
|             |                  |                 |     |       |        |    |                        | Dur 1500mg<br>q4w+Oleclumab                 | 59  | 65.0<br>(37-83) | 42( 7<br>0.0) | 11.5 | NA |    | 54<br>(90.0)  | 54 (90.0)     |
|             |                  |                 |     |       |        |    |                        | Dur 1500mg<br>q4w+Monalizumab               | 61  | 65.0<br>(44-87) | 44( 6<br>7.7) | 11.5 | NA |    | 57<br>(91.9)  | 59 (95.2)     |

|                |             |                |     |                                    |    |    |                        |                         |     |                     |              |      |                   |                   |                  |    |
|----------------|-------------|----------------|-----|------------------------------------|----|----|------------------------|-------------------------|-----|---------------------|--------------|------|-------------------|-------------------|------------------|----|
| Diaz,2022      | KEYNOTE-177 | NCT02563002    | III | colorectal cancer                  | MN | 1  | Metastatic             | Pem 200 mg q3w          | 149 | 61.9<br>(14.9)      | 71(46<br>.4) | 44.5 | NA                | NA                | NA               | NA |
|                |             |                |     |                                    |    |    |                        | Chemo                   | 142 | 60.6<br>(14.8)      | 82(53<br>.2) | 44.5 | NA                | NA                | NA               | NA |
| Xu,2022        | ORIENT-2    | NCT03116152    | II  | esophageal squamous cell carcinoma | MN | 2  | Advanced or Metastatic | Sin 200mg q3w           | 94  | 60<br>(54-64)       | 88<br>(92.6) | 7.2  | 37<br>(38.9<br>%) | 50<br>(52.6<br>%) | NA               | NA |
|                |             |                |     |                                    |    |    |                        | Chemo                   | 87  | 60<br>(54-64)       | 84<br>(88.4) | 6.2  | 46<br>(48.4<br>%) | 58<br>(61.1<br>%) | NA               | NA |
| Taniguchi,2022 | TORG1630    | JRCTs031180331 | III | NSCLC                              | MN | ≥2 | Advanced or Recurrent  | Niv 240mg q2w           | 64  | 69.5<br>(35-84)     | 44<br>(68.8) | 12.5 | NA                | NA                | 49<br>(76.6<br>) |    |
|                |             |                |     |                                    |    |    |                        | Niv 240mg q2w+Docetaxel | 64  | 69<br>(45-83)       | 45<br>(70.3) | 18.9 | NA                | NA                | 52<br>(81.3<br>) |    |
| Rossevoid,2022 | ALICE       | NCT03164993    | II  | TNBC                               | MN | 1  | Metastatic             | Chemo                   | 28  | 52.5<br>(28.0-74.0) | 0 (0)        | 32.2 | 10<br>(35.7<br>%) | NA                | NA               | NA |
|                |             |                |     |                                    |    |    |                        | Ate 840 mg q2w+Chemo    | 40  | 58.5<br>(31.0-77.0) | 1<br>(2.5)   | 32.2 | 18<br>(45.0<br>%) | NA                | NA               | NA |



|             |            |                 |     |                                                 |            |    |              |                                       |     |                 |               |      |    |                  |                   |                  |
|-------------|------------|-----------------|-----|-------------------------------------------------|------------|----|--------------|---------------------------------------|-----|-----------------|---------------|------|----|------------------|-------------------|------------------|
| Park,2022   | NA         | NCT02520<br>453 | II  | esophagea<br>l<br>squamous<br>cell<br>carcinoma | Kor<br>ea  | ≥2 | Stage II-III | Dur 20 mg/kg q4w                      | 45  | 64<br>(39-76)   | 43<br>(96)    | 38.7 | NA | NA               | 15<br>(33)        | 23<br>(51)       |
|             |            |                 |     |                                                 |            |    |              | Placebo                               | 41  | 66<br>(42-83)   | 37<br>(90)    | 38.7 | NA | NA               | 19<br>(46)        | 18<br>(44)       |
| Cheng,2022  | IMbrave150 | NCT03434<br>379 | III | HCC                                             | Glo<br>bal | 1  | Unresectable | Ate<br>1200mg+Bevacizumab<br>q3w      | 329 | NA              | 277(8<br>2.4) | 15.6 | NA | NA               | NA                | NA               |
|             |            |                 |     |                                                 |            |    |              | Sorafenib                             | 156 | NA              | 137(8<br>3.0) | 15.6 | NA | NA               | NA                | NA               |
| Leighl,2022 | CCTG BR34  | NCT03793<br>179 | II  | NSCLC                                           | MN         | 1  | Metastatic   | Dur 1500 mg + Tre<br>75mg + Chemo q3w | 148 | 65.0<br>(27-79) | 81<br>(53.6)  | 16.6 | NA | 76<br>(50.3<br>) | 102<br>(67.6<br>) | 37<br>(24.5<br>) |
|             |            |                 |     |                                                 |            |    |              | Dur 1500 mg + Tre<br>75mg q3w         | 149 | 63.0<br>(38-87) | 81<br>(54.0)  | 16.6 | NA | 77<br>(51.3<br>) | 101<br>(67.4<br>) | 35<br>(23.3<br>) |
| Jung,2022   | NA         | NA              | II  | NSCLC                                           | Kor<br>ea  | 2  | Advanced     | Pem 200mg<br>q3w+Chemo                | 47  | 63<br>(36-82)   | 37<br>(78.7)  | 10.5 | NA | NA               | 36<br>(76.6<br>%) | 5<br>(10.6<br>%) |
|             |            |                 |     |                                                 |            |    |              | Placebo+Chemo                         | 51  | 64<br>(38-79)   | 43<br>(84.3)  | 10.5 | NA | NA               | 39<br>(76.5<br>%) | 5<br>(9.8<br>%)  |

|             |                |             |     |                                    |        |   |                 |                                 |     |                |               |      |    |    |               |               |
|-------------|----------------|-------------|-----|------------------------------------|--------|---|-----------------|---------------------------------|-----|----------------|---------------|------|----|----|---------------|---------------|
| 2Cheng,2022 | ASTRUM-005     | NCT04063163 | III | SCLC                               | MN     | 1 | Extensive-Stage | Serplulimab 4.5mg/kg q3w        | 389 | 63<br>(28-76)  | 317<br>(81.5) | 12.3 | NA | NA | 102<br>(26.2) | 206<br>(53.0) |
|             |                |             |     |                                    |        |   |                 | Placebo                         | 196 | 62<br>(31-83)  | 164<br>(83.7) | 12.3 | NA | NA | 48<br>(24.5)  | 113<br>(57.7) |
| Kato,2023   | CheckMate 648  | NCT03143153 | III | esophageal squamous cell carcinoma | Global | 1 | Advanced        | Niv 3 mg/kg q2w+Ipi 1 mg/kg q6w | 130 | 66<br>(34-81)  | 111<br>(84.7) | NA   | NA | NA | 120 (91.6)    |               |
|             |                |             |     |                                    |        |   |                 | Niv 240 mg q2w+Chemo            | 121 | 68<br>(44-86)  | 99<br>(78.6)  | NA   | NA | NA | 109 (86.5)    |               |
|             |                |             |     |                                    |        |   |                 | Chemo                           | 135 | 67<br>(36-78)  | 121<br>(88.3) | NA   | NA | NA | 120<br>(87.6) |               |
| NCT02879318 | PA7            | NCT02879318 | II  | Pancreatic Adenocarcinoma          | MN     | 1 | Metastatic      | Dur 1500mg+Tre 75 mg+Chemo      | 119 | 64(29-81)      | 67(56.3)      | 35   | NA | NA | NA            | NA            |
|             |                |             |     |                                    |        |   |                 | Chemo                           | 58  | 65(42-84)      | 26(42.6)      | 35   | NA | NA | NA            | NA            |
| NCT03430063 | R2810-ONC-1763 | NCT03430063 | II  | NSCLC                              | MN     | 2 | Advanced        | Cem 350 mg Q3W                  | 8   | 62.4<br>(7.91) | 6 (75.0)      | 5.1  | NA | NA | NA            | NA            |

|                 |           |                 |    |                            |                          |    |                                      |                                             |     |                 |              |       |    |    |    |    |
|-----------------|-----------|-----------------|----|----------------------------|--------------------------|----|--------------------------------------|---------------------------------------------|-----|-----------------|--------------|-------|----|----|----|----|
|                 |           |                 |    |                            |                          |    |                                      | Cem 350 mg q3w + Ipi<br>50 mg q6w           | 11  | 68.5<br>(8.72)  | 7(63.<br>6)  | NA    | NA | NA | NA | NA |
|                 |           |                 |    |                            |                          |    |                                      | Cem 1050 mg q3w                             | 8   | 68.1<br>(12.08) | 7(87.<br>5)  | 8.4   | NA | NA | NA | NA |
| NCT0310156<br>6 | CA209-9FC | NCT03101<br>566 | II | Biliary<br>Tract<br>Cancer | MN                       | NA | Advanced<br>Unresectable             | Niv 360 mg<br>q3w+Gemcitabine+Cis<br>platin | 35  | 59(20-80)       | 20(54<br>.1) | NA    | NA | NA | NA | NA |
|                 |           |                 |    |                            |                          |    |                                      | Niv 240mg q2w + Ipi 1<br>mg/kg q6w          | 33  | 61(34-79)       | 18(47<br>.4) | NA    | NA | NA | NA | NA |
| NCT0316761<br>9 | DORA      | NCT03167<br>619 | II | TNBC                       | Unit<br>ed<br>Stat<br>es | NA | Advanced<br>Unresectable             | Olaparib                                    | 23  | 52.4<br>(11.9)  | 0(0)         | 21.68 | NA | NA | NA | NA |
|                 |           |                 |    |                            |                          |    |                                      | Olaparib+Dur q4w                            | 22  | 49.5<br>(11.7)  | 0(0)         | 18.27 | NA | NA | NA | NA |
| NCT0190399<br>3 | POPLAR    | NCT01903<br>993 | II | NSCLC                      | MN                       | NA | Locally<br>Advanced or<br>Metastatic | Docetaxel                                   | 143 | 61.8<br>(9.4)   | 76(53<br>.1) | 9.7   | NA | NA | NA | NA |
|                 |           |                 |    |                            |                          |    |                                      | Ate 1200mg q3w                              | 144 | 61.5<br>(9.2)   | 93(64<br>.6) | 12.6  | NA | NA | NA | NA |

|                 |                  |                 |    |       |    |    |                            |                                   |     |           |               |    |    |    |              |              |
|-----------------|------------------|-----------------|----|-------|----|----|----------------------------|-----------------------------------|-----|-----------|---------------|----|----|----|--------------|--------------|
| NCT0231904<br>4 | CONDOR           | NCT02319<br>044 | II | HNSCC | MN | ≥2 | Recurrent or<br>Metastatic | Dur 20 mg/kg+Tre 1<br>mg/kg q4w   | 133 | 62(26-81) | 113(8<br>5.0) | 12 | NA | NA | 89(6<br>6.9) | 24(1<br>6.5) |
|                 |                  |                 |    |       |    |    |                            | Dur 10 mg/kg q2w                  | 67  | 62(23-82) | 54(80<br>.6)  | 12 | NA | NA | 51(7<br>6.1) | 7(10.<br>4)  |
|                 |                  |                 |    |       |    |    |                            | Tre 10 mg/kg q4w                  | 67  | 61(42-77) | 53(79<br>.1)  | 12 | NA | NA | 46(6<br>8.7) | 6(9.0<br>)   |
| NCT0259161<br>5 | NA               | NCT02591<br>615 | II | NSCLC | MN | 1  | Stage IV                   | Pem 200mg q3w                     | 67  | NA        | NA            | 24 | NA | NA | NA           | NA           |
|                 |                  |                 |    |       |    |    |                            | Carboplatin +<br>Pemetrexed       | 47  | NA        | NA            | 24 | NA | NA | NA           | NA           |
|                 |                  |                 |    |       |    |    |                            | Carboplatin + Paclitaxel          | 13  | NA        | NA            | 24 | NA | NA | NA           | NA           |
| NCT0298595<br>7 | CheckMate<br>650 | NCT02985<br>957 | II | mCRPC | MN | NA | Metastatic                 | Niv 3 mg/kg + Ipi 1<br>mg/kg q4w  | 73  | NA        | 73(10<br>0)   | 61 | NA | NA | NA           | NA           |
|                 |                  |                 |    |       |    |    |                            | Niv 1 mg/kg + Ipil 3<br>mg/kg q6w | 73  | NA        | 73(10<br>0)   | 61 | NA | NA | NA           | NA           |
|                 |                  |                 |    |       |    |    |                            | Ipi 3 mg/kg q3w                   | 38  | NA        | 38(10<br>0)   | 61 | NA | NA | NA           | NA           |
|                 |                  |                 |    |       |    |    |                            | Cabazitaxel+Prednison<br>e        | 72  | NA        | 72(10<br>0)   | 61 | NA | NA | NA           | NA           |

|             |                     |             |     |          |    |    |                                |                                            |     |              |           |      |    |    |    |    |
|-------------|---------------------|-------------|-----|----------|----|----|--------------------------------|--------------------------------------------|-----|--------------|-----------|------|----|----|----|----|
| NCT02551159 | KESTREL             | NCT02551159 | III | HNSCC    | MN | 1  | Recurrent/Metastatic           | Dur 1500mg + Tre 75mg q4w                  | 408 | 60.5 (9.56)  | 340(82.3) | 48   | NA | NA | NA | NA |
|             |                     |             |     |          |    |    |                                | Dur 1500mg q4w                             | 202 | 60.2 (10.41) | 175(85.8) | 48   | NA | NA | NA | NA |
|             |                     |             |     |          |    |    |                                | Soc                                        | 196 | 60.9 (9.45)  | 174(84.5) | 48   | NA | NA | NA | NA |
| NCT02603432 | JAVELIN Bladder 100 | NCT02603432 | III | UC       | MN | 1  | Locally Advanced Or Metastatic | Ave 10mg/kg q2w+Best Supportive Care (BSC) | 344 | 67.20 (9.52) | 266(76.0) | 41   | NA | NA | NA | NA |
|             |                     |             |     |          |    |    |                                | BSC                                        | 345 | 67.7 (9.20)  | 275(78.6) | 41   | NA | NA | NA | NA |
| NCT03553836 | KEYNOTE-716         | NCT03553836 | III | Melanoma | MN | NA | Resected High-risk Stage II    | Pem 2 mg/kg q3w                            | 483 | 59.0 (12.6)  | 300(61.6) | 32.7 | NA | NA | NA | NA |
|             |                     |             |     |          |    |    |                                | Placebo                                    | 486 | 59.6 (13.3)  | 289(59.1) | 32.7 | NA | NA | NA | NA |
| NCT03033576 | S1616               | NCT03033576 | II  | Melanoma | MN | NA | Advanced                       | Niv 1 mg/kg + Ipi 3mg/kg q3w               | 68  | 64(34-90)    | 15(65.2)  | 14.5 | NA | NA | NA | NA |
|             |                     |             |     |          |    |    |                                | Ipi 3mg/kg q3w                             | 23  | 69(40-91)    | 46(66.7)  | 22.1 | NA | NA | NA | NA |

|                 |                 |                 |     |                             |    |    |                                      |                                              |     |                 |               |    |    |    |    |    |
|-----------------|-----------------|-----------------|-----|-----------------------------|----|----|--------------------------------------|----------------------------------------------|-----|-----------------|---------------|----|----|----|----|----|
| NCT0387523<br>5 | TOPAZ-1         | NCT03875<br>235 | III | Biliary<br>Tract<br>Cancers | MN | 1  | Advanced                             | Dur 1500 mg<br>q3w+Gemcitabine+Cis<br>platin | 341 | 62.2<br>(10.49) | 169(4<br>9.6) | 27 | NA | NA | NA | NA |
|                 |                 |                 |     |                             |    |    |                                      | Placebo+Gemcitabine+<br>Cisplatin            | 344 | 62.6<br>(10.66) | 176(5<br>1.2) | 27 | NA | NA | NA | NA |
| NCT0345984<br>6 | BAYOU           | NCT03459<br>846 | II  | UC                          | MN | 1  | Unresectable<br>Stage IV             | Dur 1500mg q4w+<br>Olaparib                  | 78  | 73.4<br>(10.8)  | 56(71<br>.8)  | 31 | NA | NA | NA | NA |
|                 |                 |                 |     |                             |    |    |                                      | Dur 1500mg<br>q4w+Placebo                    | 76  | 70.2<br>(10.26) | 55(72<br>.4)  | 31 | NA | NA | NA | NA |
| NCT0351744<br>9 | KEYNOTE-<br>775 | NCT03517<br>449 | III | Endometri<br>al Cancer      | MN | NA | Advanced                             | Lenvatinib + Pem<br>200mg q3w                | 406 | 63.2<br>(9.1)   | 0(0)          | 29 | NA | NA | NA | NA |
|                 |                 |                 |     |                             |    |    |                                      | Doxorubicin or<br>Paclitaxel                 | 388 | 63.8<br>(9.2)   | 0(0)          | 29 | NA | NA | NA | NA |
| NCT0356371<br>6 | CITYSCAP<br>E   | NCT03563<br>716 | II  | NSCLC                       | MN | NA | Locally<br>Advanced Or<br>Metastatic | Placebo+Ate 1200mg<br>q3w                    | 68  | 67.0<br>(9.9)   | 48(70<br>.6)  | 11 | NA | NA | NA | NA |
|                 |                 |                 |     |                             |    |    |                                      | Tiragolumab+Ate<br>1200mg q3w                | 67  | 65.8<br>(10.4)  | 39(58<br>.2)  | 11 | NA | NA | NA | NA |
| NCT0287092<br>0 | CO26            | NCT02870<br>920 | II  | Colorectal<br>Cancer        | MN | NA | Advanced                             | BSC                                          | 61  | NA              | 47(77<br>.0)  | 24 | NA | NA | NA | NA |

|                   |                     |                 |            |                                               |    |    |                                |                                               |                                |                |               |              |    |    |    |    |    |
|-------------------|---------------------|-----------------|------------|-----------------------------------------------|----|----|--------------------------------|-----------------------------------------------|--------------------------------|----------------|---------------|--------------|----|----|----|----|----|
|                   |                     |                 |            |                                               |    |    |                                |                                               | Dur 1500mg+Tre<br>75mg+BSC q4w | 118            | NA            | 74(62<br>.2) | 24 | NA | NA | NA | NA |
| NCT0184337<br>4   | NA                  | NCT01843<br>374 | II         | Malignant<br>Mesotheli<br>oma                 | MN | ≥2 | Unresectable                   | Tre 10mg/kg q4w                               | 380                            | 65.2<br>(9.24) | 283(7<br>4.1) | 36           | NA | NA | NA | NA |    |
|                   |                     |                 |            |                                               |    |    |                                | Placebo                                       | 189                            | 66.3<br>(8.8)  | 151(7<br>9.9) | 36           | NA | NA | NA | NA |    |
| NCT0190565<br>7   | KEYNOTE-<br>010     | NCT01905<br>657 | II/I<br>II | NSCLC                                         | MN | ≥2 | NA                             | Pem 2 mg/kg q3w                               | 339                            | 62.1<br>(9.6)  | 213(6<br>1.7) | 24           | NA | NA | NA | NA |    |
|                   |                     |                 |            |                                               |    |    |                                | Pem 10 mg/kg q3w                              | 343                            | 62.3<br>(9.7)  | 213(6<br>1.6) | 24           | NA | NA | NA | NA |    |
|                   |                     |                 |            |                                               |    |    |                                | Docetaxel                                     | 309                            | 61.6<br>(9.8)  | 209(6<br>0.9) | 24           | NA | NA | NA | NA |    |
| Klein,2021        | CA 209-538          | NCT04969<br>887 | II         | rare<br>gynecolog<br>ical<br>malignanc<br>ies | MN | ≥2 | NA                             | Niv 3mg/kg q2w+Ipi 3<br>mg/kg and 1 mg/kg q4w | 43                             | 59<br>(20-76)  | 0(0)          | 16.8         | NA | NA | NA | NA |    |
| Mamdani,202<br>1  | BTCRC-ES<br>O14-012 | NCT02639<br>065 | II         | GEC                                           | MN | ≥2 | Locally<br>advanced            | Dur 1500mg q4w                                | 37                             | 61<br>(43-73)  | 36(97<br>.3)  | 17.7         | NA | NA | NA | NA |    |
| O'Malley,202<br>1 | C-700-01            | NCT03104<br>699 | II         | cervical<br>cancer                            | MN | NA | Recurrent and/or<br>metastatic | Balstilimab 3 mg/kg<br>q2w                    | 161                            | 53<br>(25-81)  | 0(0)          | 19.2         | NA | NA | NA | NA |    |

|                   |              |             |     |              |               |    |                            |                               |     |                 |               |       |    |       |            |      |
|-------------------|--------------|-------------|-----|--------------|---------------|----|----------------------------|-------------------------------|-----|-----------------|---------------|-------|----|-------|------------|------|
| Hughes,2021       | KEYNOTE-629  | NCT03284424 | II  | CSCC         | MN            | NA | Recurrent/metastatic       | Pem 200mg q3w                 | 159 | 74.0<br>(62-82) | 119<br>(74.8) | 24    | NA | NA    | NA         | NA   |
| Edenfield,2021    | ESR-15-11633 | NCT02938793 | II  | Rare Cancers | United States | ≥2 | NA                         | Dur 1500 mg q4w+Tre 75mg q4w  | 50  | 62(26-78)       | 22(44.0)      | NA    | NA | NA    | NA         | NA   |
| Bi,2021           | CA209-324    | NCT02648997 | II  | Meningioma   | United States | ≥2 | Recurrent                  | Niv 240mg q2w                 | 25  | 60<br>(25-88)   | 9(36)         | 21.47 | NA | NA    | NA         | NA   |
| Ardizzoni,2021    | MO39171      | NCT03285763 | III | NSCLC        | Global        | ≥2 | Advanced                   | Ate 1200mg q3w                | 615 | 64.0<br>(24-88) | 370<br>(60.2) | 12.6  | NA | NA    | 488 (79.3) |      |
| Rodriguez,2020    | NA           | NCT02538510 | II  | HNSCC        | United States | ≥1 | Recurrent Metastatic       | Pem 200mg q3w                 | 50  | 64<br>(44-78)   | 39(78)        | 12.6  | NA | NA    | 18(36)     | 1(4) |
| Nomura,2020       | NA           | NA          | II  | Melanoma     | MN            | 1  | Unresectable or metastatic | Niv 2mg/kg q3w                | 20  | 66<br>(28-84)   | 13(65)        | 18    | NA | NA    | NA         | NA   |
| Morgensztern,2020 | NA           | NCT02250326 | II  | NSCLC        | MN            | 1  | Advanced                   | Dur 1125mg q3w+nab-paclitaxel | 78  | 63.0<br>(29-84) | 54<br>(68.4)  | 12.9  | NA | NA    | NA         | NA   |
| Mei,2020          | NA           | NCT03346642 | II  | Lymphoma     | China         | 1  | Relapsed/refractory        | Cam 200mg q3w+Chemo           | 27  | 55.6(37.3-72.4) | 5(18.5)       | 24.8  | NA | 6(22) | NA         | NA   |



|               |                 |                  |    |                                |               |    |                        |                                    |    |                  |           |      |           |           |    |    |
|---------------|-----------------|------------------|----|--------------------------------|---------------|----|------------------------|------------------------------------|----|------------------|-----------|------|-----------|-----------|----|----|
| Lan,2020      | NA              | NCT03816553      | II | Cervical Cancer                | MN            | ≥2 | Advanced               | Cam 200mg q2w+apatinib 250mg qd    | 45 | 51 (33-67)       | 0(0)      | 11.3 | 20 (44.4) | 40 (88.9) | NA | NA |
| Dudek,2020    | BTCRC-GU 14-003 | NCT02348008      | II | RCC                            | MN            |    | Metastatic             | Pem 200mg q3w+bevacizumab 15 mg/kg | 13 | 61(42-84)        | 33 (68.8) | 28.3 | NA        | NA        | NA | NA |
| Vinayak,2019  | TOPACIO         | NCT02657889      | II | TNBC                           | MN            | 1  | Advanced or Metastatic | Pem 200mg q3w+ niraparib           | 55 | 54(32-90)        | 0(0)      | 14.8 | NA        | NA        | NA | NA |
| Okada,2019    | MERIT           | JapicCTI-1 63247 | II | Malignant Pleural Mesothelioma | MN            |    | Advanced or Metastatic | Niv 240mg q2w                      | 34 | 68.0 (43-78)     | 29 (85)   | 16.8 | NA        | NA        | NA | NA |
| Habra,2019    | NA              | NCT02721732      | II | ACC                            | United States | ≥2 | Advanced               | Pem 200mg q3w                      | 16 | 48 (31-78)       | 8 (50)    | 5    | NA        | NA        | NA | NA |
| Fujimoto,2019 | NA              | NA               | II | NSCLC                          | MN            | ≥2 | Advanced               | Niv                                | 18 | 71.5 (68.5-76.3) | 17 (94)   | 14.2 | NA        | NA        | NA | NA |
| Kim,2020      | MCC-18684       | NCT02829918      | II | BTC                            | MN            | 2  | Advanced Refractory    | Niv 240mg q2w                      | 54 | 65 (28-86)       | 27 (50)   | 12.4 | NA        | NA        | NA | NA |

|                  |             |             |    |                |    |    |                                 |                     |     |            |            |      |           |           |         |         |
|------------------|-------------|-------------|----|----------------|----|----|---------------------------------|---------------------|-----|------------|------------|------|-----------|-----------|---------|---------|
| Rothschild,2021  | SAKK 16/14  | NCT02572843 | II | NSCLC          | MN | ≥2 | Stage IIIA                      | Dur 750mg q2w+Chemo | 67  | 61 (41-74) | 35 (52)    | 28.6 | NA        | NA        | 36 (54) | 28 (42) |
| McDermott,2021   | KEYNOTE-427 | NCT02853344 | II | RCC            | MN | 1  | Advanced                        | Pem 200mg q3w       | 165 | 62 (22-86) | 109 (66.1) | 31.5 | 72 (43.6) | 19 (11.5) | NA      | NA      |
| Balar,2021       | KEYNOTE-057 | NCT02625961 | II | Bladder cancer | MN | 1  | BCG-unresponsive                | Pem 200mg q3w       | 101 | 73 (63-79) | 85 (84)    | 36.4 | NA        | NA        | NA      | NA      |
| Antonarakis,2020 | KEYNOTE-199 | NCT02787005 | II | mCRPC          | MN | ≥2 | Treatment-Refractory Metastatic | Pem 200mg q3w       | 258 | 68 (48-85) | 258(100)   | 9.5  | NA        | NA        | NA      | NA      |
| Bauml,2017       | KEYNOTE-055 | NCT02255097 | II | HNSCC          | MN | ≥2 | Refractory                      | Pem 200mg q3w       | 171 | 61 (33-90) | 138 (81)   | 7    | NA        | 153 (89)  | 99 (58) | 54 (32) |
| NCT02927301      | ML39236     | NCT02927301 | II | NSCLC          | MN | NA | Resectable                      | Ate 1200mg q3w      | 181 | 65.1(9.23) | 88(48.6)   | 42   | NA        | NA        | NA      | NA      |

Abbreviations:MN,multinational;SCLC, small cell lung cancer; RCC, renal cell carcinoma; HNSCC, Head and Neck Squamous Cell Carcinoma; NSCLC, non-small cell lung cancer; UC, urothelial carcinoma; HCC, hepatocellular carcinoma; G/GEC, gastric or gastroesophageal junction cancer; OC, ovarian cancer; TNBC, triple-negative breast cancer; mCRPC, metastatic castration-resistant prostate cancer; OSCC,oesophageal squamous cell carcinoma; CRC, Colorectal Cancer; NC, Nasopharyngeal Carcinoma; CSCC, cutaneous squamous cell carcinoma; ACC, adrenocortical carcinoma; BTC,biliary tract cancer; Niv, Nivolumab; Ipi, Ipilimumab; TTD, Targeted therapy drug; Chemo, Chemotherapy; Pem, Pembrolizumab; Ate, Atezolizumab; Ave, Avelumab; Dur, Durvalumab; Tre, Tremelimumab; Cam,Camrelizumab; Cem,Cemiplimab; Sin,Sintilimab;Tis,Tislelizumab.Soc,standard of care.

**Table S3. Results of individual studies**

| Study         | All-grade PAEs | Grade 3-4 PAEs | Grade 5 PAEs | Treatment       |
|---------------|----------------|----------------|--------------|-----------------|
| Ascierto,2020 | 2              | 1              | 0            | Niv 3mg/kg q2w  |
|               | 1              | 0              | 0            | Ipi 10mg/kg q3w |
| Bellmunt,2021 | 0              | 0              | 0            | Placebo         |

|                |    |    |   |                                           |
|----------------|----|----|---|-------------------------------------------|
|                | 6  | 1  | 1 | Ate 1200mg q3w                            |
| Emens,2021     | 0  | 0  | 0 | Chemo                                     |
|                | 1  | 1  | 0 | Ate 840mg q2w+Chemo                       |
| Chen,2020      | 0  | 0  | 0 | Placebo                                   |
|                | 8  | 2  | 0 | Niv 3mg/kg q2w                            |
| Gutzmer,2020   | 23 | 2  | 0 | Ate 840mg q2w+ Cobimetinib + Vemurafenib  |
|                | 13 | 0  | 0 | placebo+ Cobimetinib + Vemurafenib        |
| Herbst,2020    | 8  | 8  | 0 | Ate 1200mg q3w                            |
|                | 1  | 1  | 0 | Chemo                                     |
| Hodi,2018      | 2  | 2  | 0 | Niv 3mg/kg q2w                            |
|                | 8  | 8  | 0 | Niv 1mg/kg q3w+Ipi3 mg/kg q3w             |
|                | 2  | 2  | 0 | Ipi 3mg/kg q3w                            |
| Janjigian,2021 | 3  | 0  | 3 | Niv 360mg q3w or 240mg q2w+Chemo          |
|                | 1  | 1  | 0 | Chemo                                     |
| Jotte,2020     | 10 | 3  | 0 | Ate 1200mg q3w+Carboplatin+Paclitaxel     |
|                | 11 | 8  | 1 | Ate 1200mg q3w+Carboplatin+Nab-Paclitaxel |
|                | 2  | 2  | 0 | Carboplatin+Nab-Paclitaxel                |
| Kuruvilla,2021 | 15 | 8  | 0 | Pem 200mg q3w                             |
|                | 2  | 2  | 0 | Brentuximab Vedotin                       |
| 1Wu,2019       | 22 | 19 | 3 | Niv 3mg/kg q2w                            |
|                | 0  | 0  | 0 | Docetaxel                                 |
| 1Motzer,2020   | 5  | 2  | 0 | Niv 3mg/kg q2w                            |
|                | 14 | 3  | 0 | Everolimus                                |
| Fradet,2019    | 8  | 7  | 1 | Pem 200mg q3w                             |
|                | 0  | 0  | 0 | Chemo                                     |

|              |    |   |   |                                         |
|--------------|----|---|---|-----------------------------------------|
| Antonia,2017 | 8  | 2 | 0 | Dur 10mg/kg q2w                         |
|              | 43 | 6 | 0 | Placebo                                 |
| 1Powles,2020 | 6  | 2 | 0 | Dur 1500mg q4w                          |
|              | 12 | 2 | 1 | Dur 1500mg q4w+Tre 75mg q4w             |
|              | 1  | 0 | 0 | Chemo                                   |
| 2Powles,2020 | 14 | 0 | 1 | Pem 200mg q3w+Axitinib                  |
|              | 1  | 0 | 0 | Sunitinib                               |
| Powles,2021  | 4  | 4 | 0 | Pem 200mg q3w                           |
|              | 0  | 0 | 0 | Pem 200mg q3w+Chemo                     |
|              | 0  | 0 | 0 | Chemo                                   |
| Reardon,2020 | 4  | 2 | 0 | Niv 3mg/kg q2w                          |
|              | 0  | 0 | 0 | Bevacizumab                             |
| Rizvi,2020   | 6  | 5 | 1 | Dur 20mg/kg q4w                         |
|              | 15 | 3 | 7 | Dur 20mg/kg q4w+Tre 1mg/kg q4w          |
|              | 1  | 0 | 1 | Chemo                                   |
| Sezer,2021   | 12 | 1 | 1 | Cem 350mg q3w                           |
|              | 1  | 0 | 0 | Chemo                                   |
| Sun,2021     | 20 | 5 | 2 | Pem 200mg q3w                           |
|              | 1  | 0 | 1 | Chemo                                   |
| Winer,2021   | 6  | 1 | 2 | Pem 200mg q3w                           |
|              | 0  | 0 | 0 | Chemo                                   |
| Yang,2021    | 8  | 2 | 0 | Cam 200mg q3w+Gemcitabine and Cisplatin |
|              | 6  | 0 | 0 | Gemcitabine and Cisplatin               |
| 2Zhou,2021   | 11 | 7 | 0 | Sin 200mg q3w+GP                        |
|              | 2  | 1 | 0 | GP                                      |

|                |    |    |   |                               |
|----------------|----|----|---|-------------------------------|
| Ferris,2017    | 2  | 1  | 1 | Niv 3mg/kg q2w                |
|                | 0  | 0  | 0 | Chemo                         |
| Brahmer,2015   | 6  | 1  | 0 | Niv 3mg/kg q2w                |
|                | 1  | 0  | 1 | Chemo                         |
| Borghaei,2015  | 6  | 4  | 0 | Niv 3mg/kg q2w                |
|                | 0  | 0  | 0 | Chemo                         |
| Robert,2015    | 1  | 0  | 0 | Pem 10mg/kg q2w               |
|                | 5  | 1  | 0 | Pem 10mg/kg q3w               |
|                | 1  | 1  | 0 | Ipi 3 mg/kg q3w               |
| Carbone,2017   | 7  | 3  | 1 | Niv 3mg/kg q2w                |
| 45             | 0  | 0  | 0 | Chemo                         |
| Hellmann,2018  | 9  | 5  | 1 | Niv 1mg/kg q2w                |
|                | 28 | 15 | 1 | Niv 1mg/kg q2w+Ipi 1mg/kg q6w |
|                | 3  | 1  | 1 | Chemo                         |
| Eggermont,2015 | 0  | 0  | 0 | Ipi 10 mg/kg q3w              |
|                | 4  | 4  | 0 | Placebo                       |
| Eng,2019       | 1  | 1  | 0 | Ate 1200mg q3w                |
|                | 1  | 1  | 0 | Ate 840mg q2w+Cobimetinib     |
|                | 0  | 0  | 0 | Regorafenib                   |
| Long,2019      | 10 | 3  | 0 | Pem 200mg q3w                 |
|                | 7  | 3  | 0 | Pem 200mg q3w+Epacadostat     |
| Reck,2016      | 1  | 1  | 0 | Chemo                         |
|                | 2  | 1  | 0 | Ipi 10mg/kg q3w+Chemo         |
| Socinski,2018  | 10 | 5  | 0 | Ate 1200mg q3w+TTD+Chemo      |
|                | 0  | 0  | 0 | TTD+chemo                     |

|                |    |    |   |                                |
|----------------|----|----|---|--------------------------------|
| Yang,2019      | 1  | 1  | 0 | Dur 10mg/kg q2w+Osimertinib    |
|                | 0  | 0  | 0 | Osimertinib                    |
| Horn,2018      | 3  | 1  | 0 | Ate 1200mg q3w+Chemo           |
|                | 4  | 2  | 0 | Chemo                          |
| Gogas,2020     | 0  | 0  | 0 | Pem 200mg q3w                  |
|                | 3  | 3  | 0 | Ate 840mg q2w+TTD              |
| Powlers,2018   | 4  | 4  | 0 | Ate 1200mg q3w                 |
|                | 2  | 2  | 0 | Chemo                          |
| Barlesi,2018   | 8  | 5  | 3 | Ave 10mg/kg q2w                |
|                | 3  | 2  | 1 | Docetaxel                      |
| Burtness,2019  | 4  | 2  | 1 | Pem 200mg q3w                  |
|                | 5  | 4  | 1 | Pem 200mg q3w+Chemo            |
|                | 2  | 2  | 0 | TTD+Chemo                      |
| Bajorin,2021   | 0  | 0  | 0 | Placebo                        |
|                | 3  | 1  | 2 | Niv 240mg q2w                  |
| Fennell,2021   | 0  | 0  | 0 | Placebo                        |
|                | 1  | 1  | 0 | Niv 240mg q2w                  |
| Boyer,2021     | 32 | 14 | 0 | Pem 200mg q3w+Ipi 1mg/kg q6w   |
|                | 13 | 6  | 0 | Pem 200mg q3w                  |
| Govindan,2017  | 2  | 2  | 0 | Chemo                          |
|                | 4  | 1  | 0 | Ipi 10mg/kg q3w+Chemo          |
| Planchard,2020 | 1  | 0  | 0 | Dur 10mg/kg q2w                |
|                | 7  | 5  | 0 | Dur 20mg/kg q4w+Tre 1mg/kg q4w |
|                | 1  | 0  | 0 | Soc                            |
|                | 0  | 0  | 0 | Tre 10mg/kg q4w                |

|                      |    |    |   |                                           |
|----------------------|----|----|---|-------------------------------------------|
| Weber,2015           | 2  | 2  | 0 | Niv 3mg/kg q2w                            |
|                      | 0  | 0  | 0 | Chemo                                     |
| Ferris,2020          | 3  | 3  | 0 | Dur 10mg/kg q2w                           |
|                      | 1  | 1  | 0 | Chemo                                     |
|                      | 3  | 3  | 0 | Dur 20mg/kg q4w+Tre 1mg/kg q4w            |
| Pujade-Lauraine,2021 | 1  | 1  | 0 | Ave 10mg/kg q2w                           |
|                      | 1  | 1  | 0 | Ave 10mg/kg q2w+PLD                       |
|                      | 1  | 1  | 0 | PLD                                       |
| Rini,2019            | 8  | 8  | 0 | Ate 1200mg q3w+Bevacizumab                |
|                      | 0  | 0  | 0 | Sunitinib                                 |
| Beer,2016            | 0  | 0  | 0 | Placebo                                   |
|                      | 6  | 5  | 1 | Ipi 10mg/kg q3w                           |
| Mario,2015           | 0  | 0  | 0 | Dacarbazine                               |
|                      | 2  | 2  | 0 | Ipi 10mg/kg q3w+Dacarbazine               |
| 2Motzer,2020         | 16 | 16 | 0 | Niv 3mg/kg q3w+Ipi 1mg/kg q3w             |
|                      | 1  | 1  | 0 | Sunitinib                                 |
| West,2019            | 10 | 8  | 2 | Ate 1200mg q3w+carboplatin+nab-paclitaxel |
|                      | 3  | 3  | 0 | Chemo                                     |
| Baas,2021            | 9  | 8  | 1 | Niv 3mg/kg q2w+Ipi 1mg/kg q6w             |
|                      | 0  | 0  | 0 | Chemo                                     |
| Lee,2021             | 6  | 6  | 0 | Ave 10mg/kg q2w+Chemo                     |
|                      | 1  | 1  | 0 | Chemo                                     |
| Moehler,2021         | 4  | 4  | 0 | Ave 10mg/kg q2w                           |
|                      | 1  | 1  | 0 | Chemo                                     |
| Kato,2019            | 5  | 3  | 2 | Niv 240mg q2w                             |

|                |    |    |   |                                            |
|----------------|----|----|---|--------------------------------------------|
|                | 6  | 5  | 1 | Chemo                                      |
| 2Choueiri,2021 | 0  | 0  | 0 | Placebo                                    |
|                | 4  | 0  | 0 | Pem 200mg q3w                              |
| Gettinger,2021 | 6  | 5  | 1 | Niv 3mg/kg q2w                             |
|                | 9  | 7  | 2 | Niv 3mg/kg q2w+Ipi 1mg/kg q6w              |
| Motzer,2021    | 19 | 7  | 0 | Pem 200mg q3w+Lenvatinib                   |
|                | 26 | 1  | 0 | Lenvatinib+Everolimus                      |
|                | 1  | 0  | 1 | Sunitinib                                  |
| Monk,2021      | 0  | 0  | 0 | Chemotherapy followed by Ave 10mg/kg q2w   |
|                | 2  | 2  | 0 | Ave 10mg/kg q3w+Chemo followed by avelumab |
|                | 0  | 0  | 0 | Chemo                                      |
| NCT02481830    | 11 | 11 | 0 | Niv 240mg q2w                              |
|                | 0  | 0  | 0 | Chemo                                      |
| NCT03361865    | 1  | 1  | 0 | Pem 200mg q3w+TTD                          |
|                | 4  | 0  | 0 | Pem 200mg q3w                              |
| NCT03358472    | 0  | 0  | 0 | Pem 200mg q3w                              |
|                | 2  | 2  | 0 | Pem 200mg q3w+TTD                          |
|                | 0  | 0  | 0 | Chemo                                      |
| NCT02279732    | 1  | 1  | 0 | Chemo                                      |
|                | 0  | 0  | 0 | Ipi 10mg/kg q3w+Chemo                      |
| NCT02611960    | 3  | 3  | 0 | Pem 200mg q3w                              |
|                | 0  | 0  | 0 | Chemo                                      |
| NCT02864394    | 14 | 14 | 0 | Pem 200mg q3w                              |
|                | 2  | 2  | 0 | Chemo                                      |
| NCT02576509    | 6  | 6  | 0 | Niv 240mg q2w                              |



|                |    |   |   |                                                          |
|----------------|----|---|---|----------------------------------------------------------|
|                | 0  | 0 | 0 | Sorafenib                                                |
| NCT03016312    | 1  | 1 | 0 | Ate 1200mg q3w+Enzalutamide                              |
|                | 0  | 0 | 0 | Enzalutamide                                             |
| Voss,2022      | 2  | 0 | 0 | MEDI0680+durvalumab                                      |
|                | 1  | 1 | 0 | Nivolumab                                                |
| Loibl,2019     | 1  | 0 | 0 | durvalumab                                               |
|                | 1  | 0 | 0 | placebo                                                  |
| McDermott,2018 | 0  | 0 | 0 | Sunitinib                                                |
|                | 1  | 0 | 0 | atezolizumab                                             |
|                | 0  | 0 | 0 | atezolizumab + Bev                                       |
| NCT03563716    | 1  | 0 | 0 | Placebo+Ate 1200mg q3w                                   |
|                | 0  | 0 | 0 | Tiragolumab+Ate 1200mg q3w                               |
| Xu,2022        | 10 | 5 | 0 | sintilimab                                               |
|                | 1  | 0 | 0 | chemo                                                    |
| Taniguchi,2022 | 9  | 1 | 1 | nivolumab                                                |
|                | 8  | 2 | 0 | nivolumab + docetaxel                                    |
| Jung,2022      | 5  | 2 | 0 | Pembrolizumab+chemo                                      |
|                | 10 | 4 | 0 | Placebo+chemo                                            |
| NCT02879318    | 13 | 7 | 0 | Gemcitabine + Nab-Paclitaxel + Durvalumab + Tremelimumab |
|                | 4  | 1 | 0 | Gemcitabine Plus Nab-Paclitaxel                          |
| NCT03430063    | 0  | 0 | 0 | Cemiplimab 350 mg Q3W                                    |
|                | 1  | 1 | 0 | Cemiplimab 350 mg Q3W + Ipilimumab 50 mg Q6W             |
|                | 0  | 0 | 0 | Cemiplimab 1050 mg Q3W                                   |
| NCT03101566    | 0  | 0 | 0 | Gemcitabine + Cisplatin + Nivolumab                      |
|                | 1  | 1 | 0 | Nivolumab + Ipilimumab                                   |

|             |   |   |   |                                                     |
|-------------|---|---|---|-----------------------------------------------------|
| NCT03167619 | 0 | 0 | 0 | Olaparib                                            |
|             | 2 | 0 | 0 | Olaparib+Durvalumab                                 |
| NCT01903993 | 0 | 0 | 0 | Docetaxel                                           |
|             | 1 | 1 | 0 | Atezolizumab                                        |
| NCT02319044 | 1 | 1 | 0 | Durvalumab+Tremelimumab                             |
|             | 1 | 1 | 0 | Durvalumab                                          |
|             | 0 | 0 | 0 | Tremelimumab                                        |
| NCT02591615 | 2 | 0 | 0 | Pembrolizumab                                       |
|             | 1 | 0 | 0 | Carboplatin + Pemetrexed                            |
|             | 0 | 0 | 0 | Carboplatin + Paclitaxel                            |
| NCT02985957 | 1 | 1 | 0 | Nivolumab 3 mg/kg + Ipilimumab 1 mg/kg Q4W          |
|             | 4 | 0 | 0 | Nivolumab 1 mg/kg + Ipilimumab 3 mg/kg Q6W          |
|             | 2 | 1 | 0 | Ipilimumab 3 mg/kg                                  |
|             | 4 | 2 | 0 | Cabazitaxel 20 mg/m2 or 25 mg/m2 + Prednisone 10 mg |
| NCT02551159 | 9 | 9 | 0 | Durvalumab + Tremelimumab                           |
|             | 2 | 2 | 0 | Durvalumab                                          |
|             | 2 | 2 | 0 | Standard of Care (SOC)                              |
| NCT02603432 | 1 | 1 | 0 | Avelumab + Best Supportive Care (BSC)               |
|             | 0 | 0 | 0 | Best Supportive Care                                |
| NCT03553836 | 1 | 1 | 0 | Pembrolizumab                                       |
|             | 0 | 0 | 0 | Placebo                                             |
| NCT03033576 | 4 | 0 | 0 | Nivolumab + Ipilimumab                              |
|             | 0 | 0 | 0 | Ipilimumab                                          |
| NCT03875235 | 2 | 2 | 0 | Durvalumab + Gemcitabine + Cisplatin                |
|             | 2 | 2 | 0 | Placebo + Gemcitabine + Cisplatin                   |

|                 |    |    |   |                                                  |
|-----------------|----|----|---|--------------------------------------------------|
| NCT03517449     | 3  | 3  | 0 | Lenvatinib + Pembrolizumab                       |
|                 | 0  | 0  | 0 | Doxorubicin or Paclitaxel                        |
| NCT02870920     | 0  | 0  | 0 | Best Supportive Care                             |
|                 | 2  | 2  | 0 | Durvalumab + Tremelimumab + Best Supportive Care |
| NCT01843374     | 2  | 0  | 0 | TREMELIMUMAB                                     |
|                 | 0  | 0  | 0 | PLACEBO                                          |
| NCT01905657     | 24 | 15 | 0 | Pembrolizumab 2 mg/kg                            |
|                 | 18 | 10 | 0 | Pembrolizumab 10 mg/kg                           |
|                 | 3  | 2  | 0 | Docetaxel                                        |
| 1Choueiri,2021  | 13 | 3  | 0 | Niv 240mg q2w+Cabozantinib                       |
|                 | 0  | 0  | 0 | Sunitinib                                        |
| Cortes,2020     | 0  | 0  | 0 | Chemo                                            |
|                 | 20 | 6  | 0 | Pem 200mg q3w+Chemo                              |
| Finn,2020       | 1  | 0  | 0 | Placebo                                          |
|                 | 14 | 4  | 0 | Pem 200mg q3w                                    |
| Fuchs,2020      | 10 | 2  | 0 | Pem 200mg q3w                                    |
|                 | 0  | 0  | 0 | Paclitaxel                                       |
| Huang,2020      | 17 | 0  | 1 | Cam 200mg q2w                                    |
|                 | 0  | 0  | 0 | Chemo                                            |
| Miles,2021      | 19 | 2  | 1 | Ate 840mg q2w+Chemo                              |
|                 | 3  | 0  | 0 | Chemo                                            |
| Mittendorf,2020 | 3  | 1  | 0 | Ate 840mg q2w+Chemo                              |
|                 | 2  | 0  | 0 | Chemo                                            |
| Moore,2021      | 12 | 0  | 0 | Ate 1200mg q3w                                   |
|                 | 5  | 1  | 0 | Chemo+Bevacizumab                                |

|                   |    |    |   |                                    |
|-------------------|----|----|---|------------------------------------|
| Reck,2021         | 0  | 0  | 0 | Chemo                              |
|                   | 21 | 10 | 1 | Niv 360mg q2w+Ipi 1mg/kg q6w+Chemo |
| Rudin,2020        | 9  | 0  | 0 | Pem 200mg q3w                      |
|                   | 5  | 0  | 0 | Etoposide                          |
| Shitara,2020      | 9  | 8  | 1 | Pem 200mg q3w                      |
|                   | 8  | 8  | 0 | Pem 200mg q3w+Chemo                |
|                   | 1  | 0  | 1 | Chemo                              |
| Sugawara,2021     | 5  | 2  | 0 | Placebo                            |
|                   | 27 | 6  | 1 | Niv 360mg q3w                      |
| 1Zhou,2021        | 6  | 0  | 0 | Sin 200mg q3w+GP                   |
|                   | 0  | 0  | 0 | GP                                 |
| Reck,2019         | 16 | 3  | 1 | Pem 200mg q3w                      |
|                   | 2  | 1  | 0 | Chemo                              |
| Fehrenbacher,2018 | 13 | 4  | 0 | Ate 1200mg q3w                     |
|                   | 0  | 0  | 0 | Docetaxel                          |
| Paz-Ares,2018     | 9  | 2  | 1 | Pem 200mg q3w+Chemo                |
|                   | 25 | 6  | 1 | Chemo                              |
| Mok,2019          | 53 | 21 | 1 | Pem 200mg q3w                      |
|                   | 3  | 1  | 0 | Chemo                              |
| Paz-Ares,2019     | 0  | 0  | 0 | Dur 1500mg q4w+Chemo               |
|                   | 2  | 0  | 1 | Chemo                              |
| Gandhi,2018       | 29 | 8  | 3 | Pem 200mg q3w+Chemo                |
|                   | 9  | 3  | 1 | Chemo                              |
| Cohen,2019        | 6  | 3  | 0 | Placebo                            |

|                |    |   |   |                                              |
|----------------|----|---|---|----------------------------------------------|
|                | 13 | 3 | 0 | Pem 200mg q3w                                |
| Eggermont,2018 | 3  | 0 | 0 | Placebo                                      |
|                | 21 | 4 | 0 | Pem 200mg q3w                                |
| Kojima,2020    | 15 | 5 | 2 | Pem 200mg q3w                                |
|                | 2  | 1 | 0 | Chemo                                        |
| Finns,2020     | 4  | 0 | 2 | Ate 1200mg q3w                               |
|                | 0  | 0 | 0 | Sorafenib                                    |
| Owonikoko,2021 | 5  | 0 | 1 | Placebo                                      |
|                | 14 | 4 | 0 | Niv 240mg q2w                                |
|                | 27 | 8 | 0 | Niv 1mg/kg q3w+ Ipi 3mg/kg q3w               |
| 2Wu,2020       | 13 | 2 | 1 | Pem 200mg q3w                                |
|                | 0  | 0 | 0 | Chemo                                        |
| Usmani,2019    | 0  | 0 | 0 | Lenalidomide and Dexamethasone               |
|                | 1  | 0 | 0 | Pem 200mg q3w+Lenalidomide and Dexamethasone |
| Hamanishi,2021 | 3  | 0 | 0 | Niv 240 mg q2w                               |
|                | 4  | 0 | 0 | GEM or PLD                                   |
| Wang,2021      | 7  | 2 | 0 | Tis 200mg q3w+PC                             |
|                | 1  | 0 | 0 | PC                                           |
|                | 7  | 2 | 0 | Tis 200mg q3w+nab-PC                         |
| 2Robert,2015   | 3  | 0 | 0 | Niv 3mg/kg q2w                               |
|                | 0  | 0 | 0 | Chemo                                        |
| Schmid,2020    | 13 | 3 | 0 | Pem 200mg q3w+Chemo                          |
|                | 6  | 1 | 0 | Chemo                                        |
| Yang,2020      | 11 | 2 | 0 | Sin 200mg q3w+Chemo                          |

|                  |    |    |   |                                    |
|------------------|----|----|---|------------------------------------|
|                  | 3  | 1  | 0 | Chemo                              |
| Shitara,2018     | 10 | 1  | 1 | Pem 200mg q3w                      |
|                  | 0  | 0  | 0 | Paclitaxel                         |
| Mateos,2019      | 0  | 0  | 0 | Chemo                              |
|                  | 5  | 1  | 0 | Tis 200mg q3w+PC                   |
| Lu,2021          | 20 | 10 | 3 | Tislelizumab+Chemo                 |
|                  | 1  | 0  | 1 | Chemo                              |
| Scherpereel,2019 | 1  | 0  | 0 | Niv 3mg/kg q2w                     |
|                  | 2  | 1  | 0 | Niv 3mg/kg q2w+Ipi 1mg/kg q6w      |
| Zhou,2023        | 31 | 18 | 0 | Tislelizumab 200 mg q3w            |
|                  | 0  | 0  | 0 | placebo+ Cobimetinib + Vemurafenib |
| Johnson,2023     | 12 | 3  | 0 | Niv 3mg/kg q2w                     |
|                  | 10 | 4  | 0 | Dur 1500mg+Chemo                   |
|                  | 2  | 2  | 0 | Chemo                              |
| Forde,2022       | 2  | 0  | 0 | Niv 360mg q3w+Chemo                |
|                  | 1  | 1  | 0 | Niv 360mg q3w+Chemo                |
| Jr,2023          | 24 | 4  | 3 | Niv 3mg/kg q2w                     |
|                  | 1  | 0  | 0 | Chemo                              |
| Herbst,2022      | 11 | 0  | 2 | Dur 1500mg q4w                     |
|                  | 11 | 0  | 1 | Dur 1500mg q4w+Oleclumab           |
|                  | 10 | 1  | 0 | Dur 1500mg q4w+Monalizumab         |
| Diaz,2022        | 6  | 0  | 0 | Pem 200 mg q3w                     |
|                  | 2  | 0  | 0 | Chemo                              |
| Rossevoid,2022   | 1  | 0  | 0 | Chemo                              |
|                  | 4  | 2  | 0 | Ate 840 mg q2w+Chemo               |

|                   |    |    |   |                                            |
|-------------------|----|----|---|--------------------------------------------|
| Park,2022         | 3  | 0  | 1 | Dur 20 mg/kg q4w                           |
|                   | 1  | 0  | 0 | Placebo                                    |
| Cheng,2022        | 5  | 0  | 0 | Ate 1200mg+Bevacizumab q3w                 |
|                   | 0  | 0  | 0 | Sorafenib                                  |
| Leighl,2022       | 9  | 3  | 0 | Dur 1500 mg + Tre 75mg + Chemo q3w         |
|                   | 9  | 4  | 0 | Pem 200 mg q3w                             |
| 2Cheng,2022       | 1  | 1  | 0 | Serplulimab 4.5mg/kg q3w                   |
|                   | 2  | 0  | 0 | Placebo                                    |
| Kato,2023         | 16 | 4  | 0 | Niv 3 mg/kg q2w+Ipi 1 mg/kg q6w            |
|                   | 7  | 0  | 0 | Chemo                                      |
|                   | 0  | 0  | 0 | Placebo                                    |
| NCT03459846       | 1  | 1  | 0 | Niv 1mg/kg+Ipi 3mg/kg q3w                  |
|                   | 0  | 0  | 0 | Dur 1500mg q4w+Placebo                     |
| Peters,2021       | 22 | 7  | 0 | Niv 1mg/kg+Ipi 3mg/kg q3w                  |
|                   | 4  | 1  | 0 | Placebo                                    |
| Klein,2021        | 2  | 2  | 0 | Niv 3mg/kg q2w+Ipi 3 mg/kg and 1 mg/kg q4w |
| Mamdani,2021      | 1  | 0  | 0 | Dur 1500mg q4w                             |
| O'Malley,2021     | 5  | 2  | 0 | Balstilimab 3 mg/kg q2w                    |
| Hughes,2021       | 6  | 5  | 0 | Pem 200mg q3w                              |
| Edenfield,2021    | 1  | 0  | 1 | Dur 1500 mg q4w+Tre 75mg q4w               |
| Bi,2021           | 2  | 1  | 0 | Niv 240mg q2w                              |
| Ardizzoni,2021    | 48 | 16 | 9 | Ate 1200mg q3w                             |
| Rodriguez,2020    | 1  | 0  | 1 | Pem 200mg q3w                              |
| Nomura,2020       | 1  | 1  | 0 | Niv 2mg/kg q3w                             |
| Morgensztern,2020 | 2  | 0  | 1 | Dur 1125mg q3w+nab-paclitaxel              |

|                  |   |   |   |                                    |
|------------------|---|---|---|------------------------------------|
| Mei,2020         | 2 | 1 | 0 | Cam 200mg q3w+Chemo                |
| Lan,2020         | 1 | 0 | 0 | Cam 200mg q2w+apatinib 250mg qd    |
| Dudek,2020       | 2 | 0 | 0 | Pem 200mg q3w+bevacizumab 15 mg/kg |
| Vinayak,2019     | 1 | 1 | 0 | Pem 200mg q3w+ niraparib           |
| Okada,2019       | 2 | 0 | 0 | Niv 240mg q2w                      |
| Habra,2019       | 1 | 0 | 0 | Pem 200mg q3w                      |
| Fujimoto,2019    | 2 | 2 | 0 | Niv                                |
| Kim,2020         | 1 | 1 | 0 | Niv 240mg q2w                      |
| Rothschild,2021  | 2 | 1 | 0 | Dur 750mg q2w+Chemo                |
| McDermott,2021   | 3 | 3 | 0 | Pem 200mg q3w                      |
| Balar,2021       | 3 | 3 | 0 | Pem 200mg q3w                      |
| Antonarakis,2020 | 6 | 5 | 1 | Pem 200mg q3w                      |
| Bauml,2017       | 6 | 4 | 1 | Pem 200mg q3w                      |
| NCT02927301      | 8 | 0 | 0 | Ate 1200mg q3w                     |

Abbreviations: PAEs, [pulmonary](#) adverse events; Niv, Nivolumab; Ipi, Ipilimumab; TTD, Targeted therapy drug; Chemo, Chemotherapy; Pem, Pembrolizumab; Ate, Atezolizumab; Ave, Avelumab; Dur, Durvalumab; Tre, Tremelimumab; Cam,Camrelizumab; Cem,Cemiplimab;Sin,Sintilimab;Tis,Tislelizumab.Soc,standard of care.

**Table S4. Fatal Pulmonary Adverse Events Outcome: League Table**







**(C) skin cancer**

|                           |                           |                           |                           |                          |                           |                        |                           |     |  |
|---------------------------|---------------------------|---------------------------|---------------------------|--------------------------|---------------------------|------------------------|---------------------------|-----|--|
| Chemo                     |                           |                           |                           |                          |                           |                        |                           |     |  |
| -11.38<br>(-37.48, -0.96) | CTLA4                     |                           |                           |                          |                           |                        |                           |     |  |
| -14.04<br>(-51.2, -0.74)  | -2.57<br>(-40.7, 26.32)   | CTLA4+Chemo               |                           |                          |                           |                        |                           |     |  |
| -11.88<br>(-38, -1.62)    | -0.52<br>(-1.96, 0.95)    | 2.01<br>(-26.68, 40.25)   | PD1                       |                          |                           |                        |                           |     |  |
| -13.45<br>(-39.45, -2.84) | -1.97<br>(-4.34, -0.11)   | 0.54<br>(-28.33, 38.77)   | -1.46<br>(-3.91, 0.45)    | PD1+CTLA4                |                           |                        |                           |     |  |
| -11.56<br>(-37.65, -0.93) | -0.15<br>(-2.84, 2.62)    | 2.39<br>(-26.46, 40.76)   | 0.38<br>(-1.95, 2.71)     | 1.83<br>(-1.06, 5.29)    | PD1+TTD                   |                        |                           |     |  |
| -29.17<br>(-62.78, -7.32) | -16.04<br>(-41.72, -1.67) | -14.14<br>(-52.55, 28.76) | -15.49<br>(-41.12, -1.28) | -14.02<br>(-39.73, 0.5)  | -15.87<br>(-41.6, -1.41)  | PDL1+TTD               |                           |     |  |
| -9.14<br>(-35.53, 1.43)   | 2.11<br>(0.15, 5.01)      | 4.82<br>(-24.03, 43.17)   | 2.63<br>(0.93, 5.25)      | 4.1<br>(1.71, 7.84)      | 2.24<br>(-0.45, 5.9)      | 18.27<br>(3.76, 43.92) | Placebo                   |     |  |
| -28.42<br>(-62.06, -6.42) | -15.25<br>(-41.01, -0.69) | -13.38<br>(-51.79, 29.59) | -14.72<br>(-40.39, -0.29) | -13.23<br>(-39.03, 1.48) | -15.09<br>(-40.84, -0.43) | 0.79<br>(-1.46, 3.03)  | -17.48<br>(-43.18, -2.78) | TTD |  |

**(D) head and neck cancer**

|                           |                          |                           |                           |                         |                        |                       |                       |                       |           |
|---------------------------|--------------------------|---------------------------|---------------------------|-------------------------|------------------------|-----------------------|-----------------------|-----------------------|-----------|
| Chemo                     |                          |                           |                           |                         |                        |                       |                       |                       |           |
| 10.4<br>(-2.12, 40.94)    | CTLA4                    |                           |                           |                         |                        |                       |                       |                       |           |
| -1.36<br>(-4, 0.27)       | -11.88<br>(-42.38, 0.6)  | PD1                       |                           |                         |                        |                       |                       |                       |           |
| -0.89<br>(-3.14, 0.72)    | -11.36<br>(-41.85, 1.19) | 0.46<br>(-1.28, 2.67)     | PD1+Chemo                 |                         |                        |                       |                       |                       |           |
| -13.53<br>(-44.51, -1.97) | -26.76<br>(-68.6, -4.51) | -12.04<br>(-43.04, -0.61) | -12.61<br>(-43.58, -0.98) | PD1+TTD                 |                        |                       |                       |                       |           |
| -1.06<br>(-3.95, 1.08)    | -11.52<br>(-42.02, 0.6)  | 0.31<br>(-2.2, 3.06)      | -0.16<br>(-3.1, 2.61)     | 12.45<br>(0.62, 43.32)  | PDL1                   |                       |                       |                       |           |
| -2.12<br>(-6, 0.63)       | -12.7<br>(-43.27, 0.43)  | -0.76<br>(-4.86, 3.19)    | -1.23<br>(-5.35, 2.4)     | 11.36<br>(-0.96, 42.26) | -1.08<br>(-5.45, 2.98) | PD1+Chemo             |                       |                       |           |
| -1.36<br>(-4.16, 0.75)    | -11.79<br>(-42.29, 0.31) | 0.02<br>(-2.4, 2.78)      | -0.46<br>(-3.3, 2.32)     | 12.14<br>(0.37, 43.09)  | -0.29<br>(-1.85, 1.32) | 0.79<br>(-3.21, 5.11) | PDL1+CTLA4            |                       |           |
| -0.6<br>(-3.48, 1.45)     | -11.08<br>(-41.57, 1.29) | 0.76<br>(-1.11, 2.85)     | 0.31<br>(-2.4, 2.73)      | 12.84<br>(1.19, 43.85)  | 0.45<br>(-1.84, 2.71)  | 1.53<br>(-2.55, 5.84) | 0.74<br>(-1.51, 2.91) | Placebo               |           |
| -0.24<br>(-3.44, 2.57)    | -10.66<br>(-41.13, 2.12) | 1.15<br>(-1.18, 3.96)     | 0.67<br>(-1.86, 3.33)     | 13.32<br>(1.48, 44.33)  | 0.86<br>(-2.57, 4.43)  | 1.97<br>(-2.4, 6.56)  | 1.16<br>(-2.29, 4.65) | 0.38<br>(-2.63, 3.67) | TTD+Chemo |

**(E) digestive system cancer**

|                            |                           |                           |                           |                          |                            |                         |                        |                        |                        |
|----------------------------|---------------------------|---------------------------|---------------------------|--------------------------|----------------------------|-------------------------|------------------------|------------------------|------------------------|
| Chemo                      |                           |                           |                           |                          |                            |                         |                        |                        |                        |
| -2.39<br>(-4.02, -1.33)    | PD1                       |                           |                           |                          |                            |                         |                        |                        |                        |
| -2.6<br>(-4.69, -0.98)     | -0.21<br>(-2.19, 1.88)    | PD1+Chemo                 |                           |                          |                            |                         |                        |                        |                        |
| -4.09<br>(-7.94, -1.57)    | -1.69<br>(-5.32, 1.15)    | -1.47<br>(-4.7, 0.8)      | PD1+CTLA4                 |                          |                            |                         |                        |                        |                        |
| -24.33<br>(-75.52, -1.89)  | -21.91<br>(-73.01, 0.63)  | -21.72<br>(-72.78, 0.93)  | -20.24<br>(-71.18, 2.78)  | PD1+TTD                  |                            |                         |                        |                        |                        |
| -1.25<br>(-4.44, 1.71)     | 1.16<br>(-1.92, 4.44)     | 1.37<br>(-2.09, 4.99)     | 2.86<br>(-1.07, 7.77)     | 23.12<br>(0.3, 74.17)    | PDL1                       |                         |                        |                        |                        |
| -38.69<br>(-122.03, -1.44) | -36.22<br>(-119.45, 1.02) | -36.03<br>(-119.28, 1.27) | -34.42<br>(-117.66, 2.95) | -13.4<br>(-95.26, 47.63) | -37.44<br>(-120.73, -0.05) | PDL1+CTLA4              |                        |                        |                        |
| -0.54<br>(-3.74, 2.62)     | 1.84<br>(-1.32, 5.58)     | 2.06<br>(-1.41, 5.94)     | 3.53<br>(-0.32, 8.71)     | 23.83<br>(0.97, 75.01)   | 0.71<br>(-3.64, 5.17)      | 38.14<br>(0.69, 121.51) | PDL1+CTLA4+Chemo       |                        |                        |
| 0.01<br>(-3.73, 3.57)      | 2.42<br>(-1.15, 6.24)     | 2.63<br>(-1.32, 6.75)     | 4.12<br>(-0.2, 9.44)      | 24.4<br>(1.4, 75.48)     | 1.27<br>(-1.31, 3.79)      | 38.69<br>(1.29, 122.01) | 0.56<br>(-4.34, 5.34)  | PDL1+TTD               |                        |
| 0.33<br>(-2.4, 3.45)       | 2.74<br>(0.36, 5.99)      | 2.96<br>(-0.09, 6.64)     | 4.48<br>(0.86, 9.4)       | 24.76<br>(1.95, 75.83)   | 1.6<br>(-1.29, 4.92)       | 39.06<br>(1.97, 122.22) | 0.91<br>(-3.3, 5.31)   | 0.33<br>(-2.83, 3.96)  | Placebo                |
| 29.12<br>(3.51, 95.23)     | 31.57<br>(5.94, 97.68)    | 31.77<br>(6.07, 97.97)    | 33.38<br>(7.46, 99.62)    | 57.64<br>(14.57, 140.61) | 30.37<br>(4.93, 96.54)     | 74.81<br>(14.88, 175.6) | 29.65<br>(3.77, 95.82) | 29.08<br>(3.73, 95.23) | 28.76<br>(3.14, 94.89) |

**Table S6. Grade 3-4 Treatment-related Pulmonary Adverse Events in Tumors of Different Systems Outcome: League Table**  
**(A) respiratory system cancer**



**(C) skin cancer**

|                           |                           |                           |                           |                          |                           |                          |                           |     |
|---------------------------|---------------------------|---------------------------|---------------------------|--------------------------|---------------------------|--------------------------|---------------------------|-----|
| Chemo                     |                           |                           |                           |                          |                           |                          |                           |     |
| -9.87<br>(-36.14, 0.93)   | CTLA4                     |                           |                           |                          |                           |                          |                           |     |
| -16.31<br>(-53.26, -0.65) | -5.84<br>(-44.26, 24.77)  | CTLA4+Chemo               |                           |                          |                           |                          |                           |     |
| -9.71<br>(-36.01, 0.71)   | 0.05<br>(-1.99, 2.12)     | 5.91<br>(-24.55, 44.39)   | PD1                       |                          |                           |                          |                           |     |
| -11.32<br>(-37.8, -0.42)  | -1.45<br>(-4.14, 1.18)    | 4.38<br>(-26.25, 42.93)   | -1.51<br>(-4.23, 1.09)    | PD1+CTLA4                |                           |                          |                           |     |
| -9.78<br>(-36.06, 1.25)   | 0.05<br>(-3.51, 3.65)     | 5.88<br>(-24.71, 44.44)   | -0.01<br>(-2.97, 2.97)    | 1.52<br>(-2.41, 5.51)    | PD1+TTD                   |                          |                           |     |
| -30.76<br>(-68.2, -5.49)  | -17.56<br>(-51.77, -1.16) | -12.56<br>(-56.12, 30.27) | -17.62<br>(-51.84, -1.51) | -16.11<br>(-50.43, 0.38) | -17.65<br>(-51.93, -1.09) | PD1+TTD                  |                           |     |
| 13.8<br>(-20.86, 66.89)   | 25.37<br>(3.62, 75)       | 34.1<br>(-7.78, 90.38)    | 25.37<br>(3.6, 75.13)     | 26.88<br>(4.93, 76.75)   | 25.35<br>(3.28, 75.27)    | 46.26<br>(10.75, 102.88) | Placebo                   |     |
| -6.53<br>(-53.99, 48.28)  | 4.42<br>(-37.72, 60.06)   | 12.11<br>(-41.12, 72.44)  | 4.36<br>(-37.03, 60.03)   | 5.89<br>(-35.63, 61.63)  | 4.38<br>(-37.27, 60.02)   | 22.5<br>(1.51, 73.96)    | -22.02<br>(-86.73, 37.87) | TTD |

**(D) head and neck cancer**

|                           |                           |                           |                         |                        |                        |                        |                        |                        |           |
|---------------------------|---------------------------|---------------------------|-------------------------|------------------------|------------------------|------------------------|------------------------|------------------------|-----------|
| Chemo                     |                           |                           |                         |                        |                        |                        |                        |                        |           |
| 9.47<br>(-3.4, 45.71)     | CTLA4                     |                           |                         |                        |                        |                        |                        |                        |           |
| -2.64<br>(-6.67, -0.15)   | -12.38<br>(-48.92, 0.42)  | PD1                       |                         |                        |                        |                        |                        |                        |           |
| -3.7<br>(-8.45, -0.58)    | -13.49<br>(-50.11, -0.32) | -1.01<br>(-3.81, 1.36)    | PD1+Chemo               |                        |                        |                        |                        |                        |           |
| -18.05<br>(-52.46, -3.11) | -30.9<br>(-76.26, -5.39)  | -15.16<br>(-49.92, -0.55) | -14.1<br>(-49.18, 0.83) | PD1+TTD                |                        |                        |                        |                        |           |
| -2.12<br>(-5.64, 0.51)    | -11.72<br>(-48.02, 0.64)  | 0.51<br>(-2.27, 3.92)     | 1.57<br>(-1.94, 5.93)   | 15.77<br>(0.71, 50.45) | PDL1                   |                        |                        |                        |           |
| -2.13<br>(-5.79, 0.65)    | -11.8<br>(-48.18, 1.67)   | 0.51<br>(-3.83, 5.48)     | 1.55<br>(-3.12, 7.11)   | 15.96<br>(0.44, 50.4)  | -0.03<br>(-4.44, 4.49) | PD1+Chemo              |                        |                        |           |
| -2.42<br>(-5.9, 0.15)     | -12<br>(-48.31, 0.33)     | 0.21<br>(-2.5, 3.59)      | 1.25<br>(-2.17, 5.62)   | 15.49<br>(0.42, 50.18) | -0.31<br>(-1.89, 1.3)  | -0.29<br>(-4.74, 4.14) | PD1+CTLA4              |                        |           |
| -2.15<br>(-5.9, 0.59)     | -11.79<br>(-48.13, 0.83)  | 0.51<br>(-1.69, 3.1)      | 1.54<br>(-1.57, 5.34)   | 15.75<br>(0.84, 50.65) | -0.01<br>(-2.49, 2.26) | 0.01<br>(-4.72, 4.46)  | 0.29<br>(-2.12, 2.46)  | Placebo                |           |
| -2.79<br>(-7.71, 0.83)    | -12.54<br>(-49.15, 0.71)  | -0.12<br>(-3.09, 2.79)    | 0.9<br>(-1.62, 3.72)    | 15.05<br>(0, 50.19)    | -0.65<br>(-5.16, 3.23) | -0.62<br>(-6.37, 4.32) | -0.34<br>(-4.84, 3.47) | -0.64<br>(-4.58, 2.92) | TTD+Chemo |

**(E) digestive system cancer**

|                           |                           |                          |                          |                          |                          |                           |                         |                         |                         |
|---------------------------|---------------------------|--------------------------|--------------------------|--------------------------|--------------------------|---------------------------|-------------------------|-------------------------|-------------------------|
| Chemo                     |                           |                          |                          |                          |                          |                           |                         |                         |                         |
| -2.27<br>(-4.88, -0.35)   | PD1                       |                          |                          |                          |                          |                           |                         |                         |                         |
| -2.21<br>(-5.5, 0.58)     | 0.03<br>(-3.05, 3.38)     | PD1+Chemo                |                          |                          |                          |                           |                         |                         |                         |
| -21.19<br>(-63.94, -4.62) | -18.84<br>(-61.76, -2.23) | -18.85<br>(-61.75, -2.6) | PD1+CTLA4                |                          |                          |                           |                         |                         |                         |
| -23.07<br>(-72.13, -1.38) | -20.75<br>(-69.84, 1.18)  | -20.82<br>(-70, 1.25)    | -0.68<br>(-54.33, 42.72) | PD1+TTD                  |                          |                           |                         |                         |                         |
| -1.72<br>(-6.78, 2.88)    | 0.54<br>(-4.71, 6)        | 0.49<br>(-5.2, 6.24)     | 19.44<br>(1.81, 62.28)   | 21.36<br>(-1.24, 70.52)  | PDL1                     |                           |                         |                         |                         |
| -6.95<br>(-76.91, 44.9)   | -4.63<br>(-74.52, 47.21)  | -4.78<br>(-74.61, 47.22) | 15.51<br>(-55.95, 82.14) | 18.06<br>(-58.45, 87.29) | -5.22<br>(-75.25, 46.76) | PDL1+CTLA4                |                         |                         |                         |
| -1.67<br>(-6.8, 2.94)     | 0.59<br>(-4.71, 6.06)     | 0.55<br>(-5.22, 6.27)    | 19.52<br>(1.86, 62.16)   | 21.38<br>(-1.22, 70.44)  | 0.05<br>(-6.85, 6.87)    | 5.23<br>(-46.99, 75.31)   | PDL1+CTLA4+Chemo        |                         |                         |
| -0.92<br>(-8.15, 6.13)    | 1.36<br>(-5.94, 9.04)     | 1.31<br>(-6.38, 9.18)    | 20.39<br>(1.53, 63.34)   | 22.24<br>(-1.31, 71.56)  | 0.83<br>(-4.44, 6.18)    | 6.07<br>(-45.98, 76.29)   | 0.78<br>(-7.82, 9.45)   | PDL1+TTD                |                         |
| 20.45<br>(-0.26, 60.44)   | 22.79<br>(2.29, 62.81)    | 22.79<br>(1.89, 62.79)   | 43.49<br>(12.19, 104.1)  | 47.65<br>(8.94, 103.77)  | 22.34<br>(0.76, 62.32)   | 28.17<br>(0.81, 91.93)    | 22.25<br>(0.69, 62.62)  | 21.61<br>(-0.93, 61.59) | Placebo                 |
| 29.31<br>(1.67, 100.56)   | 31.65<br>(4.06, 102.82)   | 31.61<br>(3.75, 103.06)  | 55<br>(14.98, 131.05)    | 57.61<br>(11.82, 141.88) | 31.11<br>(3.21, 102.48)  | 40.72<br>(-25.29, 137.13) | 31.11<br>(2.76, 102.39) | 30.31<br>(1.84, 101.7)  | 8.69<br>(-41.83, 84.37) |

**Table S7. Model Selection of All Outcomes**

| Comparison of the fit of consistency and inconsistency model using deviance information criteria (DIC) |                    |                     |               |      |
|--------------------------------------------------------------------------------------------------------|--------------------|---------------------|---------------|------|
|                                                                                                        | MODEL              |                     |               |      |
| outcomes                                                                                               | consistency, fixed | consistency, random | inconsistency | PSRF |
| All-grade Tr-PAEs                                                                                      | 703.7917           | 547.6197            | 556.0919      | 1.19 |
| Grade3-4 Tr-PAEs                                                                                       | 488.1327           | 456.8177            | 464.4705      | 1.17 |
| Fatal PAEs                                                                                             | 158.85443          | 159.70449           | 162.75541     | 1.18 |

**Table S8. Inconsistency Test Between Direct and Indirect Treatment Comparisons in Mixed Treatment Comparisons for (A)all-grade treatment-related PAEs,(B)grade 3-4 treatment-related PAEs,(C)fatal PAEs**

**A. All-grade treatment-related PAEs**

| Side  | Direct     |           | Indirect   |           | Difference |           |       |
|-------|------------|-----------|------------|-----------|------------|-----------|-------|
|       | Coef.      | Std. Err. | Coef.      | Std. Err. | Coef.      | Std. Err. | P>z   |
| A C   | -2.350123  | 1.601566  | 0.2094313  | 0.4189967 | -2.559555  | 1.655313  | 0.122 |
| A E   | 1.362521   | 0.311908  | 1.072779   | 0.4529323 | 0.2897427  | 0.5464719 | 0.596 |
| A F   | 0.9205155  | 0.4522462 | 1.165485   | 0.4296995 | -0.2449696 | 0.6206125 | 0.693 |
| A G   | 1.680885   | 0.9357411 | 0.4213663  | 0.4835466 | 1.259519   | 1.053297  | 0.232 |
| A L   | -0.849981  | 1.052562  | 1.30529    | 0.4443372 | -2.155271  | 1.145763  | 0.06  |
| A M   | 1.723672   | 0.7786326 | 1.604044   | 0.3813169 | 0.1196286  | 0.867692  | 0.89  |
| A N   | 0.9240764  | 0.8405671 | 1.689935   | 0.4364163 | -0.7658583 | 0.9486361 | 0.419 |
| B E   | 1.772901   | 0.2066284 | 0.8123633  | 0.3168104 | 0.9605381  | 0.3780175 | 0.111 |
| B F   | 1.149959   | 0.3742743 | 1.439567   | 0.4213403 | -0.2896078 | 0.5656175 | 0.609 |
| B G   | -0.2965388 | 0.6652396 | 1.49869    | 0.4746896 | -1.795229  | 0.7960809 | 0.024 |
| B H   | 0.7081886  | 0.2375496 | 1.312547   | 0.4547172 | -0.6043581 | 0.5206062 | 0.246 |
| B I * | 0.8227199  | 0.3038083 | 1.28486    | 1.536862  | -0.4621401 | 1.583351  | 0.77  |
| B J * | 0.5529454  | 0.688027  | 0.5696789  | 385.7154  | -0.0167335 | 385.7161  | 1     |
| B K   | 1.893203   | 1.135674  | 1.520656   | 0.4899315 | 0.372547   | 1.247747  | 0.765 |
| B M   | 1.16858    | 0.4792795 | 2.216794   | 0.3441832 | -1.048213  | 0.6056366 | 0.083 |
| B N   | 2.167829   | 0.511103  | 1.340159   | 0.5112433 | 0.8276706  | 0.7579703 | 0.275 |
| B P * | 3.735811   | 1.556121  | -1.965384  | 353.397   | 5.701195   | 353.406   | 0.987 |
| B Q   | 0.9400841  | 0.6251616 | 1.564062   | 0.7491607 | -0.6239777 | 1.01645   | 0.539 |
| C E   | 0.697633   | 0.5459294 | 1.583294   | 0.4526364 | -0.8856612 | 0.7019443 | 0.207 |
| C F   | 2.050168   | 0.8999941 | 0.7830977  | 0.4186971 | 1.26707    | 0.9872451 | 0.199 |
| C K   | 1.155372   | 0.5233319 | 1.59284    | 0.6834486 | -0.437468  | 0.8455463 | 0.605 |
| C L   | 0.9245312  | 0.4507418 | 0.9581692  | 0.6973516 | -0.0336381 | 0.8262087 | 0.968 |
| C M   | 2.750395   | 1.197147  | 1.42664    | 0.4396093 | 1.323755   | 1.27531   | 0.299 |
| D E * | 0.6488428  | 1.058973  | 2.710994   | 1.704233  | -2.062151  | 1.877811  | 0.272 |
| D H * | 0.9553927  | 1.034956  | -1.106602  | 1.747933  | 2.061995   | 1.877811  | 0.272 |
| D O * | 1.333728   | 0.7235379 | -0.5728854 | 379.2563  | 1.906614   | 379.2576  | 0.996 |
| E G   | -0.5626757 | 0.6576773 | -0.5932163 | 0.486686  | 0.0305406  | 0.8181667 | 0.97  |
| E H * | -0.2007636 | 0.4431941 | -0.8322682 | 0.2779084 | 0.6315046  | 0.5234081 | 0.228 |
| E K   | 0.2869751  | 0.6177928 | -0.1005938 | 0.5911696 | 0.3875689  | 0.8596354 | 0.652 |
| E L   | 1.927633   | 1.630248  | -0.4267207 | 0.3959858 | 2.354354   | 1.677651  | 0.161 |
| E M   | 0.7488857  | 0.3550934 | -0.0974794 | 0.3840663 | 0.8463651  | 0.526735  | 0.108 |
| E R * | 1.98E-09   | 1.34507   | -2.539136  | 282.7516  | 2.539136   | 282.7565  | 0.993 |
| F G   | -0.5896345 | 1.166057  | -0.329005  | 0.476252  | -0.2606294 | 1.231933  | 0.832 |
| F I   | 0.0270565  | 1.540491  | -0.465274  | 0.4096866 | 0.4923304  | 1.594038  | 0.757 |
| F L   | -0.3352391 | 0.3998887 | 0.6438248  | 0.6678686 | -0.9790639 | 0.7796534 | 0.209 |
| F N   | 0.5789148  | 0.3855913 | 0.1759491  | 0.6778325 | 0.4029658  | 0.7926909 | 0.611 |



|     |           |           |            |           |            |           |       |
|-----|-----------|-----------|------------|-----------|------------|-----------|-------|
| G M | 0.5001679 | 0.5846488 | 1.375887   | 0.5817341 | -0.8757189 | 0.8179123 | 0.284 |
| G N | 0.8583061 | 1.038019  | 0.8336908  | 0.5473442 | 0.0246152  | 1.15357   | 0.983 |
| H M | 0.8532242 | 0.4907367 | 1.099849   | 0.3703592 | -0.2466247 | 0.6152092 | 0.689 |
| I Q | 0.2008759 | 0.7536675 | 0.4763967  | 0.6627766 | -0.2755208 | 1.004768  | 0.784 |
| N Q | 0.0067339 | 0.7679838 | -0.9634587 | 0.6560435 | 0.9701927  | 1.010046  | 0.337 |

A=Placebo;B=Chemo;C=TTD;D=TTD+Chemo;E=PD1;F=PDL1;G=CTLA4;H=PD1+Chemo;I=PDL1+Chemo;J=CTLA4+Chemo;K=PD1+TTD;L=PDL1+TTD;M=PD1+CTLA4;N=PDL1+CTLA4;O=PDL1+TTD+Chemo;P=PD1+CTLA4+Chemo;Q=PD1+CTLA4+Chemo;R=PD1+PDL1

### B. Grade 3-4 treatment-related PAEs

| Side  | Direct     |           | Indirect   |           | Difference |           |       |
|-------|------------|-----------|------------|-----------|------------|-----------|-------|
|       | Coef.      | Std. Err. | Coef.      | Std. Err. | Coef.      | Std. Err. | P>z   |
| A C   | -1.324845  | 1.992432  | -0.3241157 | 0.4572346 | -1.000729  | 2.04422   | 0.624 |
| A E   | 0.8862845  | 0.3525741 | 0.7395543  | 0.4592968 | 0.1467302  | 0.5572676 | 0.792 |
| A F   | 0.4162884  | 0.4905191 | 1.102279   | 0.4543319 | -0.6859907 | 0.6686054 | 0.305 |
| A G   | 1.380599   | 0.9279708 | 0.3995141  | 0.5057231 | 0.9810844  | 1.056828  | 0.353 |
| A L   | -2.058336  | 1.993266  | 1.108224   | 0.5653927 | -3.16656   | 2.071786  | 0.126 |
| A M   | 1.994822   | 0.9914708 | 1.403974   | 0.3680524 | 0.5908482  | 1.041658  | 0.571 |
| A N   | 0.9838031  | 0.6691633 | 0.9190598  | 0.4635563 | 0.0647434  | 0.8127324 | 0.937 |
| B E   | 1.392618   | 0.2160784 | 0.5888849  | 0.3356992 | 0.8037326  | 0.4014469 | 0.045 |
| B F   | 1.224074   | 0.3521635 | 0.9071251  | 0.4619257 | 0.316949   | 0.5815754 | 0.586 |
| B G   | -0.0887231 | 0.7188002 | 1.39852    | 0.4792613 | -1.487243  | 0.8560343 | 0.082 |
| B H   | 0.454459   | 0.2816811 | 1.338572   | 0.4341107 | -0.8841128 | 0.5332406 | 0.097 |
| B I * | 0.634496   | 0.2939356 | 2.244054   | 1.55231   | -1.609558  | 1.591487  | 0.312 |
| B J * | -0.1120233 | 0.7132097 | 0.8969898  | 426.975   | -1.009013  | 426.9754  | 0.998 |
| B K   | 1.860845   | 1.045408  | 1.421213   | 0.5582456 | 0.4396319  | 1.202306  | 0.715 |
| B M   | 1.384345   | 0.5114119 | 1.939901   | 0.3020511 | -0.5555559 | 0.6068405 | 0.36  |
| B N   | 1.496662   | 0.5769313 | 1.100807   | 0.4680908 | 0.3958541  | 0.7824928 | 0.613 |
| B P * | 3.019133   | 1.445543  | -1.107214  | 503.8854  | 4.126348   | 503.8913  | 0.993 |
| B Q   | 0.7353738  | 0.6871241 | 0.8438068  | 0.7308009 | -0.108433  | 1.026038  | 0.916 |
| C E   | 0.9702267  | 0.5180412 | 1.441142   | 0.5139123 | -0.4709152 | 0.7297065 | 0.519 |
| C F   | 0.9773775  | 1.038652  | 1.197949   | 0.4715778 | -0.2205714 | 1.14507   | 0.847 |
| C K   | 1.877244   | 0.7004205 | 1.276645   | 0.6946491 | 0.6005992  | 0.9864722 | 0.543 |
| C L   | 0.8775048  | 0.5686131 | 2.193536   | 0.9195288 | -1.316032  | 1.090851  | 0.228 |
| C M   | 2.750397   | 1.02898   | 1.67305    | 0.445033  | 1.077347   | 1.121095  | 0.337 |
| D E * | -0.0443002 | 0.9965853 | 2.560137   | 1.489477  | -2.604438  | 1.792212  | 0.146 |
| D H * | 0.7322343  | 0.8619118 | -1.872165  | 1.723187  | 2.604399   | 1.792205  | 0.146 |
| D O * | 0.8268646  | 1.094457  | 0.0767284  | 659.2438  | 0.7501362  | 659.2458  | 0.999 |
| E G   | 0.0338664  | 0.6651881 | -0.3417612 | 0.4911897 | 0.3756276  | 0.8268886 | 0.65  |
| E H * | 0.0447778  | 0.3793749 | -0.7232436 | 0.2996871 | 0.7680214  | 0.4826202 | 0.112 |
| E K   | 0.0277335  | 0.6492544 | 0.7558426  | 0.6967872 | -0.7281091 | 0.9672495 | 0.452 |
| E L   | 1.927636   | 1.508832  | -0.1929496 | 0.5289984 | 2.120585   | 1.598879  | 0.185 |

|     |            |           |            |           |            |           |       |
|-----|------------|-----------|------------|-----------|------------|-----------|-------|
| EM  | 0.7494222  | 0.2788795 | 0.4189212  | 0.3868684 | 0.330501   | 0.4822832 | 0.493 |
| ER* | -1.76877   | 1.611818  | -1.844221  | 354.7629  | 0.0754514  | 354.7627  | 1     |
| FG  | -0.5690482 | 1.211877  | -0.102886  | 0.4804909 | -0.4661622 | 1.285359  | 0.717 |
| FI  | 0.0270554  | 1.410375  | -0.4422017 | 0.4054303 | 0.4692571  | 1.467492  | 0.749 |
| FL  | -0.0555487 | 0.6633936 | 0.2732227  | 0.7579703 | -0.3287713 | 1.007189  | 0.744 |
| FN  | 0.0926433  | 0.3518215 | 0.3826795  | 0.7004705 | -0.2900362 | 0.7998512 | 0.717 |
| GM  | 0.6480145  | 0.5789854 | 1.037267   | 0.5737054 | -0.3892527 | 0.8058276 | 0.629 |
| GN  | 1.038132   | 0.9883208 | 0.113695   | 0.5402264 | 0.9244367  | 1.103329  | 0.402 |
| HM  | 0.9924085  | 0.4369164 | 1.109575   | 0.3503134 | -0.1171668 | 0.5607046 | 0.834 |
| IQ  | -0.2580076 | 0.7583323 | 0.3768441  | 0.6997614 | -0.6348517 | 1.023071  | 0.535 |
| NQ  | -0.2809474 | 0.7548941 | -0.6442561 | 0.7028094 | 0.3633087  | 1.03141   | 0.725 |

A=Placebo;B=Chemo;C=TTD;D=TTD+Chemo;E=PD1;F=PDL1;G=CTLA4;H=PD1+Chemo;I=PDL1+Chemo;J=CTLA4+Chemo;K=PD1+TTD;L=PDL1+TTD;M=PD1+CTLA4;N=PDL1+CTLA4;O=PDL1+TTD+Chemo;P=PD1+CTLA4+Chemo;Q=PD1+CTLA4+Chemo;R=PD1+PDL1

### C. Fatal PAEs

| Side | Direct     |           | Indirect   |           | Difference |           |       |
|------|------------|-----------|------------|-----------|------------|-----------|-------|
|      | Coef.      | Std. Err. | Coef.      | Std. Err. | Coef.      | Std. Err. | P>z   |
| AC   | -1.313766  | 1.992429  | -0.5899548 | 0.67775   | -0.723811  | 2.104471  | 0.731 |
| AE   | -0.0722055 | 0.5032663 | -0.3655092 | 0.6747226 | 0.2933037  | 0.8467655 | 0.729 |
| AF   | 0.4217479  | 0.6990044 | -0.4501525 | 0.6406436 | 0.8719004  | 0.9411745 | 0.354 |
| AG   | -0.0230648 | 1.067937  | 0.2611955  | 0.7327438 | -0.2842603 | 1.295146  | 0.826 |
| AL   | -2.052327  | 1.993262  | -0.6039948 | 0.708136  | -1.448332  | 2.115236  | 0.494 |
| AM   | -1.250626  | 1.580843  | -0.1613754 | 0.6087592 | -1.08925   | 1.690128  | 0.519 |
| AN   | -0.6910186 | 1.411374  | 0.7971868  | 0.6588737 | -1.488205  | 1.557587  | 0.339 |
| BE   | 0.387194   | 0.2950448 | 0.3481841  | 0.5174496 | 0.0390099  | 0.5956504 | 0.948 |
| BF   | 0.1846515  | 0.5338067 | 0.9579576  | 0.6390116 | -0.7733061 | 0.8326357 | 0.353 |
| BG   | 0.6183867  | 1.149679  | 0.7609046  | 0.6623552 | -0.1425179 | 1.327028  | 0.914 |
| BH   | 0.1752549  | 0.3905891 | 0.1747934  | 0.7791225 | 0.0004616  | 0.8631088 | 1     |
| BI*  | 0.1105618  | 0.4966773 | 0.8490498  | 2.804673  | -0.738488  | 2.84831   | 0.795 |
| BJ*  | 0.004465   | 0.998843  | 1.108429   | 659.5241  | -1.103964  | 659.5249  | 0.999 |
| BK   | -0.0224684 | 1.408677  | 0.0243288  | 0.8617747 | -0.0467972 | 1.651371  | 0.977 |
| BM   | 0.23897    | 0.7829717 | 0.2641855  | 0.5935227 | -0.0252155 | 0.9825041 | 0.98  |
| BN   | 1.463503   | 0.6584111 | 0.4056248  | 0.90343   | 1.057878   | 1.155873  | 0.36  |
| BP*  | 1.073223   | 1.631265  | 0.8192242  | 1196.263  | 0.2539988  | 1196.266  | 1     |
| BQ   | -0.3513357 | 1.41144   | 0.9454112  | 1.792577  | -1.296747  | 2.281557  | 0.57  |
| CE   | -0.0260757 | 0.9988999 | 0.7281353  | 0.6838503 | -0.754211  | 1.210559  | 0.533 |
| CF   | 1.180922   | 1.041336  | 0.3673615  | 0.6878714 | 0.8135602  | 1.239536  | 0.512 |
| CK   | -0.0116269 | 0.893636  | 0.3368637  | 1.137205  | -0.3484907 | 1.446313  | 0.81  |
| CL   | 0.0459178  | 0.6406637 | -0.5695761 | 1.142798  | 0.6154939  | 1.310134  | 0.639 |
| CM   | -0.0221411 | 1.999077  | 0.4167311  | 0.7322418 | -0.4388723 | 2.128964  | 0.837 |
| DE*  | 1.054457   | 1.63091   | 1.703893   | 2.45763   | -0.6494356 | 2.456315  | 0.791 |
| DH*  | 1.137553   | 1.630822  | 0.4880843  | 2.457808  | 0.6494685  | 2.456317  | 0.791 |

|     |            |           |            |           |            |           |       |
|-----|------------|-----------|------------|-----------|------------|-----------|-------|
| DO* | 0.0012677  | 1.41349   | 2.747114   | 1418.217  | -2.745846  | 1418.218  | 0.998 |
| EG  | 0.0412268  | 0.9991945 | 0.4894226  | 0.6792818 | -0.4481958 | 1.208228  | 0.711 |
| EH* | -0.3686472 | 0.7430144 | -0.1365525 | 0.4708325 | -0.2320947 | 0.8744393 | 0.791 |
| EK  | -0.1467589 | 1.148542  | -0.51047   | 0.9322215 | 0.3637111  | 1.478927  | 0.806 |
| EL  | -0.0182654 | 1.997715  | -0.6481177 | 0.6446296 | 0.6298524  | 2.099146  | 0.764 |
| EM  | 0.0510645  | 0.638432  | -0.3132137 | 0.6687155 | 0.3642782  | 0.924531  | 0.694 |
| ER* | -0.6701577 | 1.982748  | 0.4651178  | 505.7908  | -1.135275  | 505.7946  | 0.998 |
| FG  | 0.3301429  | 1.409407  | 0.1956032  | 0.7108016 | 0.1345398  | 1.578576  | 0.932 |
| FI  | 0.0269472  | 1.997302  | -0.4126535 | 0.6591823 | 0.4396007  | 2.103269  | 0.834 |
| FL  | -1.10889   | 0.6629583 | 0.2330469  | 1.018707  | -1.341937  | 1.206706  | 0.266 |
| FN  | 0.8390319  | 0.6490708 | -0.0149319 | 1.022723  | 0.8539638  | 1.246994  | 0.493 |
| GM  | -0.5873831 | 0.9955775 | -0.3877033 | 0.836998  | -0.1996799 | 1.30074   | 0.878 |
| GN  | -0.8621521 | 1.41029   | 0.7688028  | 0.8146771 | -1.630955  | 1.628767  | 0.317 |
| HM  | -0.00563   | 1.150823  | 0.1046546  | 0.620435  | -0.1102845 | 1.307413  | 0.933 |
| IQ  | 0.0120113  | 1.998498  | 0.0118692  | 1.443879  | 0.0001422  | 2.46552   | 1     |
| NQ  | 0.006689   | 1.996653  | -1.417096  | 1.414902  | 1.423785   | 2.447155  | 0.561 |

A=Placebo;B=Chemo;C=TTD;D=TTD+Chemo;E=PD1;F=PDL1;G=CTLA4;H=PD1+Chemo;I=PDL1+Chemo;J=CTLA4+Chemo;K=PD1+TTD;L=PDL1+TTD;M=PD1+CTLA4;N=PDL1+CTLA4;O=PDL1+TTD+Chemo;P=PD1+CTLA4+Chemo;Q=PD1+CTLA4+Chemo;R=PD1+PDL1

**Figure S1. Flowchart of Study Selection**

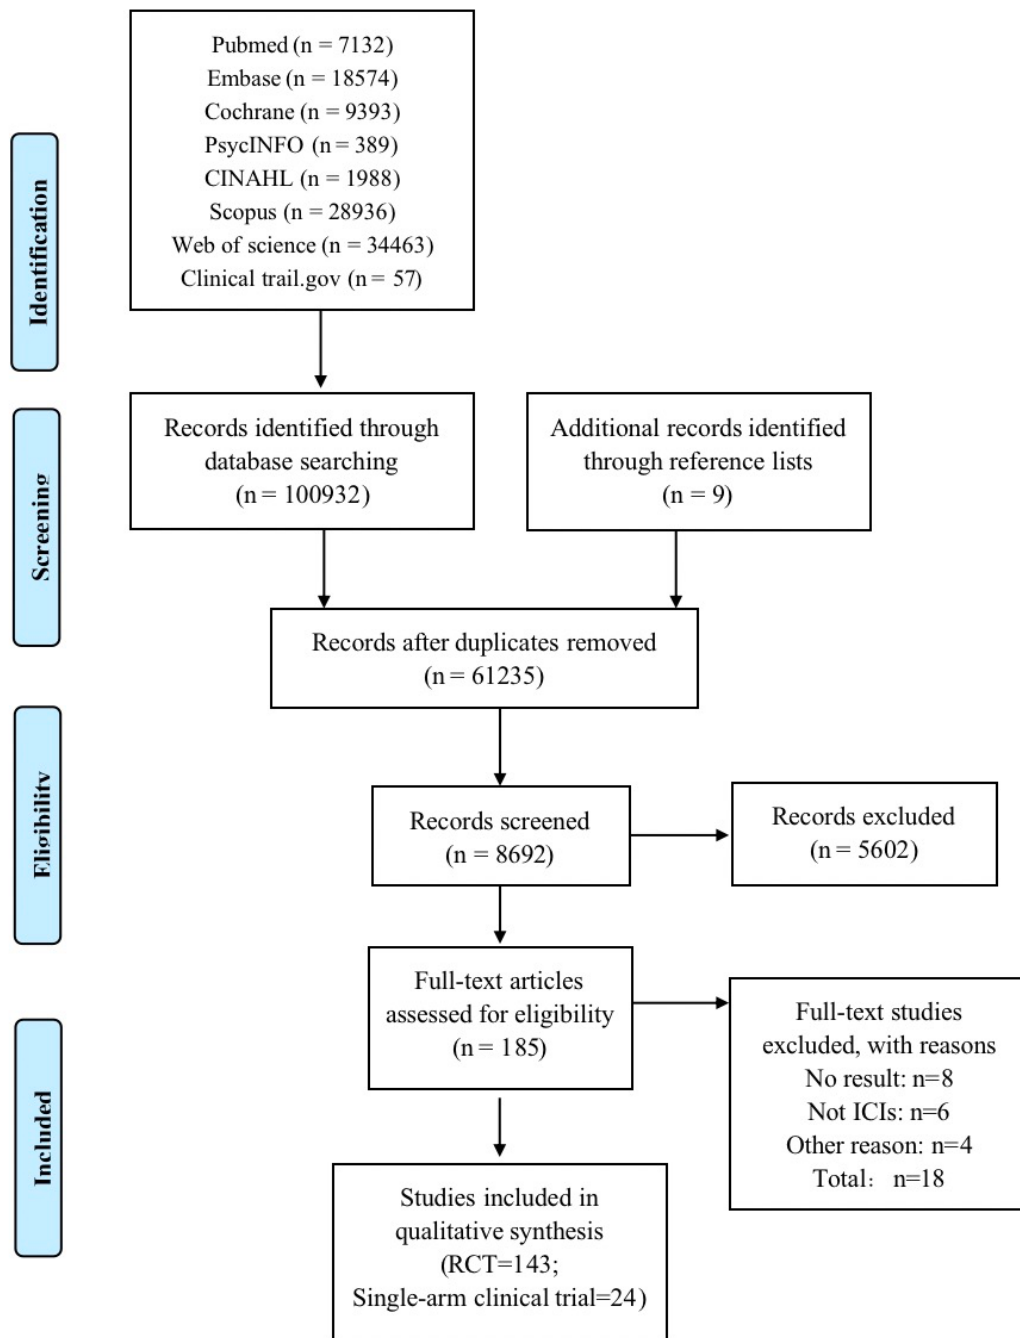

**Figure S2. Risk of Bias Assessment for Studies**

| Unique ID | Study ID       | Randomization process | Deviations from intended interventions | Missing outcome data | Measurement of the outcome | Selection of the reported result | Overall |
|-----------|----------------|-----------------------|----------------------------------------|----------------------|----------------------------|----------------------------------|---------|
| 1         | Ascierto, 2020 | +                     | +                                      | +                    | +                          | +                                | +       |
| 2         | IMvigor010     | +                     | +                                      | ?                    | +                          | +                                | !       |
| 3         | IMpassion130   | +                     | +                                      | ?                    | +                          | +                                | !       |
| 4         | ATTRACTION-2   | +                     | +                                      | ?                    | +                          | +                                | !       |
| 5         | CheckMate 9ER  | +                     | +                                      | ?                    | ?                          | +                                | !       |
| 6         | KEYNOTE-355    | +                     | +                                      | ?                    | +                          | +                                | ?       |
| 7         | KEYNOTE-240    | +                     | +                                      | ?                    | +                          | +                                | !       |
| 8         | KEYNOTE-061    | +                     | +                                      | +                    | +                          | +                                | +       |
| 9         | IMspire150     | +                     | +                                      | ?                    | +                          | +                                | !       |
| 10        | IMpower110     | +                     | +                                      | +                    | +                          | +                                | +       |
| 11        | CheckMate 067  | +                     | +                                      | ?                    | +                          | +                                | !       |
| 12        | NCT03099382    | +                     | +                                      | ?                    | +                          | +                                | !       |
| 13        | CheckMate 649  | +                     | +                                      | +                    | +                          | +                                | +       |
| 14        | IMpower131     | +                     | +                                      | ?                    | +                          | +                                | !       |
| 15        | KEYNOTE-204    | +                     | +                                      | +                    | +                          | +                                | +       |
| 16        | CheckMate 078  | +                     | +                                      | ?                    | ?                          | +                                | !       |

 Low risk  
 Some concerns  
 High risk

|    |               |   |   |   |   |   |   |
|----|---------------|---|---|---|---|---|---|
| 17 | IMpassion131  | + | + | + | + | + | + |
| 18 | IMpassion031  | + | ? | + | ? | + | ! |
| 19 | IMagyn050     | + | + | + | + | + | + |
| 20 | CheckMate 025 | + | + | ? | ? | + | ! |
| 21 | KEYNOTE-045   | + | + | ? | + | + | ! |
| 22 | PACIFIC       | + | + | ? | + | + | + |
| 23 | DANUBE        | + | ? | + | + | ? | ! |
| 24 | KEYNOTE-426   | + | + | ? | ? | + | ! |
| 25 | KEYNOTE-361   | + | ? | + | + | + | ! |
| 26 | CheckMate 143 | + | + | ? | ? | + | ! |
| 27 | CheckMate 9LA | ? | + | + | + | + | ! |
| 28 | MYSTIC        | + | ! | ? | ? | + | ! |
| 29 | KEYNOTE-604   | + | + | + | + | + | + |
| 30 | Empwer-1ung 1 | + | ? | + | ? | + | ! |
| 31 | KEYNOTE-062   | + | + | + | + | + | + |
| 32 | NCT03117049   | + | + | + | + | + | + |
| 33 | KEYNOTE-590   | + | + | + | + | + | + |
| 34 | KEYNOTE-119   | + | ! | + | ? | + | ! |
| 35 | CAPTAIN-1st   | + | + | ? | + | + | ! |
| 36 | ORIENT-12     | + | + | + | + | + | + |
| 37 | Camel         | + | ? | + | ? | + | ! |
| 38 | CheckMate 141 | + | + | ? | ? | + | ! |
| 39 | CheckMate 017 | + | + | ? | ? | + | ! |
| 40 | CheckMate 057 | + | + | ? | ? | + | ! |
| 41 | KEYNOTE-024   | + | + | ? | ? | + | + |
| 42 | KEYNOTE-006   | + | ! | ? | ? | + | ! |
| 43 | CheckMate 026 | + | + | ? | ? | + | ! |

|                            |   |   |   |   |   |   |
|----------------------------|---|---|---|---|---|---|
| 44 OAK                     | + | + | ? | ? | + | ! |
| 45 KEYNOTE-407             | + | + | + | + | + | ! |
| 46 KEYNOTE-042             | + | " | ? | ? | + | " |
| 47 CASPIAN                 | + | ? | ? | ? | + | ! |
| 48 CheckMate 227           | + | + | ? | ? | + | ! |
| 49 KEYNOTE-189             | + | + | ? | + | + | ! |
| 50 EORTC 18071             | + | + | ? | + | + | ! |
| 51 IMblaze370              | + | + | ? | ? | + | ! |
| 52 KEYNOTE-040             | + | + | + | ? | + | + |
| 53 KEYNOTE-054             | + | + | ? | + | + | ! |
| 54 KEYNOTE-252             | + | + | + | + | + | + |
| 55 CA184-156               | + | + | ? | + | + | ! |
| 56 IMpower150              | + | + | ? | ? | + | ! |
| 57 KEYNOTE-181             | + | + | ? | ? | + | ! |
| 58 IMbrave-150             | + | + | ? | ? | + | ! |
| 59 CAURAL                  | + | + | ? | ? | + | ! |
| 60 IMpower133              | + | + | + | + | + | + |
| 61 CheckMate 451           | + | + | ? | + | + | ! |
| 62 KEYNOTE-042 China Study | + | " | ? | ? | + | " |
| 63 IMspire170              | + | ? | + | ? | + | ! |
| 64 IMvigor211              | + | " | ? | ? | + | " |
| 65 JAVELIN Lung 200        | + | + | ? | ? | + | ! |
| 66 KEYNOTE-048             | + | ? | ? | ? | + | ! |

|                              |   |   |   |   |   |   |
|------------------------------|---|---|---|---|---|---|
| 67 CheckMate 274             | + | + | ? | + | + | ! |
| 68 CONFIRM                   | + | + | + | + | + | + |
| 69 KEYNOTE-598               | + | + | + | + | + | + |
| 70 KEYNOTE-185               | + | ? | ? | ? | + | ! |
| 71 NINJA                     | + | ? | ? | ? | + | ! |
| 72 NCT03594747               | + | ? | ? | ? | + | ! |
| 73 CheckMate 066             | + | + | + | + | + | ! |
| 74 CA184-104                 | + | + | ? | + | + | ! |
| 75 KEYNOTE-522               | + | + | + | + | + | + |
| 76 ARCTIC                    | + | ? | ? | ? | + | ! |
| 77 NCT03607539               | + | + | + | + | + | + |
| 78 CheckMate 037             | + | + | ? | + | + | ! |
| 79 EAGLE                     | + | + | ? | ? | + | ! |
| 80 JAVELIN OVARIAN 200       | + | " | + | ? | + | " |
| 81 IMmotion151               | + | + | ? | ? | + | ! |
| 82 CA184-095                 | + | + | ? | + | + | ! |
| 83 CA184-024                 | + | + | ? | + | + | ! |
| 84 CheckMate 214             | + | + | + | ? | " | " |
| 85 IMpower130                | + | + | ? | ? | + | + |
| 86 CheckMate 743             | + | " | ? | ? | + | " |
| 87 JAVELIN HEAD AND NECK 100 | + | ? | ? | + | + | ! |
| 88 JAVELIN Gastric 100       | + | " | + | ? | + | " |
| 89 ATTRACTION-3              | + | + | ? | + | + | ! |



|                        |   |   |   |   |   |   |
|------------------------|---|---|---|---|---|---|
| 90 KEYNOTE-061         | + | + | ? | ? | + | ! |
| 91 KEYNOTE-564         | + | ? | + | + | + | ! |
| 92 KEYNOTE-183         | + | ? | + | ? | + | ! |
| 93 NCT02785952         | + | ? | ? | ? | + | ! |
| 94 KEYNOTE-581         | + | + | + | ? | + | ! |
| 95 RATIONALE 304       | + | + | + | ? | + | ! |
| 96 JAVELIN OVARIAN 100 | + | ? | + | ? | + | ! |
| 97 CheckMate 331       | + | + | ? | ? | + | ! |
| 98 KEYNOTE-672         | + | + | + | + | ? | ! |
| 99 KEYNOTE-669         | + | + | + | ? | ? | ! |
| 100 NCT02279732        | + | + | + | + | + | + |
| 101 KEYNOTE-122        | + | ? | + | ? | + | ! |
| 102 KEYNOTE-033        | + | ? | + | ? | + | ! |
| 103 CheckMate 459      | + | ? | + | ? | ? | ! |
| 104 IMbassador250      | + | ? | + | ? | + | ! |
| 105 Peters, 2021       | + | + | + | + | + | + |
| 106 Scherpereel, 2019  | + | + | + | + | + | + |
| 107 Voss, 2022         | + | ? | + | + | + | ! |
| 108 Loibl, 2019        | + | + | + | + | + | + |
| 109 McDermott, 2018    | + | ? | + | + | + | ! |
| 110 Zhou, 2023         | + | ? | + | + | + | ! |
| 111 Johnson, 2023      | + | ? | + | + | + | + |
| 112 Forde, 2022        | + | + | + | + | + | + |

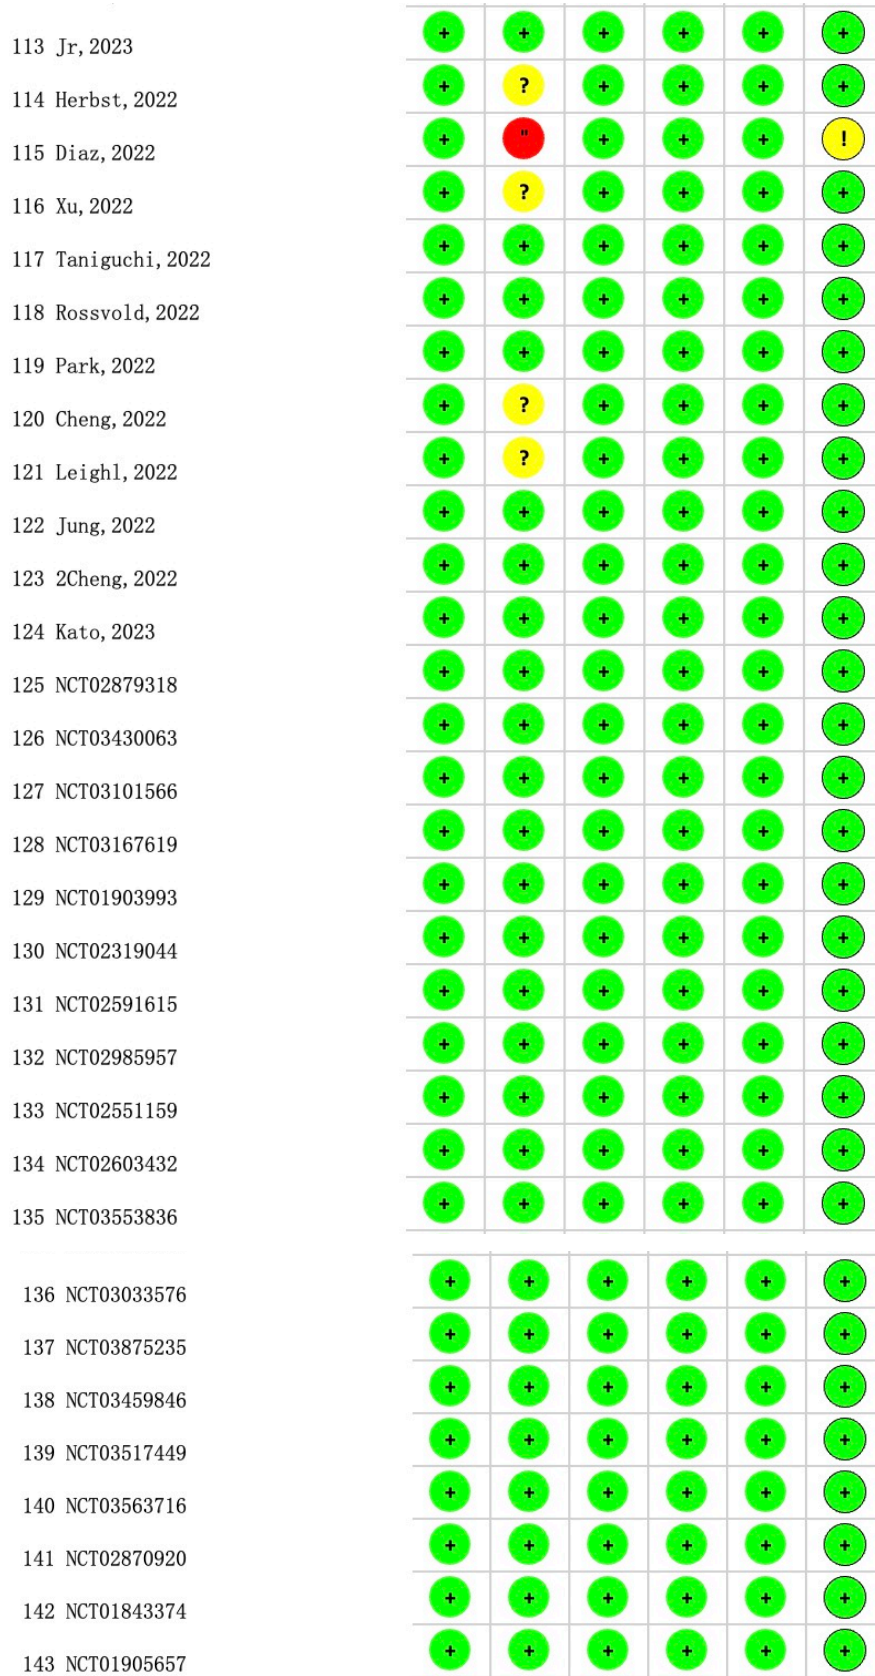

**Figure S3. Comparison-adjusted funnel plots for (A)all-grade treatment-related PAEs,(B)grade 3-4 treatment-related PAEs,(C)fatal PAEs,(D)all-grade treatment-related PAEs in tumors of different systems;(E) grade 3-4 treatment-related PAEs in tumors of different systems.**

A.

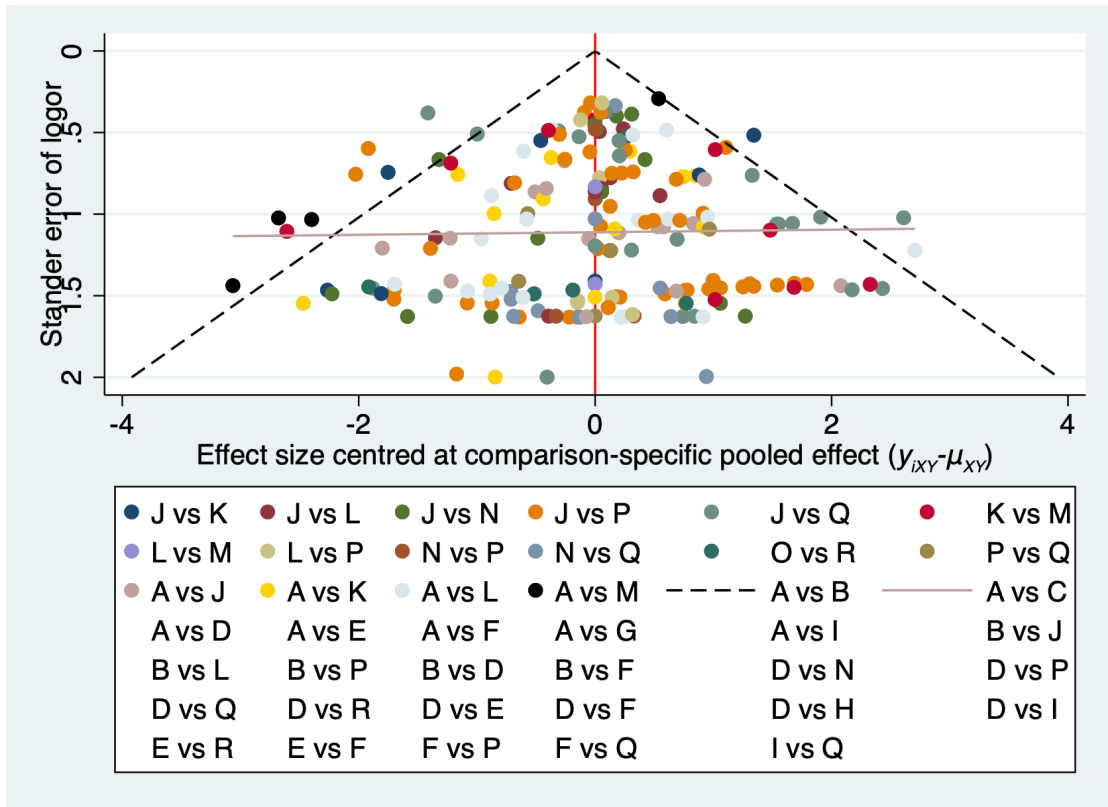

Egger test: P=0.113

A:Placebo; B:Chemo; C:TTD; D:TTD+Chemo; E:CTLA4; F:PDL1; G:PD1; H:CTLA4+Chemo;  
 I:PDL1+Chemo; J:PD1+Chemo; K:PDL1+TTD; L:PD1+TTD; M:PDL1+CTLA4;  
 N:PD1+CTLA4; O:PD1+PDL1; P:PDL1+TTD+Chemo; Q:PDL1+CTLA4+Chemo;  
 R:PD1+CTLA4+Chemo

B.

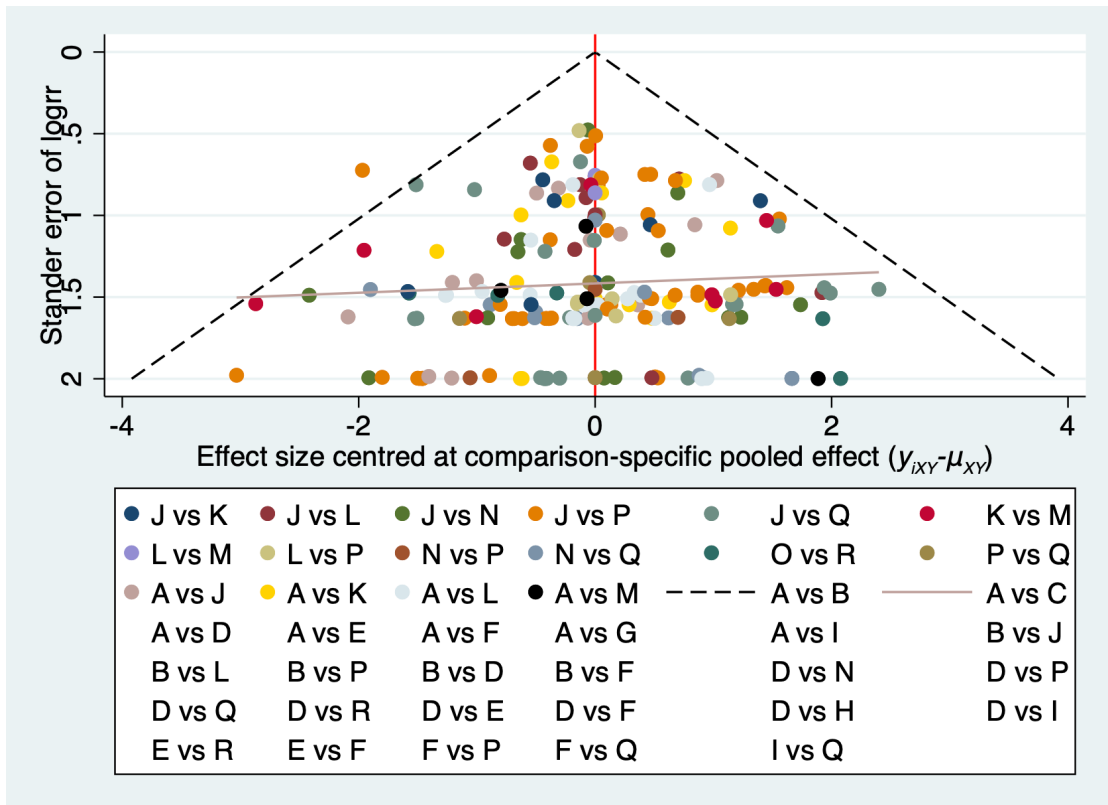

Egger test: P=0.544

A:Placebo; B:Chemo; C:TTD; D:TTD+Chemo; E:CTLA4; F:PDL1; G:PD1; H:CTLA4+Chemo;  
 I:PDL1+Chemo; J:PD1+Chemo; K:PDL1+TTD; L:PD1+TTD; M:PDL1+CTLA4;  
 N:PD1+CTLA4; O:PD1+PDL1; P:PDL1+TTD+Chemo; Q:PDL1+CTLA4+Chemo;  
 R:PD1+CTLA4+Chemo

C.

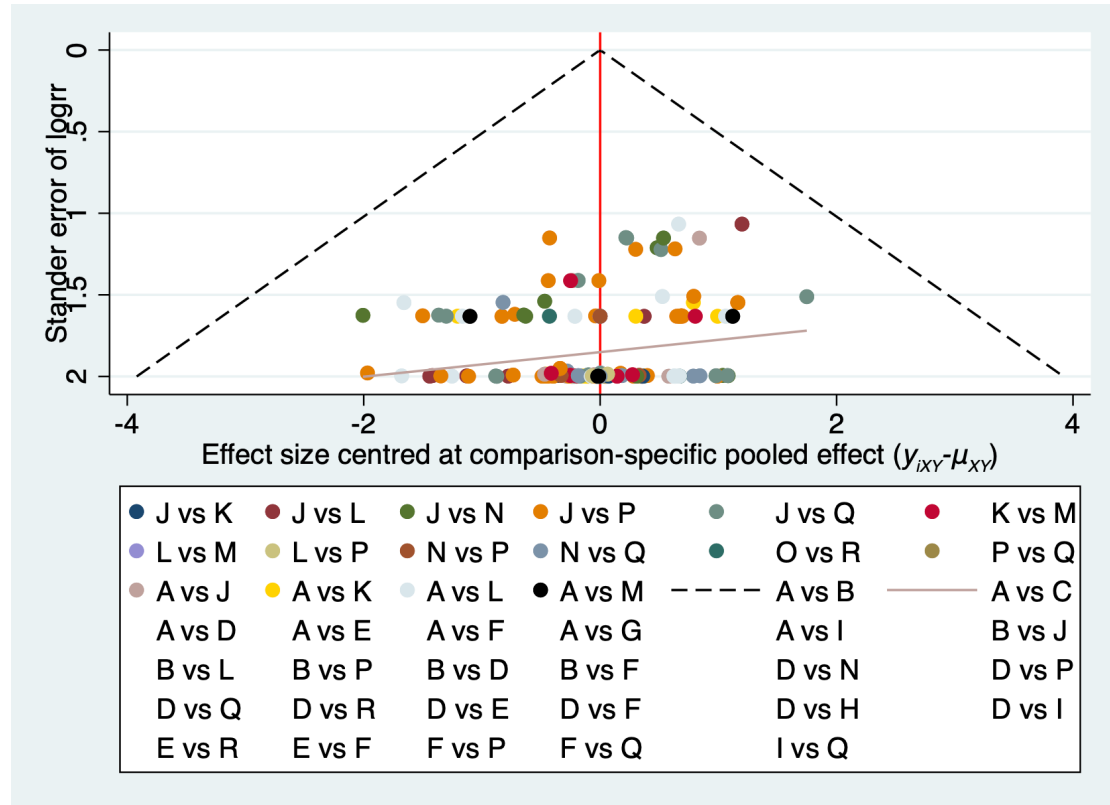

Egger test: P=0.000

A:Placebo; B:Chemo; C:TTD; D:TTD+Chemo; E:CTLA4; F:PDL1; G:PD1; H:CTLA4+Chemo;  
 I:PDL1+Chemo; J:PD1+Chemo; K:PDL1+TTD; L:PD1+TTD; M:PDL1+CTLA4;  
 N:PD1+CTLA4; O:PD1+PDL1; P:PDL1+TTD+Chemo; Q:PDL1+CTLA4+Chemo;  
 R:PD1+CTLA4+Chemo

D.

(a) digestive system cancer

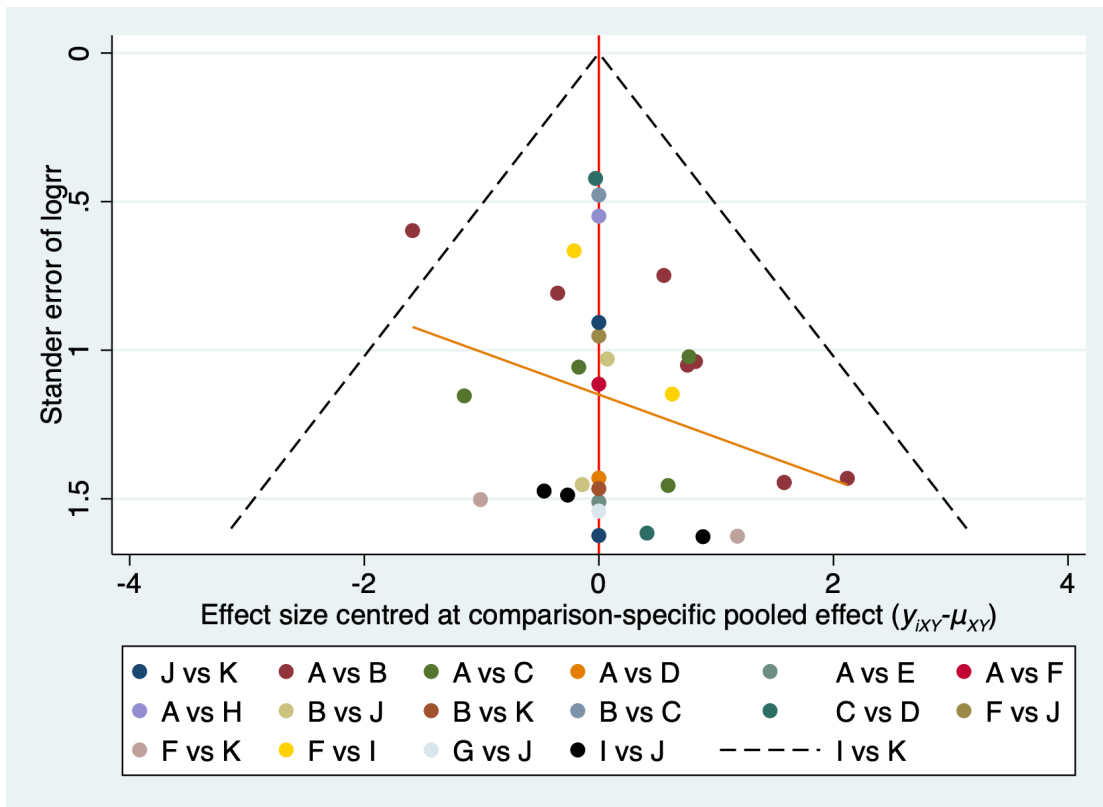

Egger test: P=0.081

A:Placebo; B:Chemo; C:TTD; D:PDL1; E:PD1; F:PD1+Chemo; G:PDL1+TTD; H:PD1+TTD; I:PDL1+CTLA4; J:PD1+CTLA4; K:PDL1+CTLA4+Chemo

(b) head and neck cancer

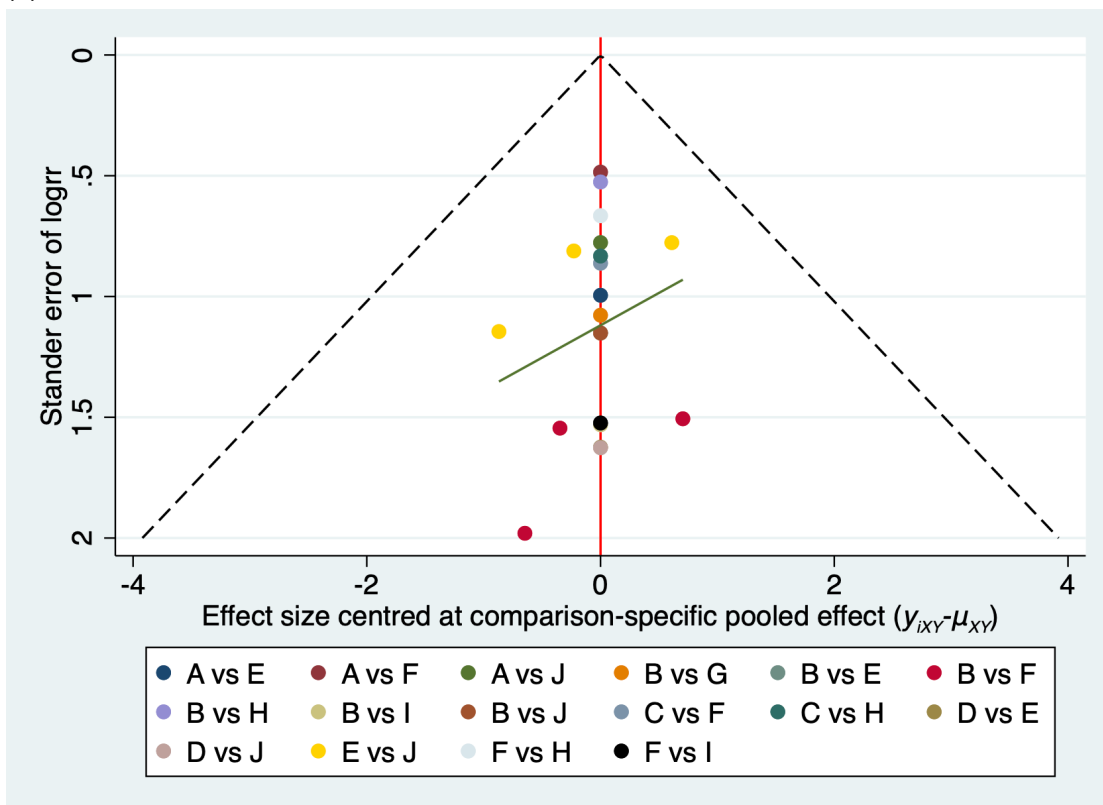

Egger test: P=0.165

A:Placebo; B:Chemo; C:TTD+Chemo; D:CTLA4; E:PDL1; F:PD1; G:PDL1+Chemo; H:PD1+Chemo; I:PD1+TTD; J:PDL1+CTLA4

(c) respiratory system cancer

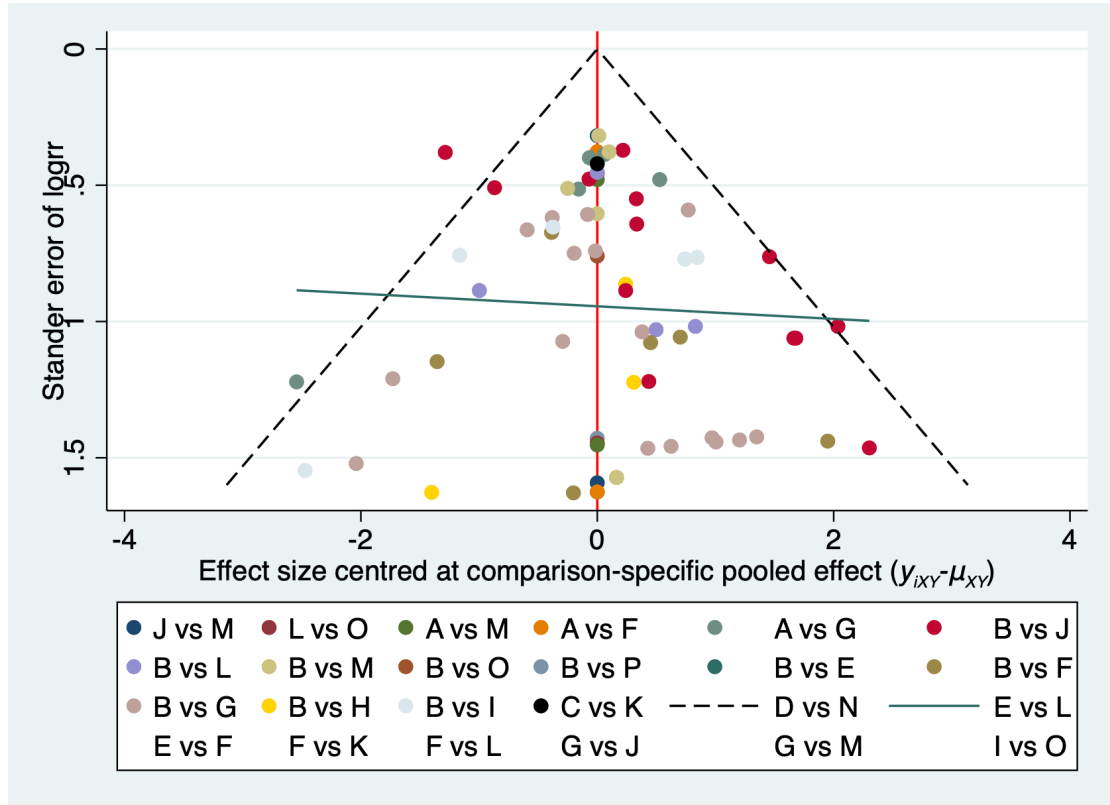

Egger test: P=0.000

A:Placebo; B:Chemo; C:TTD; D:TTD+Chemo; E:CTLA4; F:PDL1; G:PD1; H:CTLA4+Chemo;  
 I:PDL1+Chemo; J:PD1+Chemo; K:PDL1+TTD; L:PDL1+CTLA4; M:PD1+CTLA4;  
 N:PDL1+TTD+Chemo; O:PDL1+CTLA4+Chemo; P:PD1+CTLA4+Chemo

(d) skin cancer

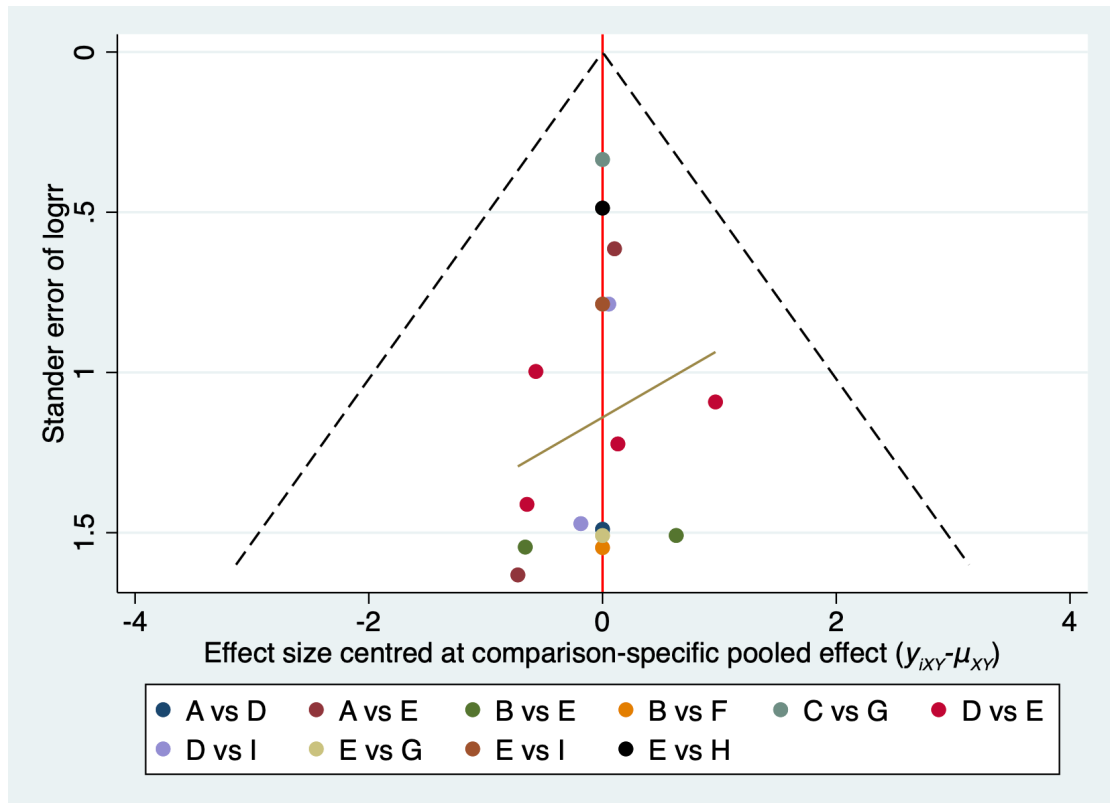

Egger test: P=0.219

A:Placebo; B:Chemo; C:TTD; D:CTLA4; E:PD1; F:CTLA4+Chemo; G:PDL1+TTD;  
H:PD1+TTD; I:PD1+CTLA4

(e) urogenital system cancer

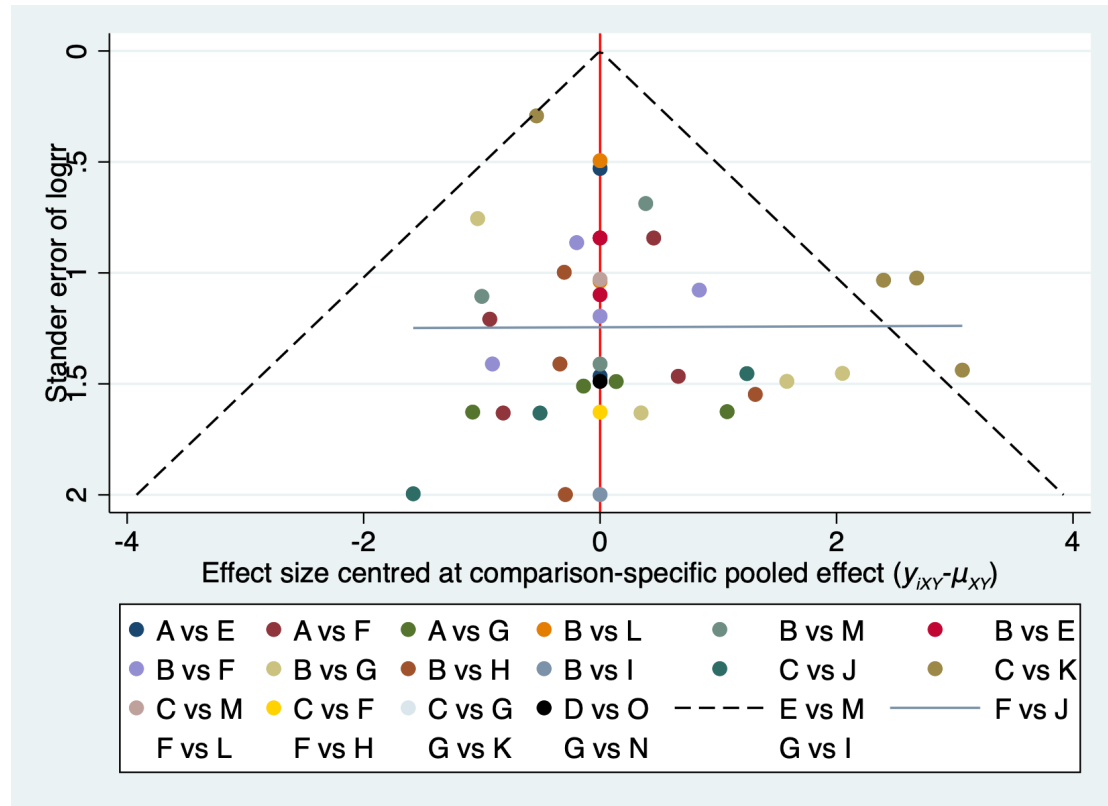

Egger test: P=0.050

A:Placebo; B:Chemo; C:TTD; D:TTD+Chemo; E:CTLA4; F:PDL1; G:PD1; H:CTLA4+Chemo;  
I:PDL1+Chemo; J:PD1+Chemo; K:PDL1+TTD; L:PD1+TTD; M:PDL1+CTLA4;  
N:PD1+CTLA4; O:PD1+PDL1; P:PDL1+TTD+Chemo; Q:PDL1+CTLA4+Chemo;  
R:PD1+CTLA4+Chemo

E.

(a) digestive system cancer

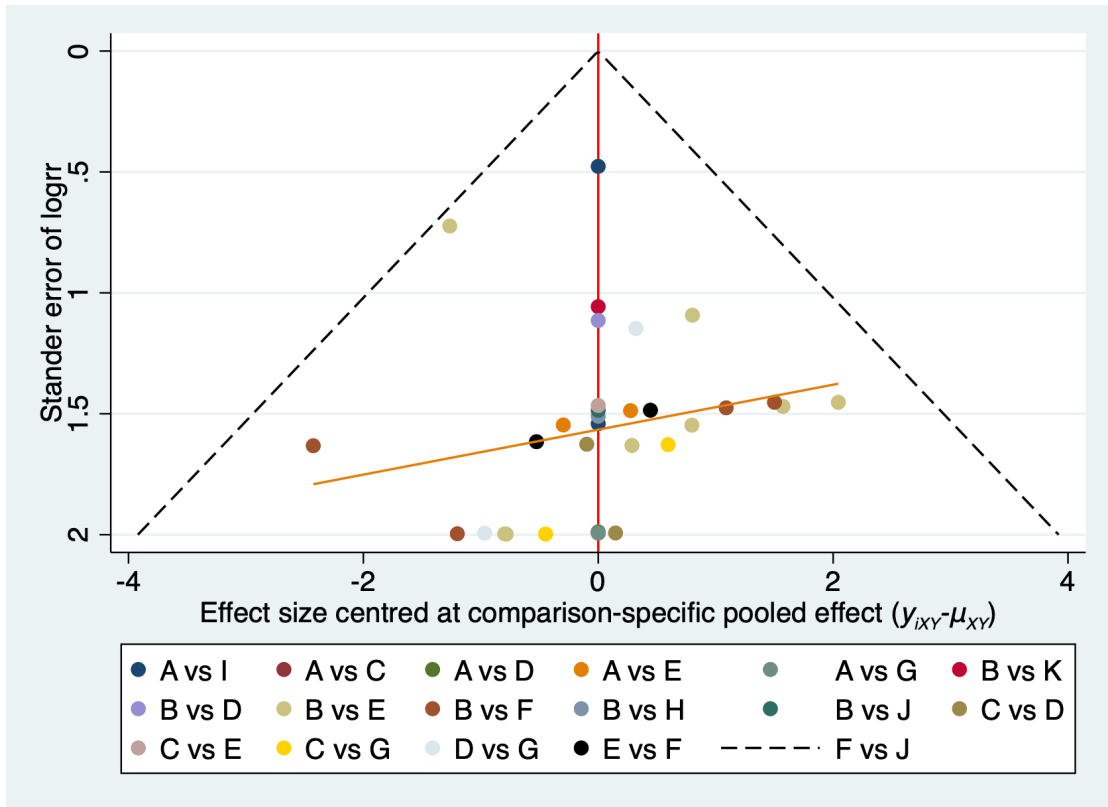

Egger test: P=0.254

A:Placebo; B:Chemo; C:TTD; D:PDL1; E:PD1; F:PD1+Chemo; G:PDL1+TTD; H:PD1+TTD; I:PDL1+CTLA4; J:PD1+CTLA4; K:PDL1+CTLA4+Chemo

(b) head and neck cancer

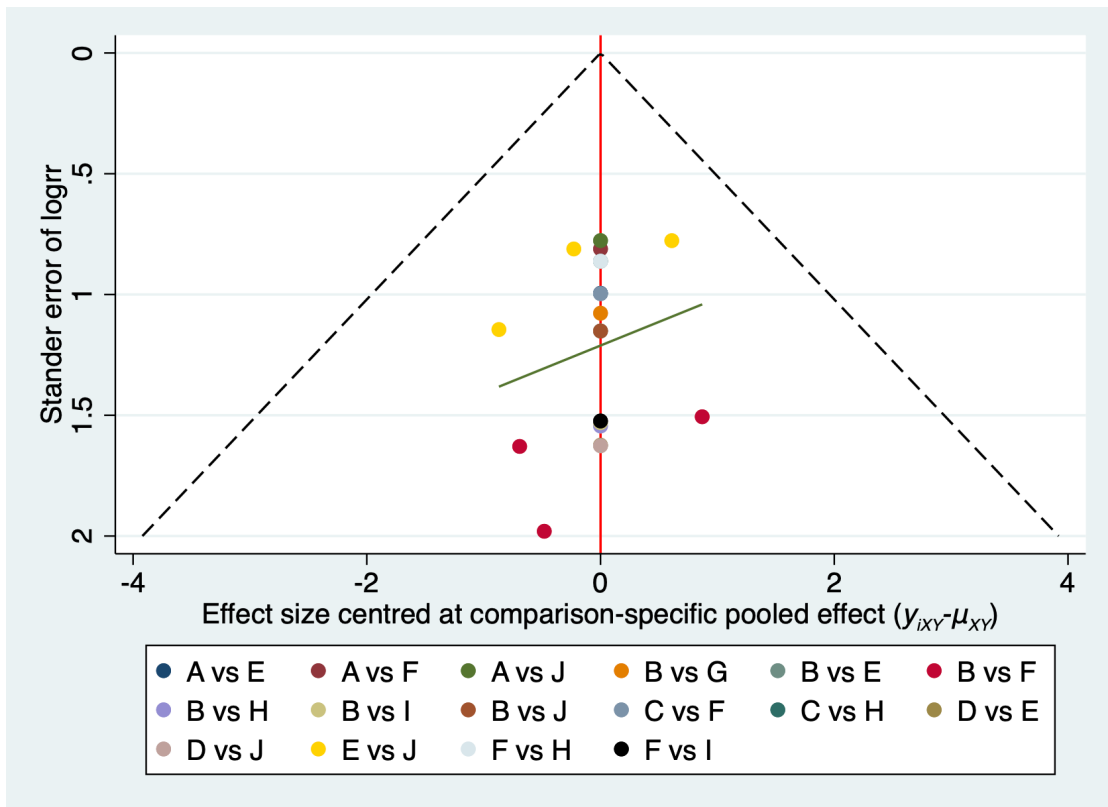

Egger test: P=0.154

A:Placebo; B:Chemo; C:TTD+Chemo; D:CTLA4; E:PDL1; F:PD1; G:PDL1+Chemo; H:PD1+Chemo; I:PD1+TTD; J:PDL1+CTLA4



(c) respiratory system cancer

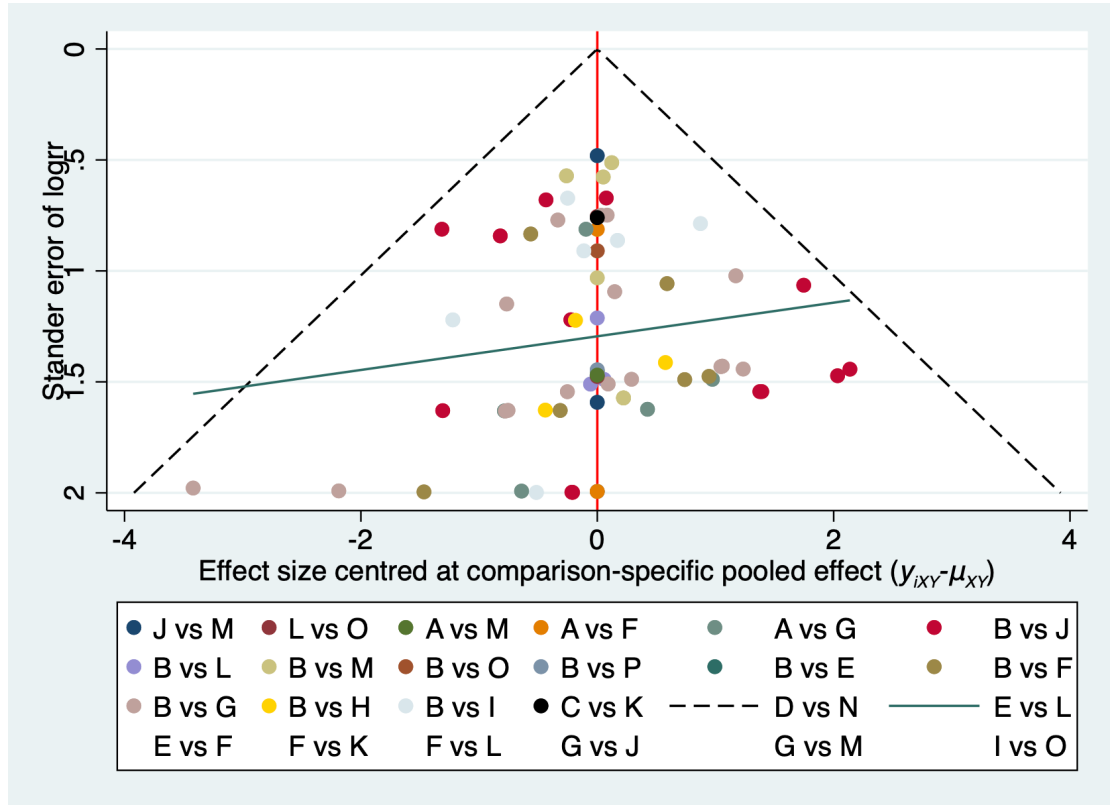

Egger test: P=0.060

A:Placebo; B:Chemo; C:TTD; D:TTD+Chemo; E:CTLA4; F:PDL1; G:PD1; H:CTLA4+Chemo;  
 I:PDL1+Chemo; J:PD1+Chemo; K:PDL1+TTD; L:PDL1+CTLA4; M:PD1+CTLA4;  
 N:PDL1+TTD+Chemo; O:PDL1+CTLA4+Chemo; P:PD1+CTLA4+Chemo

(d) skin cancer

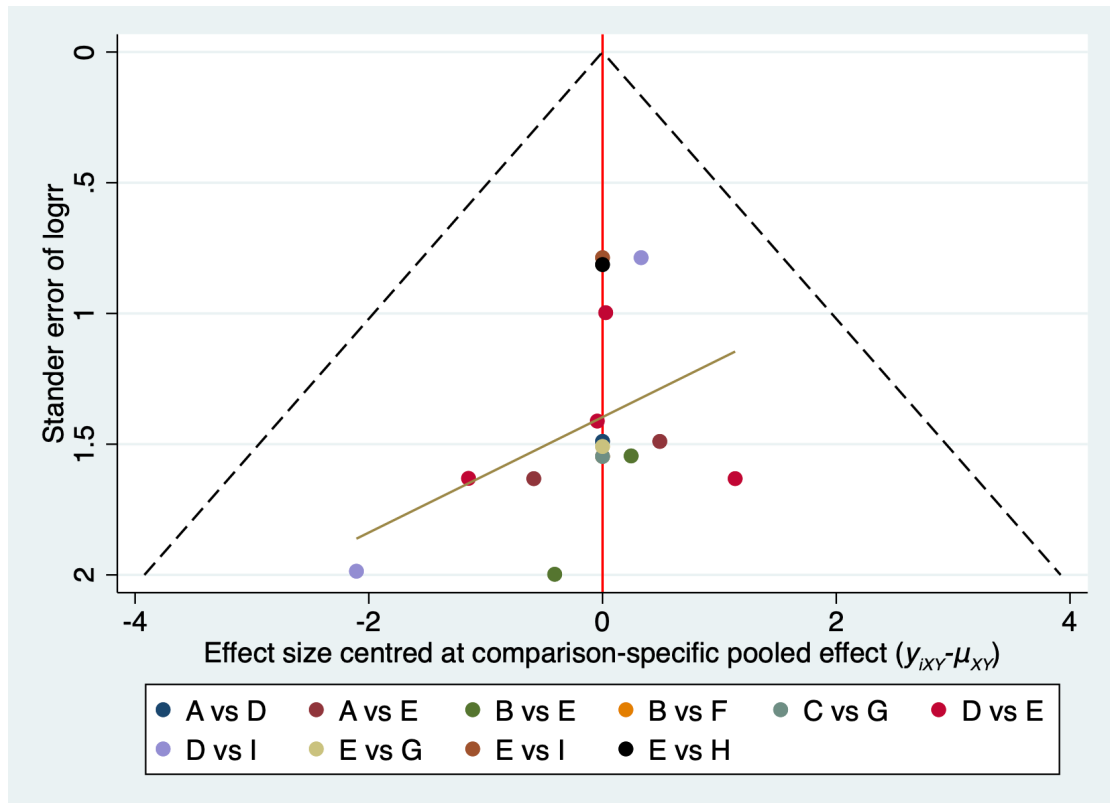

Egger test: P=0.837

A:Placebo; B:Chemo; C:TTD; D:CTLA4; E:PD1; F:CTLA4+Chemo; G:PDL1+TTD;  
H:PD1+TTD; I:PD1+CTLA4

(e) urogenital system cancer

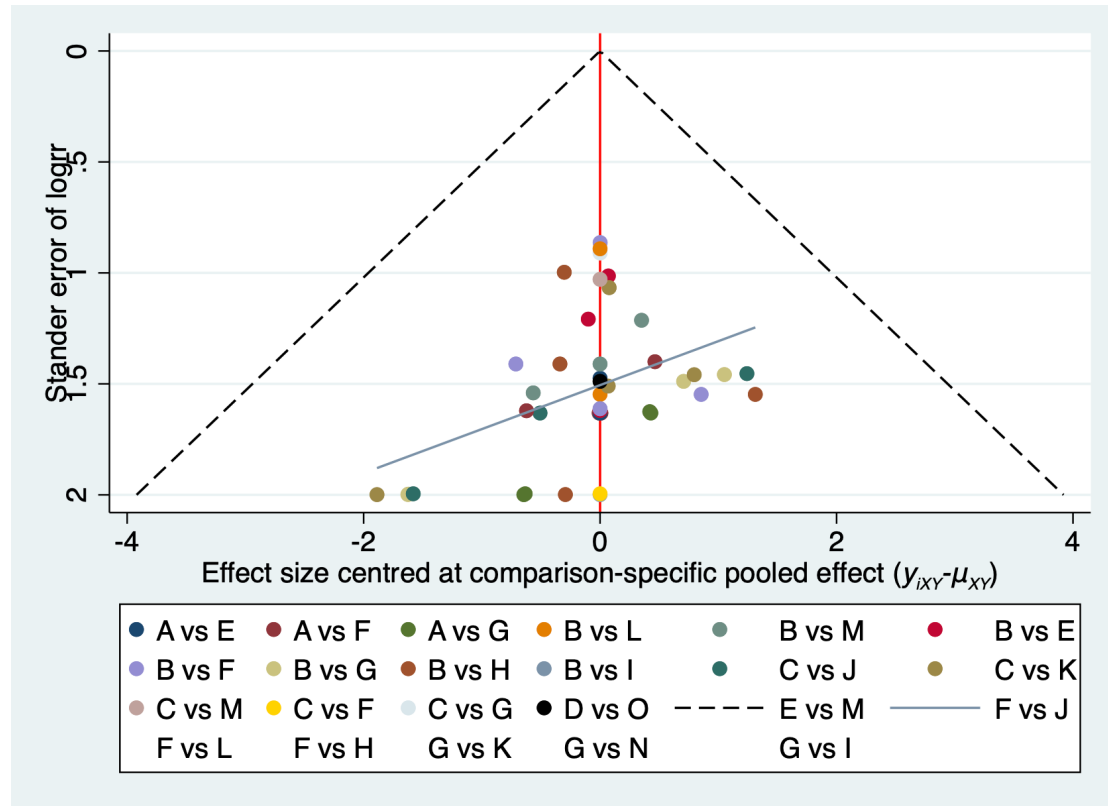

Egger test: P=0.663

A:Placebo; B:Chemo; C:TTD; D:TTD+Chemo; E:CTLA4; F:PDL1; G:PD1; H:CTLA4+Chemo;  
I:PDL1+Chemo; J:PD1+Chemo; K:PDL1+TTD; L:PD1+TTD; M:PDL1+CTLA4;  
N:PD1+CTLA4; O:PD1+PDL1; P:PDL1+TTD+Chemo; Q:PDL1+CTLA4+Chemo;  
R:PD1+CTLA4+Chemo

Abbreviations:PAEs, pulmonary adverse events; TTD, Targeted therapy drug; Chemo, Chemotherapy; PD-1, programmed cell death 1; PD-L1, programmed cell death ligand 1; CTLA4, cytotoxic T-lymphocyte antigen 4.

**Figure S4. Network plots for PAEs in patients with (A) respiratory system cancer, (B) urogenital system cancer, (C) skin cancer, (D) head and neck cancer, (E) digestive system cancer.**

**A. Respiratory system cancer**

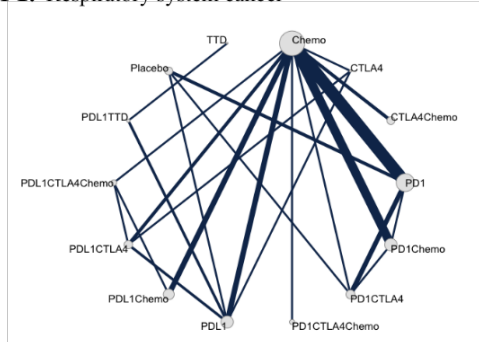

**B. Urogenital system cancer**

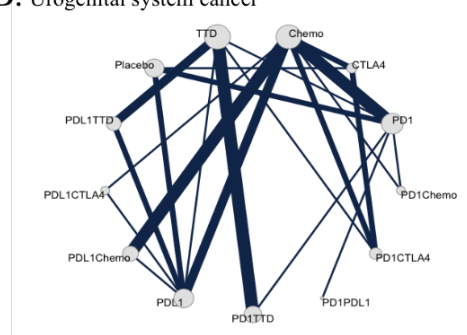

**C. Skin cancer**

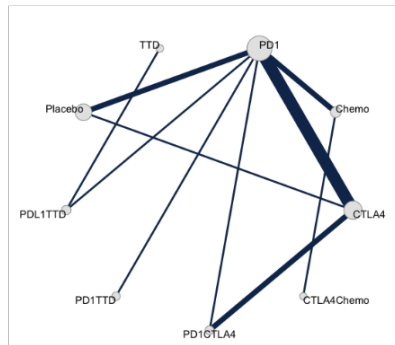

**D. Head and neck cancer**

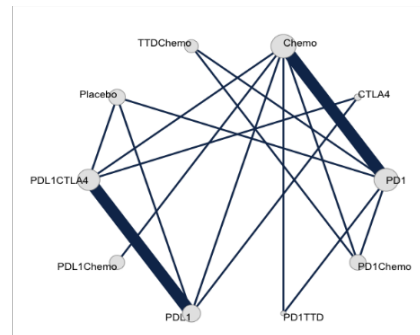

**E. Digestive system cancer**

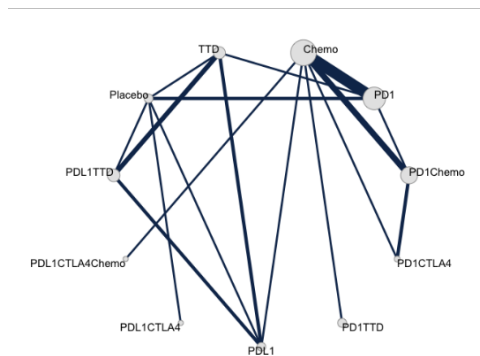

Nodes indicate the classes which are evaluated in clinical trials. Lines represent head-to-head comparisons of the two treatment regimens indicated by the connected nodes. The thickness of lines is weighted according to the number of trials comparing the two connected treatment regimens. The size of the node is proportional to the number of trials evaluating the treatment.

Abbreviations: PAEs, pulmonary adverse events; TTD, Targeted therapy drug; Chemo, Chemotherapy; PD-1, programmed cell death 1; PD-L1, programmed cell death ligand 1; CTLA4, cytotoxic T-lymphocyte antigen 4.

**Figure S5 .The distribution of SUCRA values stratified by cancer types for (A)all-grade PAEs,(B)grade 3-4 PAEs.**

**A. all-grade PAEs**

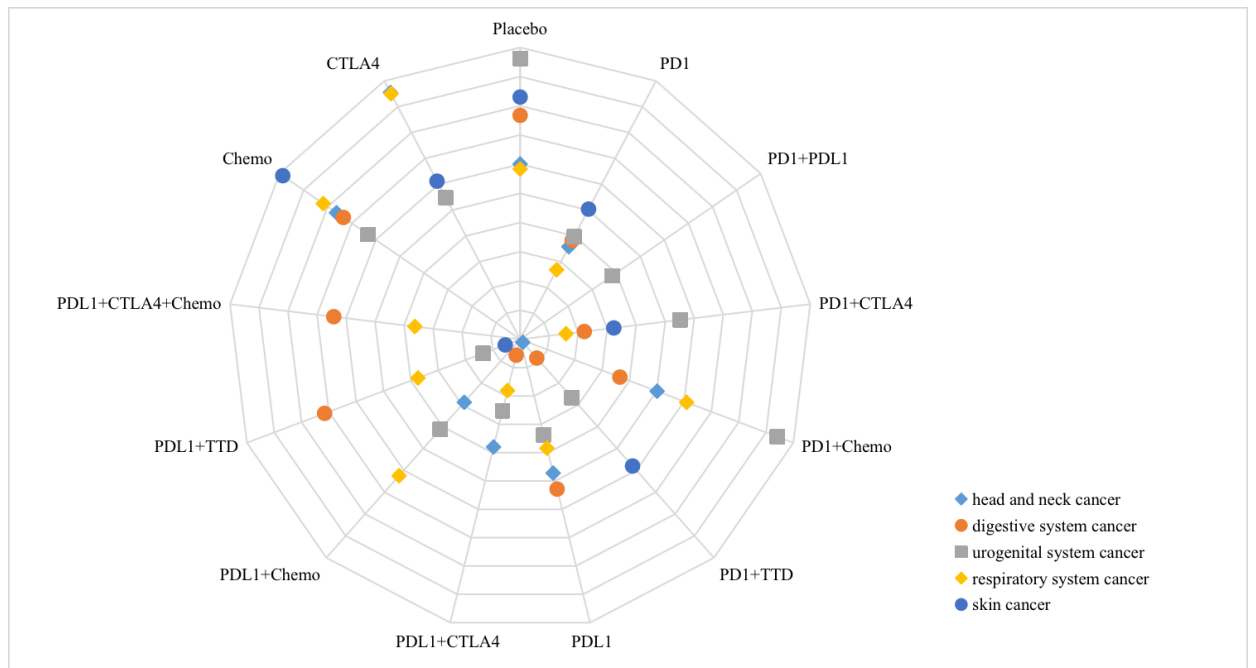

**B. Grade 3-4 PAEs**

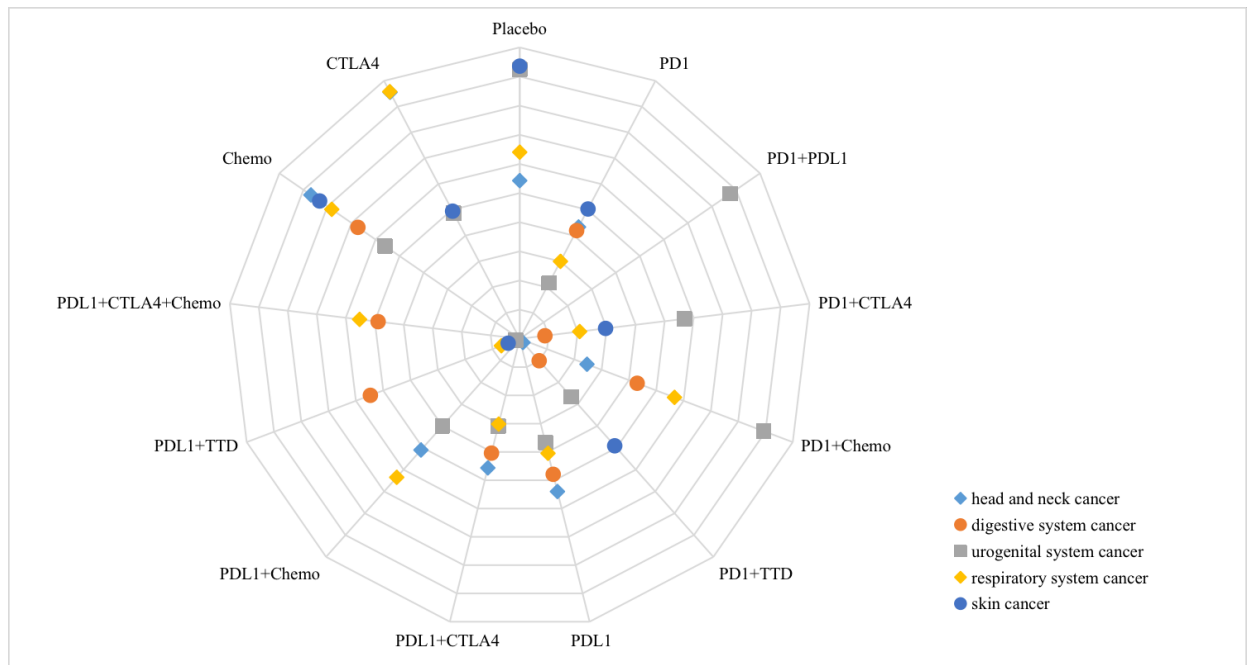

Points closer to the center of the circle represent higher levels of pulmonary toxicity risk.

Abbreviations:PAEs, pulmonary adverse events;TTD, Targeted therapy drug; Chemo, Chemotherapy; PD-1, programmed cell death 1; PD-L1, programmed cell death ligand 1; CTLA4, cytotoxic T-lymphocyte antigen 4;SUCRA, surface under the cumulative ranking.

Figure S6. Subgroup analysis by dose of ICIs for (A)all-grade PAEs;(B) grade 3-4 PAEs.

A. all-grade PAEs

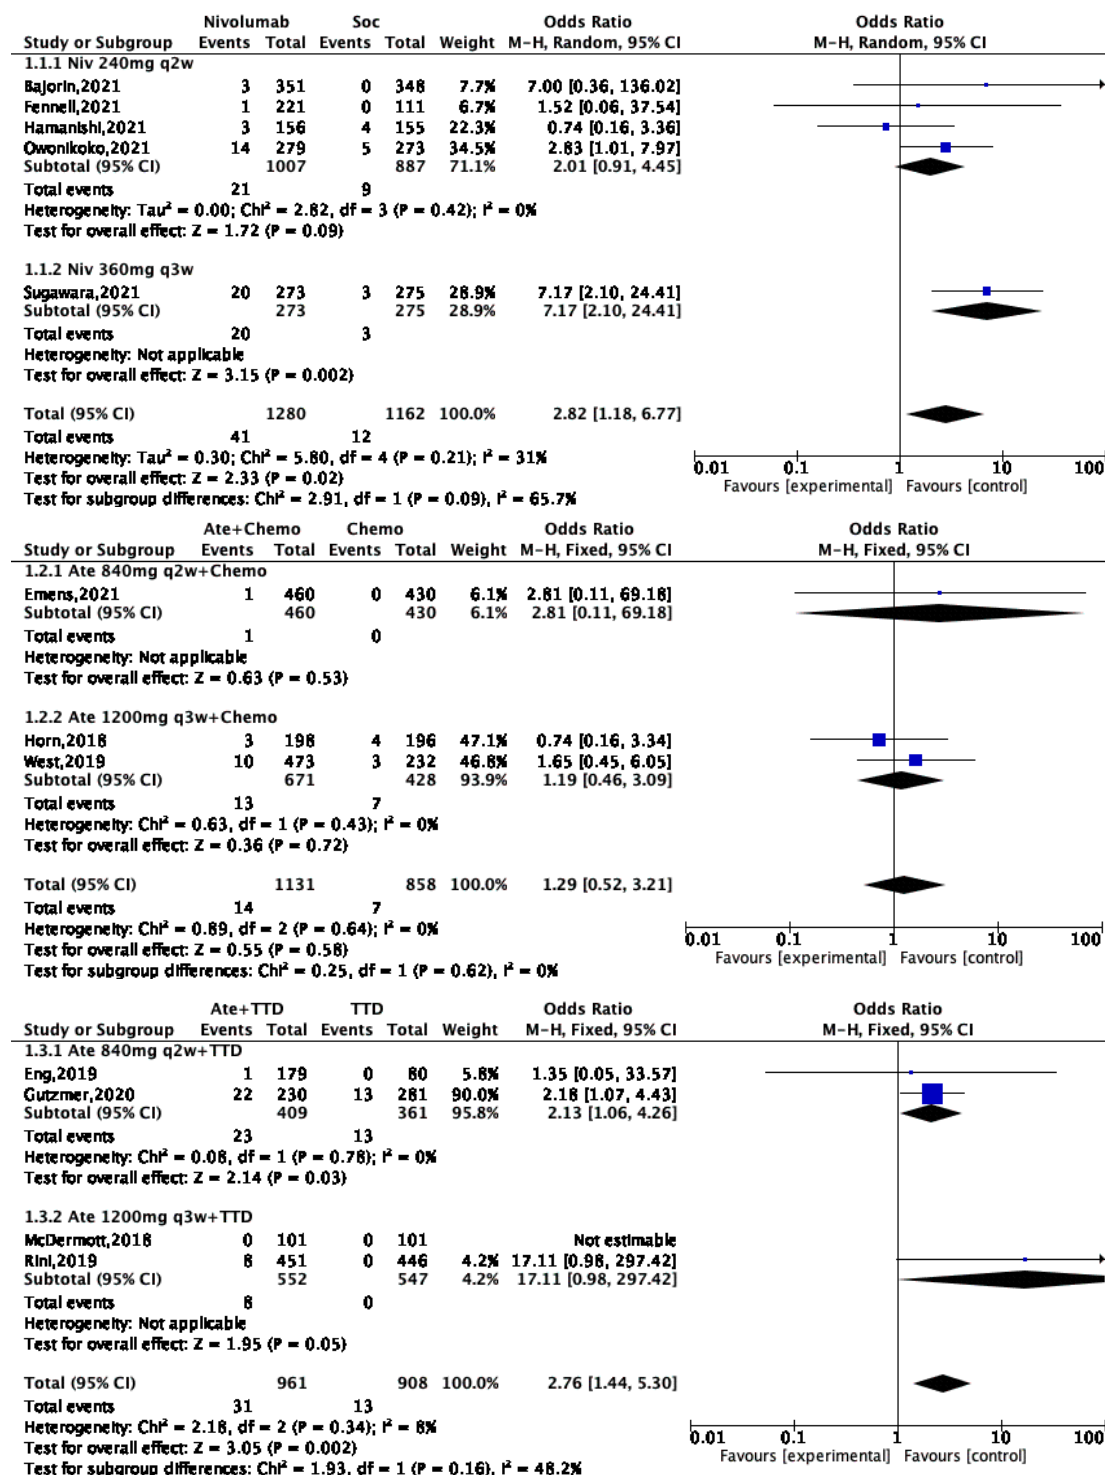

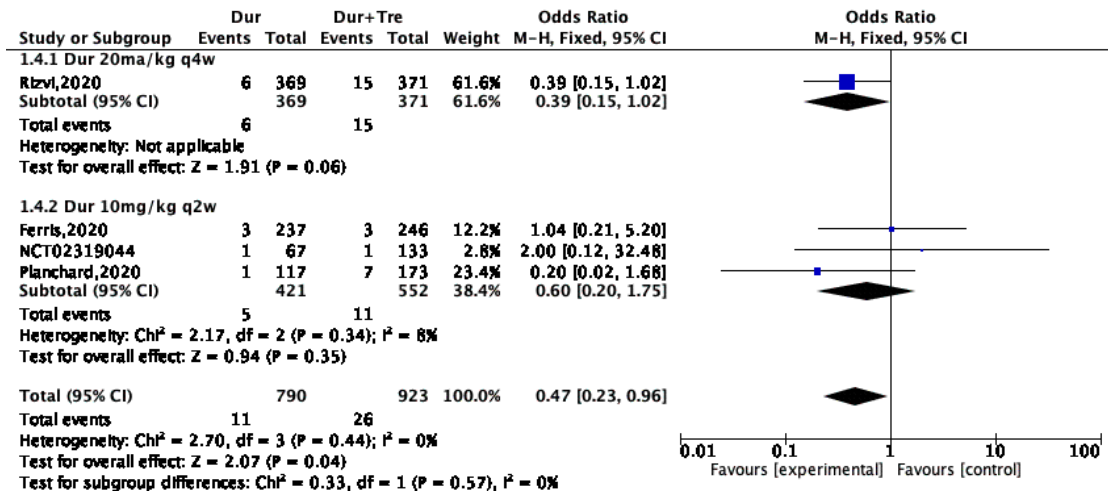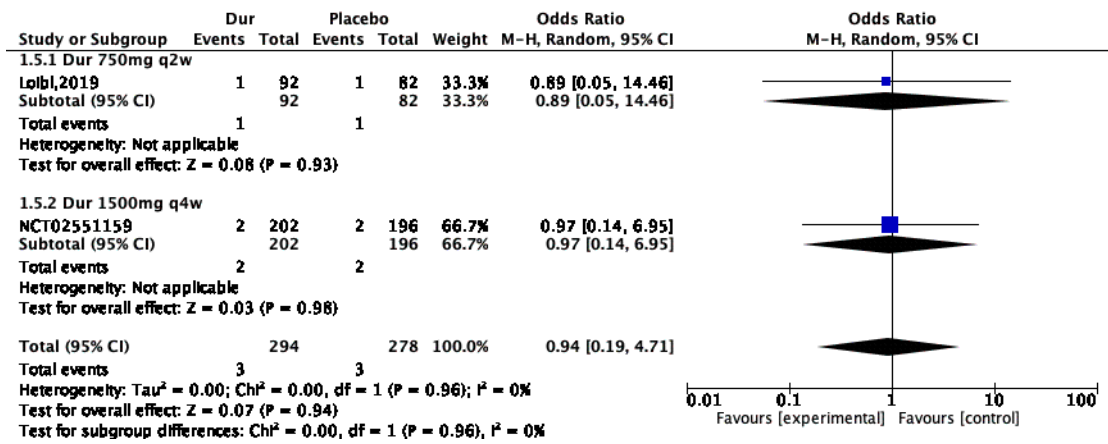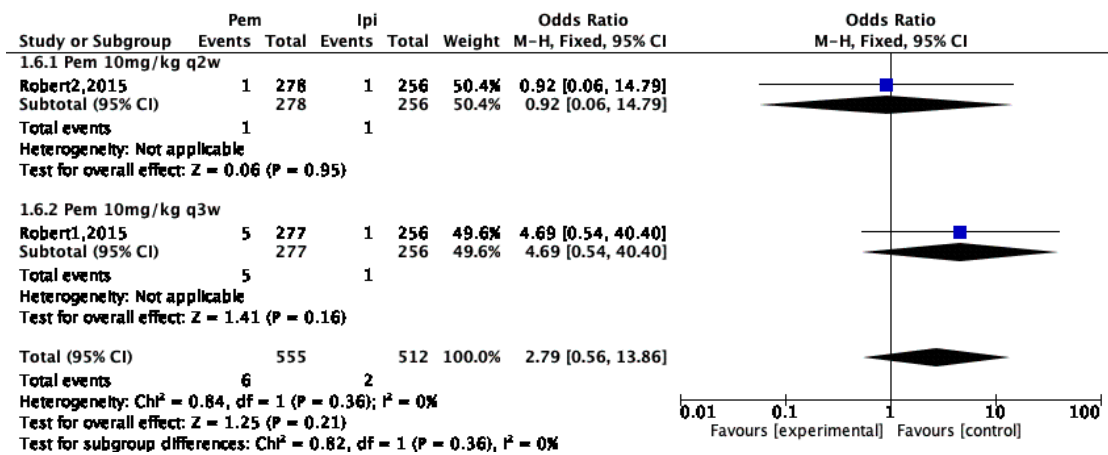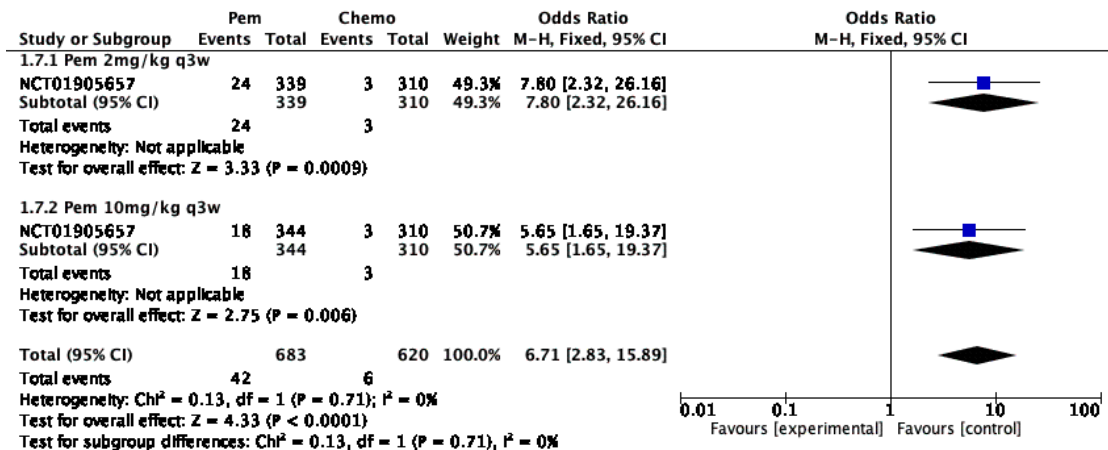

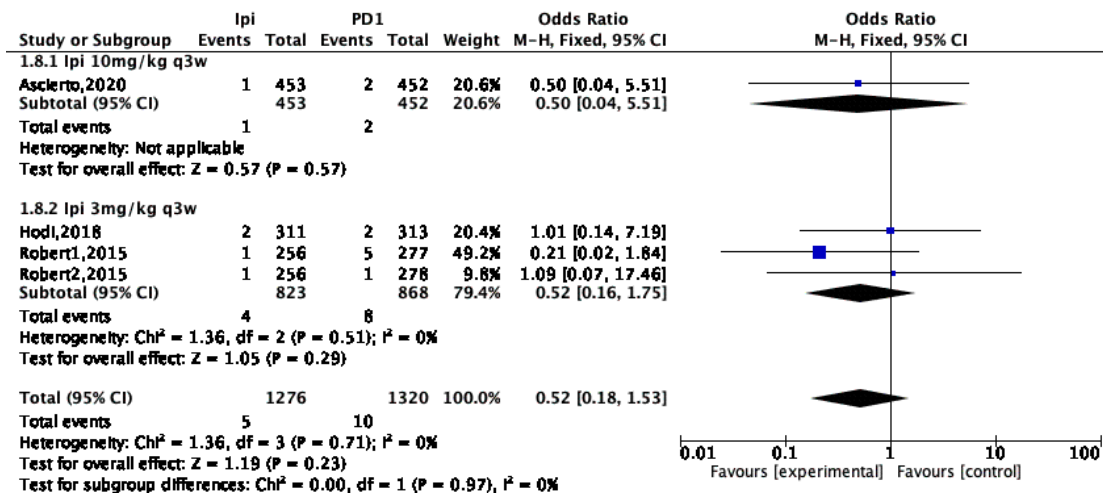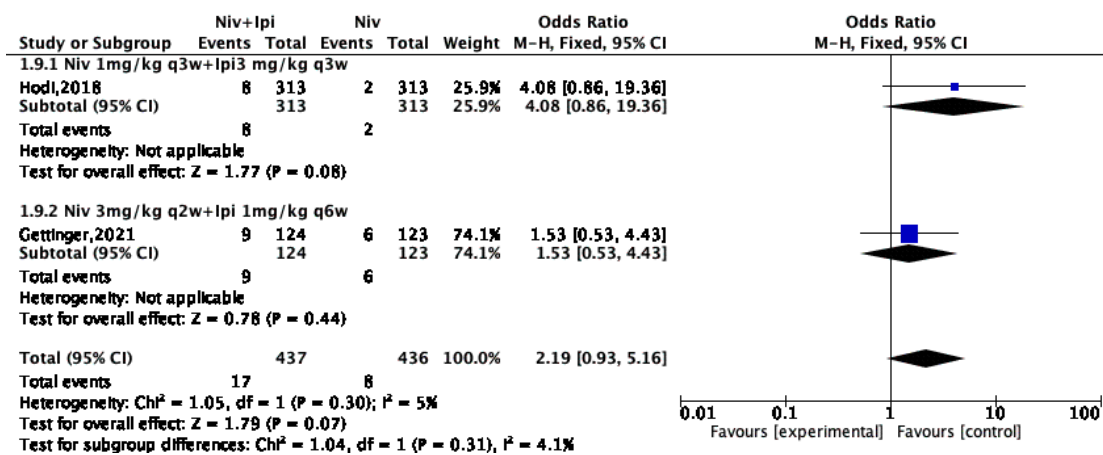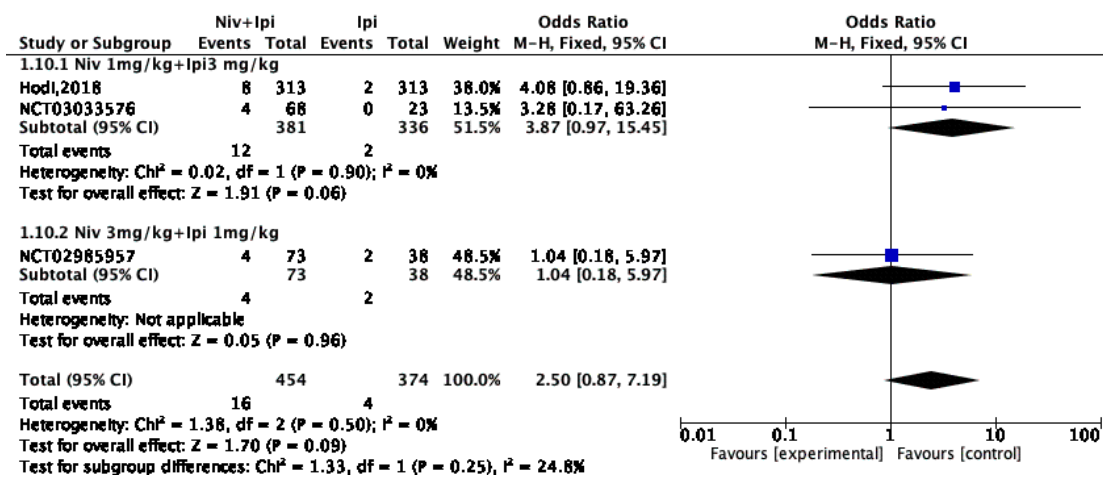

## B. Grade 3-4 PAEs

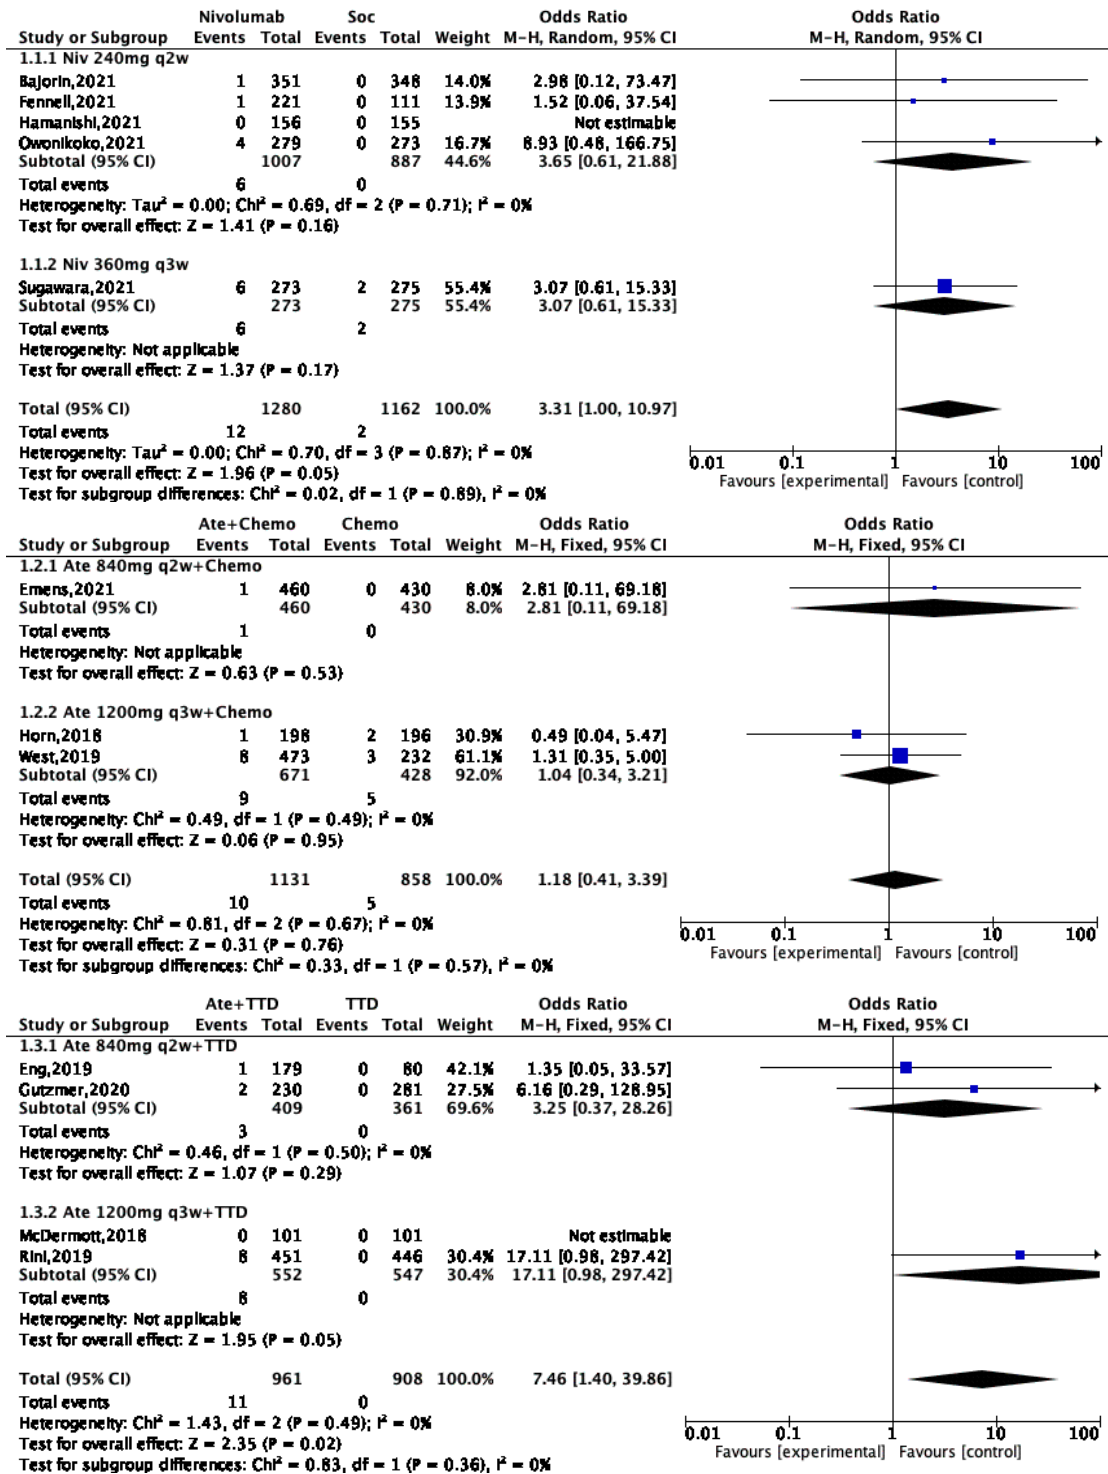



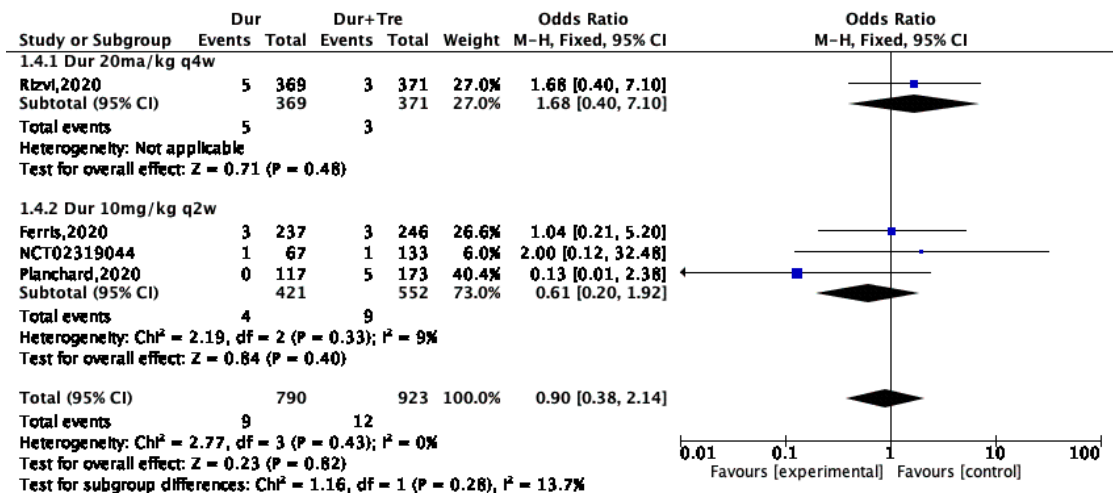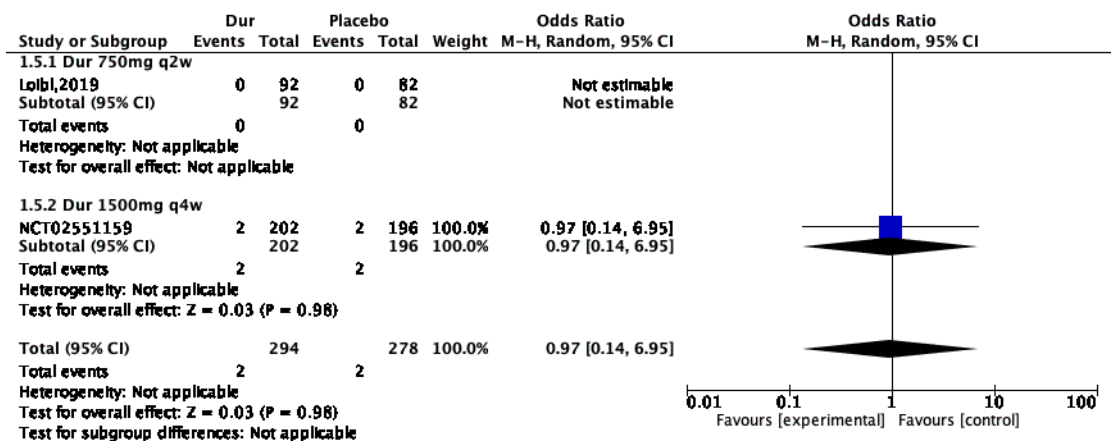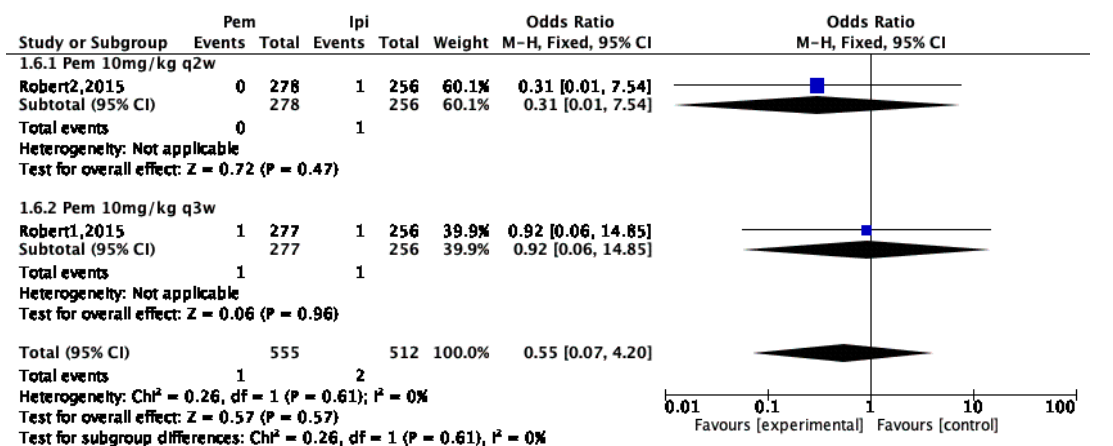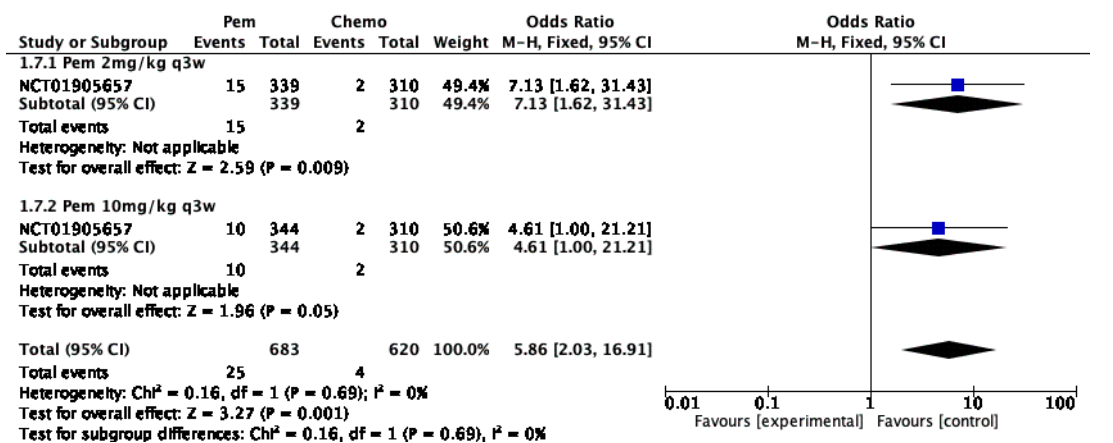

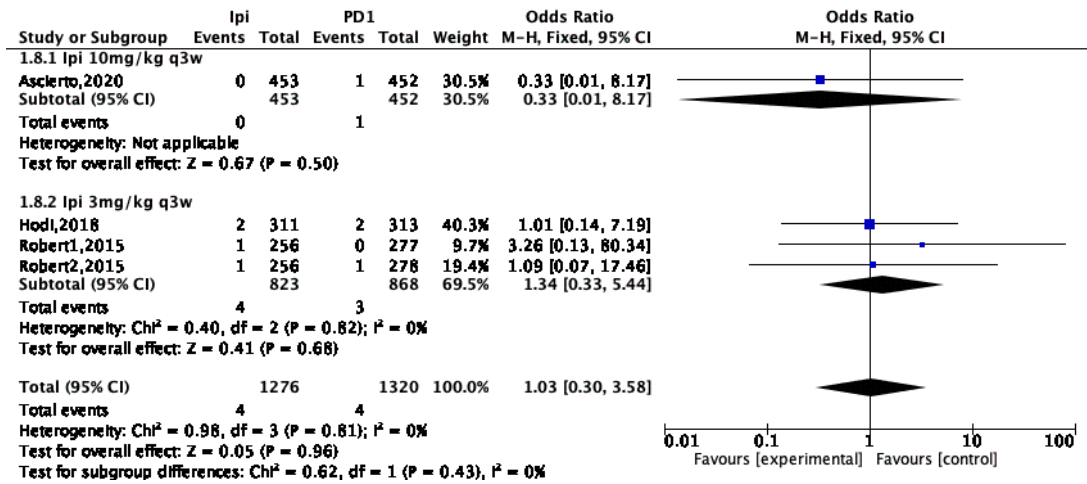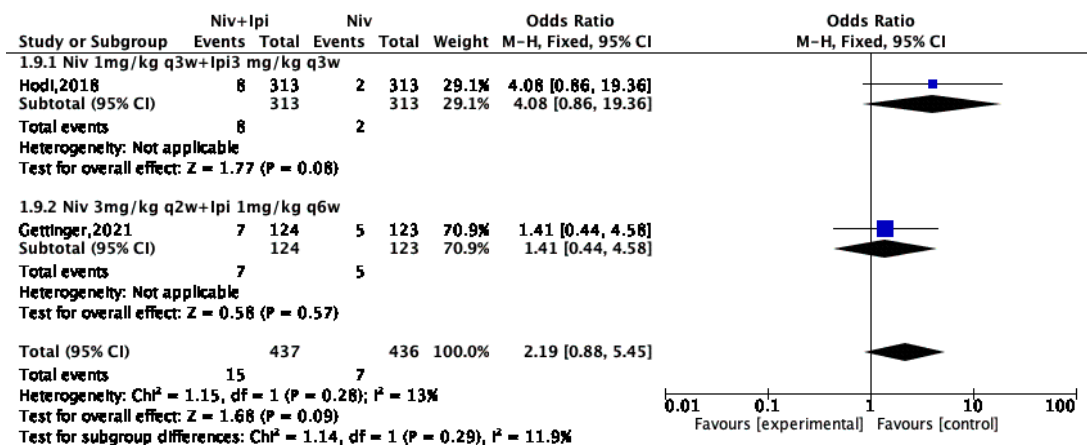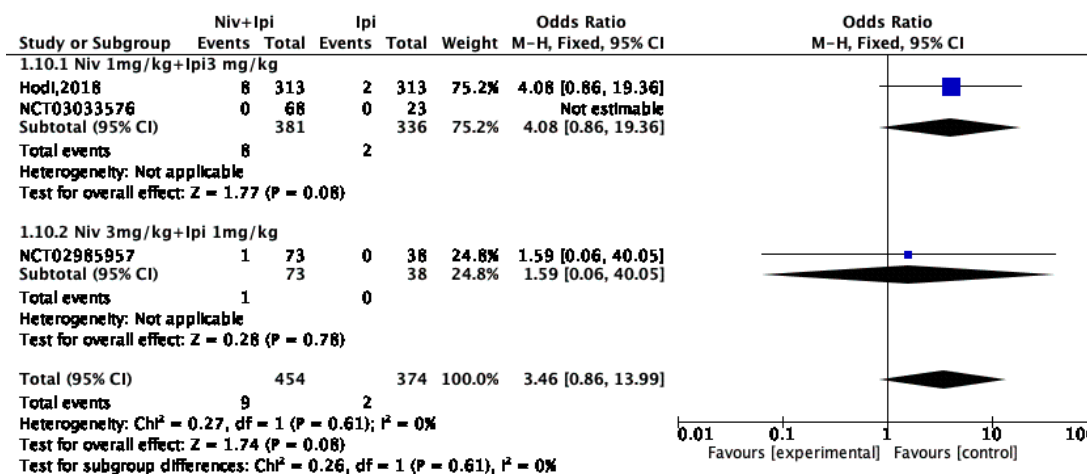

Abbreviations:PAEs, pulmonary adverse events;Chemo, Chemotherapy; Niv, Nivolumab; Ipi, Ipilimumab;Chemo, Chemotherapy;Ate, Atezolizumab.
